# Supplementary material
Source: publisher site journal article supplement (https://cdn.jamanetwork.com/ama/content_public/journal/jama/938034/jpc190002supp3_prod.xlsx)
Supplement: Supplementary file 1 [file jpc190002supp3_prod.xlsx]

## Sheet: Supplement 3
Subject	Product	Analyte	Time	Concentration	BLQ	Age	Sex	Race	Ethnicity	Height	Weight	BMI	BSA	Fitzpatrick_Skin_Type
C.1	Cream	Avobenzone	0	0	< 0.2	51	Female	Asian	Not Hispanic or Latino	151.5	64.4	28.1	1.65	V
C.1	Cream	Avobenzone	0.5	0	< 0.2	51	Female	Asian	Not Hispanic or Latino	151.5	64.4	28.1	1.65	V
C.1	Cream	Avobenzone	1	0	< 0.2	51	Female	Asian	Not Hispanic or Latino	151.5	64.4	28.1	1.65	V
C.1	Cream	Avobenzone	1.5	0	< 0.2	51	Female	Asian	Not Hispanic or Latino	151.5	64.4	28.1	1.65	V
C.1	Cream	Avobenzone	2	0.41		51	Female	Asian	Not Hispanic or Latino	151.5	64.4	28.1	1.65	V
C.1	Cream	Avobenzone	4	0.58		51	Female	Asian	Not Hispanic or Latino	151.5	64.4	28.1	1.65	V
C.1	Cream	Avobenzone	6	0.49		51	Female	Asian	Not Hispanic or Latino	151.5	64.4	28.1	1.65	V
C.1	Cream	Avobenzone	8	0.82		51	Female	Asian	Not Hispanic or Latino	151.5	64.4	28.1	1.65	V
C.1	Cream	Avobenzone	9	1.26		51	Female	Asian	Not Hispanic or Latino	151.5	64.4	28.1	1.65	V
C.1	Cream	Avobenzone	10	1		51	Female	Asian	Not Hispanic or Latino	151.5	64.4	28.1	1.65	V
C.1	Cream	Avobenzone	12	0.89		51	Female	Asian	Not Hispanic or Latino	151.5	64.4	28.1	1.65	V
C.1	Cream	Avobenzone	14	0.77		51	Female	Asian	Not Hispanic or Latino	151.5	64.4	28.1	1.65	V
C.1	Cream	Avobenzone	23	1.08		51	Female	Asian	Not Hispanic or Latino	151.5	64.4	28.1	1.65	V
C.1	Cream	Avobenzone	28	1.27		51	Female	Asian	Not Hispanic or Latino	151.5	64.4	28.1	1.65	V
C.1	Cream	Avobenzone	33	1.89		51	Female	Asian	Not Hispanic or Latino	151.5	64.4	28.1	1.65	V
C.1	Cream	Avobenzone	47	1.46		51	Female	Asian	Not Hispanic or Latino	151.5	64.4	28.1	1.65	V
C.1	Cream	Avobenzone	52	1.18		51	Female	Asian	Not Hispanic or Latino	151.5	64.4	28.1	1.65	V
C.1	Cream	Avobenzone	57	1.96		51	Female	Asian	Not Hispanic or Latino	151.5	64.4	28.1	1.65	V
C.1	Cream	Avobenzone	71	1.75		51	Female	Asian	Not Hispanic or Latino	151.5	64.4	28.1	1.65	V
C.1	Cream	Avobenzone	73	1.69		51	Female	Asian	Not Hispanic or Latino	151.5	64.4	28.1	1.65	V
C.1	Cream	Avobenzone	74	1.45		51	Female	Asian	Not Hispanic or Latino	151.5	64.4	28.1	1.65	V
C.1	Cream	Avobenzone	76	1.35		51	Female	Asian	Not Hispanic or Latino	151.5	64.4	28.1	1.65	V
C.1	Cream	Avobenzone	78	2.12		51	Female	Asian	Not Hispanic or Latino	151.5	64.4	28.1	1.65	V
C.1	Cream	Avobenzone	81	2.27		51	Female	Asian	Not Hispanic or Latino	151.5	64.4	28.1	1.65	V
C.1	Cream	Avobenzone	82	2.06		51	Female	Asian	Not Hispanic or Latino	151.5	64.4	28.1	1.65	V
C.1	Cream	Avobenzone	84	1.39		51	Female	Asian	Not Hispanic or Latino	151.5	64.4	28.1	1.65	V
C.1	Cream	Avobenzone	86	1.47		51	Female	Asian	Not Hispanic or Latino	151.5	64.4	28.1	1.65	V
C.1	Cream	Avobenzone	95	1.16		51	Female	Asian	Not Hispanic or Latino	151.5	64.4	28.1	1.65	V
C.1	Cream	Avobenzone	120	1.21		51	Female	Asian	Not Hispanic or Latino	151.5	64.4	28.1	1.65	V
C.1	Cream	Avobenzone	144	0.71		51	Female	Asian	Not Hispanic or Latino	151.5	64.4	28.1	1.65	V
C.1	Cream	Ecamsule	0	0	< 0.2	51	Female	Asian	Not Hispanic or Latino	151.5	64.4	28.1	1.65	V
C.1	Cream	Ecamsule	0.5	0	< 0.2	51	Female	Asian	Not Hispanic or Latino	151.5	64.4	28.1	1.65	V
C.1	Cream	Ecamsule	1	0	< 0.2	51	Female	Asian	Not Hispanic or Latino	151.5	64.4	28.1	1.65	V
C.1	Cream	Ecamsule	1.5	0	< 0.2	51	Female	Asian	Not Hispanic or Latino	151.5	64.4	28.1	1.65	V
C.1	Cream	Ecamsule	2	0	< 0.2	51	Female	Asian	Not Hispanic or Latino	151.5	64.4	28.1	1.65	V
C.1	Cream	Ecamsule	4	0	< 0.2	51	Female	Asian	Not Hispanic or Latino	151.5	64.4	28.1	1.65	V
C.1	Cream	Ecamsule	6	0	< 0.2	51	Female	Asian	Not Hispanic or Latino	151.5	64.4	28.1	1.65	V
C.1	Cream	Ecamsule	8	0.4		51	Female	Asian	Not Hispanic or Latino	151.5	64.4	28.1	1.65	V
C.1	Cream	Ecamsule	9	0	< 0.2	51	Female	Asian	Not Hispanic or Latino	151.5	64.4	28.1	1.65	V
C.1	Cream	Ecamsule	10	0	< 0.2	51	Female	Asian	Not Hispanic or Latino	151.5	64.4	28.1	1.65	V
C.1	Cream	Ecamsule	12	0	< 0.2	51	Female	Asian	Not Hispanic or Latino	151.5	64.4	28.1	1.65	V
C.1	Cream	Ecamsule	14	0	< 0.2	51	Female	Asian	Not Hispanic or Latino	151.5	64.4	28.1	1.65	V
C.1	Cream	Ecamsule	23	0	< 0.2	51	Female	Asian	Not Hispanic or Latino	151.5	64.4	28.1	1.65	V
C.1	Cream	Ecamsule	28	0	< 0.2	51	Female	Asian	Not Hispanic or Latino	151.5	64.4	28.1	1.65	V
C.1	Cream	Ecamsule	33	0	< 0.2	51	Female	Asian	Not Hispanic or Latino	151.5	64.4	28.1	1.65	V
C.1	Cream	Ecamsule	47	0	< 0.2	51	Female	Asian	Not Hispanic or Latino	151.5	64.4	28.1	1.65	V
C.1	Cream	Ecamsule	52	0	< 0.2	51	Female	Asian	Not Hispanic or Latino	151.5	64.4	28.1	1.65	V
C.1	Cream	Ecamsule	57	0	< 0.2	51	Female	Asian	Not Hispanic or Latino	151.5	64.4	28.1	1.65	V
C.1	Cream	Ecamsule	71	0	< 0.2	51	Female	Asian	Not Hispanic or Latino	151.5	64.4	28.1	1.65	V
C.1	Cream	Ecamsule	73	0	< 0.2	51	Female	Asian	Not Hispanic or Latino	151.5	64.4	28.1	1.65	V
C.1	Cream	Ecamsule	74	0	< 0.2	51	Female	Asian	Not Hispanic or Latino	151.5	64.4	28.1	1.65	V
C.1	Cream	Ecamsule	76	0	< 0.2	51	Female	Asian	Not Hispanic or Latino	151.5	64.4	28.1	1.65	V
C.1	Cream	Ecamsule	78	0	< 0.2	51	Female	Asian	Not Hispanic or Latino	151.5	64.4	28.1	1.65	V
C.1	Cream	Ecamsule	81	0	< 0.2	51	Female	Asian	Not Hispanic or Latino	151.5	64.4	28.1	1.65	V
C.1	Cream	Ecamsule	82	0	< 0.2	51	Female	Asian	Not Hispanic or Latino	151.5	64.4	28.1	1.65	V
C.1	Cream	Ecamsule	84	0	< 0.2	51	Female	Asian	Not Hispanic or Latino	151.5	64.4	28.1	1.65	V
C.1	Cream	Ecamsule	86	0.49		51	Female	Asian	Not Hispanic or Latino	151.5	64.4	28.1	1.65	V
C.1	Cream	Ecamsule	95	0	< 0.2	51	Female	Asian	Not Hispanic or Latino	151.5	64.4	28.1	1.65	V
C.1	Cream	Ecamsule	120	0	< 0.2	51	Female	Asian	Not Hispanic or Latino	151.5	64.4	28.1	1.65	V
C.1	Cream	Ecamsule	144	0	< 0.2	51	Female	Asian	Not Hispanic or Latino	151.5	64.4	28.1	1.65	V
C.1	Cream	Octocrylene	0	0	< 0.4	51	Female	Asian	Not Hispanic or Latino	151.5	64.4	28.1	1.65	V
C.1	Cream	Octocrylene	0.5	0	< 0.4	51	Female	Asian	Not Hispanic or Latino	151.5	64.4	28.1	1.65	V
C.1	Cream	Octocrylene	1	0	< 0.4	51	Female	Asian	Not Hispanic or Latino	151.5	64.4	28.1	1.65	V
C.1	Cream	Octocrylene	1.5	0	< 0.4	51	Female	Asian	Not Hispanic or Latino	151.5	64.4	28.1	1.65	V
C.1	Cream	Octocrylene	2	0.51		51	Female	Asian	Not Hispanic or Latino	151.5	64.4	28.1	1.65	V
C.1	Cream	Octocrylene	4	1.04		51	Female	Asian	Not Hispanic or Latino	151.5	64.4	28.1	1.65	V
C.1	Cream	Octocrylene	6	1.13		51	Female	Asian	Not Hispanic or Latino	151.5	64.4	28.1	1.65	V
C.1	Cream	Octocrylene	8	1.78		51	Female	Asian	Not Hispanic or Latino	151.5	64.4	28.1	1.65	V
C.1	Cream	Octocrylene	9	2.18		51	Female	Asian	Not Hispanic or Latino	151.5	64.4	28.1	1.65	V
C.1	Cream	Octocrylene	10	1.92		51	Female	Asian	Not Hispanic or Latino	151.5	64.4	28.1	1.65	V
C.1	Cream	Octocrylene	12	1.93		51	Female	Asian	Not Hispanic or Latino	151.5	64.4	28.1	1.65	V
C.1	Cream	Octocrylene	14	1.5		51	Female	Asian	Not Hispanic or Latino	151.5	64.4	28.1	1.65	V
C.1	Cream	Octocrylene	23	2.25		51	Female	Asian	Not Hispanic or Latino	151.5	64.4	28.1	1.65	V
C.1	Cream	Octocrylene	28	3.03		51	Female	Asian	Not Hispanic or Latino	151.5	64.4	28.1	1.65	V
C.1	Cream	Octocrylene	33	4.55		51	Female	Asian	Not Hispanic or Latino	151.5	64.4	28.1	1.65	V
C.1	Cream	Octocrylene	47	3.04		51	Female	Asian	Not Hispanic or Latino	151.5	64.4	28.1	1.65	V
C.1	Cream	Octocrylene	52	2.71		51	Female	Asian	Not Hispanic or Latino	151.5	64.4	28.1	1.65	V
C.1	Cream	Octocrylene	57	4.88		51	Female	Asian	Not Hispanic or Latino	151.5	64.4	28.1	1.65	V
C.1	Cream	Octocrylene	71	4.42		51	Female	Asian	Not Hispanic or Latino	151.5	64.4	28.1	1.65	V
C.1	Cream	Octocrylene	73	3.7		51	Female	Asian	Not Hispanic or Latino	151.5	64.4	28.1	1.65	V
C.1	Cream	Octocrylene	74	3.93		51	Female	Asian	Not Hispanic or Latino	151.5	64.4	28.1	1.65	V
C.1	Cream	Octocrylene	76	3.47		51	Female	Asian	Not Hispanic or Latino	151.5	64.4	28.1	1.65	V
C.1	Cream	Octocrylene	78	4.61		51	Female	Asian	Not Hispanic or Latino	151.5	64.4	28.1	1.65	V
C.1	Cream	Octocrylene	81	5.33		51	Female	Asian	Not Hispanic or Latino	151.5	64.4	28.1	1.65	V
C.1	Cream	Octocrylene	82	4.81		51	Female	Asian	Not Hispanic or Latino	151.5	64.4	28.1	1.65	V
C.1	Cream	Octocrylene	84	3.56		51	Female	Asian	Not Hispanic or Latino	151.5	64.4	28.1	1.65	V
C.1	Cream	Octocrylene	86	3.87		51	Female	Asian	Not Hispanic or Latino	151.5	64.4	28.1	1.65	V
C.1	Cream	Octocrylene	95	2.68		51	Female	Asian	Not Hispanic or Latino	151.5	64.4	28.1	1.65	V
C.1	Cream	Octocrylene	120	3.09		51	Female	Asian	Not Hispanic or Latino	151.5	64.4	28.1	1.65	V
C.1	Cream	Octocrylene	144	2.61		51	Female	Asian	Not Hispanic or Latino	151.5	64.4	28.1	1.65	V
C.2	Cream	Avobenzone	0	0	< 0.2	23	Male	Black or African American	Not Hispanic or Latino	173.5	71.2	23.7	1.85	VI
C.2	Cream	Avobenzone	0.5	0	< 0.2	23	Male	Black or African American	Not Hispanic or Latino	173.5	71.2	23.7	1.85	VI
C.2	Cream	Avobenzone	1	0	< 0.2	23	Male	Black or African American	Not Hispanic or Latino	173.5	71.2	23.7	1.85	VI
C.2	Cream	Avobenzone	1.5	0	< 0.2	23	Male	Black or African American	Not Hispanic or Latino	173.5	71.2	23.7	1.85	VI
C.2	Cream	Avobenzone	2	0	< 0.2	23	Male	Black or African American	Not Hispanic or Latino	173.5	71.2	23.7	1.85	VI
C.2	Cream	Avobenzone	4	0	< 0.2	23	Male	Black or African American	Not Hispanic or Latino	173.5	71.2	23.7	1.85	VI
C.2	Cream	Avobenzone	6	0.28		23	Male	Black or African American	Not Hispanic or Latino	173.5	71.2	23.7	1.85	VI
C.2	Cream	Avobenzone	8	0.67		23	Male	Black or African American	Not Hispanic or Latino	173.5	71.2	23.7	1.85	VI
C.2	Cream	Avobenzone	9	0.76		23	Male	Black or African American	Not Hispanic or Latino	173.5	71.2	23.7	1.85	VI
C.2	Cream	Avobenzone	10	0.63		23	Male	Black or African American	Not Hispanic or Latino	173.5	71.2	23.7	1.85	VI
C.2	Cream	Avobenzone	12	0.68		23	Male	Black or African American	Not Hispanic or Latino	173.5	71.2	23.7	1.85	VI
C.2	Cream	Avobenzone	14	1.07		23	Male	Black or African American	Not Hispanic or Latino	173.5	71.2	23.7	1.85	VI
C.2	Cream	Avobenzone	23	1.08		23	Male	Black or African American	Not Hispanic or Latino	173.5	71.2	23.7	1.85	VI
C.2	Cream	Avobenzone	28	0.64		23	Male	Black or African American	Not Hispanic or Latino	173.5	71.2	23.7	1.85	VI
C.2	Cream	Avobenzone	33	1.41		23	Male	Black or African American	Not Hispanic or Latino	173.5	71.2	23.7	1.85	VI
C.2	Cream	Avobenzone	47	1.03		23	Male	Black or African American	Not Hispanic or Latino	173.5	71.2	23.7	1.85	VI
C.2	Cream	Avobenzone	52	2.14		23	Male	Black or African American	Not Hispanic or Latino	173.5	71.2	23.7	1.85	VI
C.2	Cream	Avobenzone	57	2.36		23	Male	Black or African American	Not Hispanic or Latino	173.5	71.2	23.7	1.85	VI
C.2	Cream	Avobenzone	71	2.63		23	Male	Black or African American	Not Hispanic or Latino	173.5	71.2	23.7	1.85	VI
C.2	Cream	Avobenzone	73	1.69		23	Male	Black or African American	Not Hispanic or Latino	173.5	71.2	23.7	1.85	VI
C.2	Cream	Avobenzone	74	2.1		23	Male	Black or African American	Not Hispanic or Latino	173.5	71.2	23.7	1.85	VI
C.2	Cream	Avobenzone	76	1.69		23	Male	Black or African American	Not Hispanic or Latino	173.5	71.2	23.7	1.85	VI
C.2	Cream	Avobenzone	78	2.47		23	Male	Black or African American	Not Hispanic or Latino	173.5	71.2	23.7	1.85	VI
C.2	Cream	Avobenzone	81	2.27		23	Male	Black or African American	Not Hispanic or Latino	173.5	71.2	23.7	1.85	VI
C.2	Cream	Avobenzone	82	2.61		23	Male	Black or African American	Not Hispanic or Latino	173.5	71.2	23.7	1.85	VI
C.2	Cream	Avobenzone	84	2.71		23	Male	Black or African American	Not Hispanic or Latino	173.5	71.2	23.7	1.85	VI
C.2	Cream	Avobenzone	86	1.94		23	Male	Black or African American	Not Hispanic or Latino	173.5	71.2	23.7	1.85	VI
C.2	Cream	Avobenzone	95	1.88		23	Male	Black or African American	Not Hispanic or Latino	173.5	71.2	23.7	1.85	VI
C.2	Cream	Avobenzone	120	1.23		23	Male	Black or African American	Not Hispanic or Latino	173.5	71.2	23.7	1.85	VI
C.2	Cream	Avobenzone	144	0.71		23	Male	Black or African American	Not Hispanic or Latino	173.5	71.2	23.7	1.85	VI
C.2	Cream	Ecamsule	0	0	< 0.2	23	Male	Black or African American	Not Hispanic or Latino	173.5	71.2	23.7	1.85	VI
C.2	Cream	Ecamsule	0.5	0	< 0.2	23	Male	Black or African American	Not Hispanic or Latino	173.5	71.2	23.7	1.85	VI
C.2	Cream	Ecamsule	1	0	< 0.2	23	Male	Black or African American	Not Hispanic or Latino	173.5	71.2	23.7	1.85	VI
C.2	Cream	Ecamsule	1.5	0	< 0.2	23	Male	Black or African American	Not Hispanic or Latino	173.5	71.2	23.7	1.85	VI
C.2	Cream	Ecamsule	2	0	< 0.2	23	Male	Black or African American	Not Hispanic or Latino	173.5	71.2	23.7	1.85	VI
C.2	Cream	Ecamsule	4	0	< 0.2	23	Male	Black or African American	Not Hispanic or Latino	173.5	71.2	23.7	1.85	VI
C.2	Cream	Ecamsule	6	0	< 0.2	23	Male	Black or African American	Not Hispanic or Latino	173.5	71.2	23.7	1.85	VI
C.2	Cream	Ecamsule	8	0	< 0.2	23	Male	Black or African American	Not Hispanic or Latino	173.5	71.2	23.7	1.85	VI
C.2	Cream	Ecamsule	9	0.7		23	Male	Black or African American	Not Hispanic or Latino	173.5	71.2	23.7	1.85	VI
C.2	Cream	Ecamsule	10	0	< 0.2	23	Male	Black or African American	Not Hispanic or Latino	173.5	71.2	23.7	1.85	VI
C.2	Cream	Ecamsule	12	0	< 0.2	23	Male	Black or African American	Not Hispanic or Latino	173.5	71.2	23.7	1.85	VI
C.2	Cream	Ecamsule	14	0	< 0.2	23	Male	Black or African American	Not Hispanic or Latino	173.5	71.2	23.7	1.85	VI
C.2	Cream	Ecamsule	23	12.12		23	Male	Black or African American	Not Hispanic or Latino	173.5	71.2	23.7	1.85	VI
C.2	Cream	Ecamsule	28	0	< 0.2	23	Male	Black or African American	Not Hispanic or Latino	173.5	71.2	23.7	1.85	VI
C.2	Cream	Ecamsule	33	0.33		23	Male	Black or African American	Not Hispanic or Latino	173.5	71.2	23.7	1.85	VI
C.2	Cream	Ecamsule	47	0	< 0.2	23	Male	Black or African American	Not Hispanic or Latino	173.5	71.2	23.7	1.85	VI
C.2	Cream	Ecamsule	52	0	< 0.2	23	Male	Black or African American	Not Hispanic or Latino	173.5	71.2	23.7	1.85	VI
C.2	Cream	Ecamsule	57	0	< 0.2	23	Male	Black or African American	Not Hispanic or Latino	173.5	71.2	23.7	1.85	VI
C.2	Cream	Ecamsule	71	0	< 0.2	23	Male	Black or African American	Not Hispanic or Latino	173.5	71.2	23.7	1.85	VI
C.2	Cream	Ecamsule	73	0	< 0.2	23	Male	Black or African American	Not Hispanic or Latino	173.5	71.2	23.7	1.85	VI
C.2	Cream	Ecamsule	74	0	< 0.2	23	Male	Black or African American	Not Hispanic or Latino	173.5	71.2	23.7	1.85	VI
C.2	Cream	Ecamsule	76	0	< 0.2	23	Male	Black or African American	Not Hispanic or Latino	173.5	71.2	23.7	1.85	VI
C.2	Cream	Ecamsule	78	0.28		23	Male	Black or African American	Not Hispanic or Latino	173.5	71.2	23.7	1.85	VI
C.2	Cream	Ecamsule	81	0.59		23	Male	Black or African American	Not Hispanic or Latino	173.5	71.2	23.7	1.85	VI
C.2	Cream	Ecamsule	82	0	< 0.2	23	Male	Black or African American	Not Hispanic or Latino	173.5	71.2	23.7	1.85	VI
C.2	Cream	Ecamsule	84	0	< 0.2	23	Male	Black or African American	Not Hispanic or Latino	173.5	71.2	23.7	1.85	VI
C.2	Cream	Ecamsule	86	0	< 0.2	23	Male	Black or African American	Not Hispanic or Latino	173.5	71.2	23.7	1.85	VI
C.2	Cream	Ecamsule	95	0.2		23	Male	Black or African American	Not Hispanic or Latino	173.5	71.2	23.7	1.85	VI
C.2	Cream	Ecamsule	120	0	< 0.2	23	Male	Black or African American	Not Hispanic or Latino	173.5	71.2	23.7	1.85	VI
C.2	Cream	Ecamsule	144	0	< 0.2	23	Male	Black or African American	Not Hispanic or Latino	173.5	71.2	23.7	1.85	VI
C.2	Cream	Octocrylene	0	0	< 0.4	23	Male	Black or African American	Not Hispanic or Latino	173.5	71.2	23.7	1.85	VI
C.2	Cream	Octocrylene	0.5	0	< 0.4	23	Male	Black or African American	Not Hispanic or Latino	173.5	71.2	23.7	1.85	VI
C.2	Cream	Octocrylene	1	0	< 0.4	23	Male	Black or African American	Not Hispanic or Latino	173.5	71.2	23.7	1.85	VI
C.2	Cream	Octocrylene	1.5	0	< 0.4	23	Male	Black or African American	Not Hispanic or Latino	173.5	71.2	23.7	1.85	VI
C.2	Cream	Octocrylene	2	0.4		23	Male	Black or African American	Not Hispanic or Latino	173.5	71.2	23.7	1.85	VI
C.2	Cream	Octocrylene	4	0.44		23	Male	Black or African American	Not Hispanic or Latino	173.5	71.2	23.7	1.85	VI
C.2	Cream	Octocrylene	6	0.88		23	Male	Black or African American	Not Hispanic or Latino	173.5	71.2	23.7	1.85	VI
C.2	Cream	Octocrylene	8	1.98		23	Male	Black or African American	Not Hispanic or Latino	173.5	71.2	23.7	1.85	VI
C.2	Cream	Octocrylene	9	2.93		23	Male	Black or African American	Not Hispanic or Latino	173.5	71.2	23.7	1.85	VI
C.2	Cream	Octocrylene	10	1.44		23	Male	Black or African American	Not Hispanic or Latino	173.5	71.2	23.7	1.85	VI
C.2	Cream	Octocrylene	12	1.72		23	Male	Black or African American	Not Hispanic or Latino	173.5	71.2	23.7	1.85	VI
C.2	Cream	Octocrylene	14	2.15		23	Male	Black or African American	Not Hispanic or Latino	173.5	71.2	23.7	1.85	VI
C.2	Cream	Octocrylene	23	4.19		23	Male	Black or African American	Not Hispanic or Latino	173.5	71.2	23.7	1.85	VI
C.2	Cream	Octocrylene	28	1.46		23	Male	Black or African American	Not Hispanic or Latino	173.5	71.2	23.7	1.85	VI
C.2	Cream	Octocrylene	33	3.3		23	Male	Black or African American	Not Hispanic or Latino	173.5	71.2	23.7	1.85	VI
C.2	Cream	Octocrylene	47	2.48		23	Male	Black or African American	Not Hispanic or Latino	173.5	71.2	23.7	1.85	VI
C.2	Cream	Octocrylene	52	4.87		23	Male	Black or African American	Not Hispanic or Latino	173.5	71.2	23.7	1.85	VI
C.2	Cream	Octocrylene	57	4.7		23	Male	Black or African American	Not Hispanic or Latino	173.5	71.2	23.7	1.85	VI
C.2	Cream	Octocrylene	71	10.26		23	Male	Black or African American	Not Hispanic or Latino	173.5	71.2	23.7	1.85	VI
C.2	Cream	Octocrylene	73	3.26		23	Male	Black or African American	Not Hispanic or Latino	173.5	71.2	23.7	1.85	VI
C.2	Cream	Octocrylene	74	2.63		23	Male	Black or African American	Not Hispanic or Latino	173.5	71.2	23.7	1.85	VI
C.2	Cream	Octocrylene	76	4.12		23	Male	Black or African American	Not Hispanic or Latino	173.5	71.2	23.7	1.85	VI
C.2	Cream	Octocrylene	78	4.08		23	Male	Black or African American	Not Hispanic or Latino	173.5	71.2	23.7	1.85	VI
C.2	Cream	Octocrylene	81	5.31		23	Male	Black or African American	Not Hispanic or Latino	173.5	71.2	23.7	1.85	VI
C.2	Cream	Octocrylene	82	4.38		23	Male	Black or African American	Not Hispanic or Latino	173.5	71.2	23.7	1.85	VI
C.2	Cream	Octocrylene	84	4.52		23	Male	Black or African American	Not Hispanic or Latino	173.5	71.2	23.7	1.85	VI
C.2	Cream	Octocrylene	86	2.68		23	Male	Black or African American	Not Hispanic or Latino	173.5	71.2	23.7	1.85	VI
C.2	Cream	Octocrylene	95	2.35		23	Male	Black or African American	Not Hispanic or Latino	173.5	71.2	23.7	1.85	VI
C.2	Cream	Octocrylene	120	1.66		23	Male	Black or African American	Not Hispanic or Latino	173.5	71.2	23.7	1.85	VI
C.2	Cream	Octocrylene	144	1.43		23	Male	Black or African American	Not Hispanic or Latino	173.5	71.2	23.7	1.85	VI
C.3	Cream	Avobenzone	0	0	< 0.2	24	Male	Black or African American	Not Hispanic or Latino	178.5	72.6	22.8	1.9	VI
C.3	Cream	Avobenzone	0.5	0	< 0.2	24	Male	Black or African American	Not Hispanic or Latino	178.5	72.6	22.8	1.9	VI
C.3	Cream	Avobenzone	1	0	< 0.2	24	Male	Black or African American	Not Hispanic or Latino	178.5	72.6	22.8	1.9	VI
C.3	Cream	Avobenzone	1.5	0	< 0.2	24	Male	Black or African American	Not Hispanic or Latino	178.5	72.6	22.8	1.9	VI
C.3	Cream	Avobenzone	2	0	< 0.2	24	Male	Black or African American	Not Hispanic or Latino	178.5	72.6	22.8	1.9	VI
C.3	Cream	Avobenzone	4	0.5		24	Male	Black or African American	Not Hispanic or Latino	178.5	72.6	22.8	1.9	VI
C.3	Cream	Avobenzone	6	0.62		24	Male	Black or African American	Not Hispanic or Latino	178.5	72.6	22.8	1.9	VI
C.3	Cream	Avobenzone	8	0.64		24	Male	Black or African American	Not Hispanic or Latino	178.5	72.6	22.8	1.9	VI
C.3	Cream	Avobenzone	9	0.97		24	Male	Black or African American	Not Hispanic or Latino	178.5	72.6	22.8	1.9	VI
C.3	Cream	Avobenzone	10	0.54		24	Male	Black or African American	Not Hispanic or Latino	178.5	72.6	22.8	1.9	VI
C.3	Cream	Avobenzone	12	1.62		24	Male	Black or African American	Not Hispanic or Latino	178.5	72.6	22.8	1.9	VI
C.3	Cream	Avobenzone	14	1		24	Male	Black or African American	Not Hispanic or Latino	178.5	72.6	22.8	1.9	VI
C.3	Cream	Avobenzone	23	0.37		24	Male	Black or African American	Not Hispanic or Latino	178.5	72.6	22.8	1.9	VI
C.3	Cream	Avobenzone	28	0.61		24	Male	Black or African American	Not Hispanic or Latino	178.5	72.6	22.8	1.9	VI
C.3	Cream	Avobenzone	33	1.36		24	Male	Black or African American	Not Hispanic or Latino	178.5	72.6	22.8	1.9	VI
C.3	Cream	Avobenzone	47	1.11		24	Male	Black or African American	Not Hispanic or Latino	178.5	72.6	22.8	1.9	VI
C.3	Cream	Avobenzone	52	0.98		24	Male	Black or African American	Not Hispanic or Latino	178.5	72.6	22.8	1.9	VI
C.3	Cream	Avobenzone	57	1.79		24	Male	Black or African American	Not Hispanic or Latino	178.5	72.6	22.8	1.9	VI
C.3	Cream	Avobenzone	71	0.9		24	Male	Black or African American	Not Hispanic or Latino	178.5	72.6	22.8	1.9	VI
C.3	Cream	Avobenzone	73	0.86		24	Male	Black or African American	Not Hispanic or Latino	178.5	72.6	22.8	1.9	VI
C.3	Cream	Avobenzone	74	1		24	Male	Black or African American	Not Hispanic or Latino	178.5	72.6	22.8	1.9	VI
C.3	Cream	Avobenzone	76	0.71		24	Male	Black or African American	Not Hispanic or Latino	178.5	72.6	22.8	1.9	VI
C.3	Cream	Avobenzone	78	1.51		24	Male	Black or African American	Not Hispanic or Latino	178.5	72.6	22.8	1.9	VI
C.3	Cream	Avobenzone	81	1.44		24	Male	Black or African American	Not Hispanic or Latino	178.5	72.6	22.8	1.9	VI
C.3	Cream	Avobenzone	82	1.64		24	Male	Black or African American	Not Hispanic or Latino	178.5	72.6	22.8	1.9	VI
C.3	Cream	Avobenzone	84	1.42		24	Male	Black or African American	Not Hispanic or Latino	178.5	72.6	22.8	1.9	VI
C.3	Cream	Avobenzone	86	1.39		24	Male	Black or African American	Not Hispanic or Latino	178.5	72.6	22.8	1.9	VI
C.3	Cream	Avobenzone	95	0.91		24	Male	Black or African American	Not Hispanic or Latino	178.5	72.6	22.8	1.9	VI
C.3	Cream	Avobenzone	120	0.4		24	Male	Black or African American	Not Hispanic or Latino	178.5	72.6	22.8	1.9	VI
C.3	Cream	Avobenzone	144	0.24		24	Male	Black or African American	Not Hispanic or Latino	178.5	72.6	22.8	1.9	VI
C.3	Cream	Ecamsule	0	0	< 0.2	24	Male	Black or African American	Not Hispanic or Latino	178.5	72.6	22.8	1.9	VI
C.3	Cream	Ecamsule	0.5	0	< 0.2	24	Male	Black or African American	Not Hispanic or Latino	178.5	72.6	22.8	1.9	VI
C.3	Cream	Ecamsule	1	0	< 0.2	24	Male	Black or African American	Not Hispanic or Latino	178.5	72.6	22.8	1.9	VI
C.3	Cream	Ecamsule	1.5	0	< 0.2	24	Male	Black or African American	Not Hispanic or Latino	178.5	72.6	22.8	1.9	VI
C.3	Cream	Ecamsule	2	0	< 0.2	24	Male	Black or African American	Not Hispanic or Latino	178.5	72.6	22.8	1.9	VI
C.3	Cream	Ecamsule	4	0	< 0.2	24	Male	Black or African American	Not Hispanic or Latino	178.5	72.6	22.8	1.9	VI
C.3	Cream	Ecamsule	6	0	< 0.2	24	Male	Black or African American	Not Hispanic or Latino	178.5	72.6	22.8	1.9	VI
C.3	Cream	Ecamsule	8	0.64		24	Male	Black or African American	Not Hispanic or Latino	178.5	72.6	22.8	1.9	VI
C.3	Cream	Ecamsule	9	0.47		24	Male	Black or African American	Not Hispanic or Latino	178.5	72.6	22.8	1.9	VI
C.3	Cream	Ecamsule	10	0	< 0.2	24	Male	Black or African American	Not Hispanic or Latino	178.5	72.6	22.8	1.9	VI
C.3	Cream	Ecamsule	12	0.47		24	Male	Black or African American	Not Hispanic or Latino	178.5	72.6	22.8	1.9	VI
C.3	Cream	Ecamsule	14	0	< 0.2	24	Male	Black or African American	Not Hispanic or Latino	178.5	72.6	22.8	1.9	VI
C.3	Cream	Ecamsule	23	0	< 0.2	24	Male	Black or African American	Not Hispanic or Latino	178.5	72.6	22.8	1.9	VI
C.3	Cream	Ecamsule	28	0	< 0.2	24	Male	Black or African American	Not Hispanic or Latino	178.5	72.6	22.8	1.9	VI
C.3	Cream	Ecamsule	33	0.3		24	Male	Black or African American	Not Hispanic or Latino	178.5	72.6	22.8	1.9	VI
C.3	Cream	Ecamsule	47	0.59		24	Male	Black or African American	Not Hispanic or Latino	178.5	72.6	22.8	1.9	VI
C.3	Cream	Ecamsule	52	0	< 0.2	24	Male	Black or African American	Not Hispanic or Latino	178.5	72.6	22.8	1.9	VI
C.3	Cream	Ecamsule	57	0.3		24	Male	Black or African American	Not Hispanic or Latino	178.5	72.6	22.8	1.9	VI
C.3	Cream	Ecamsule	71	0	< 0.2	24	Male	Black or African American	Not Hispanic or Latino	178.5	72.6	22.8	1.9	VI
C.3	Cream	Ecamsule	73	0.22		24	Male	Black or African American	Not Hispanic or Latino	178.5	72.6	22.8	1.9	VI
C.3	Cream	Ecamsule	74	0.41		24	Male	Black or African American	Not Hispanic or Latino	178.5	72.6	22.8	1.9	VI
C.3	Cream	Ecamsule	76	0.25		24	Male	Black or African American	Not Hispanic or Latino	178.5	72.6	22.8	1.9	VI
C.3	Cream	Ecamsule	78	0.5		24	Male	Black or African American	Not Hispanic or Latino	178.5	72.6	22.8	1.9	VI
C.3	Cream	Ecamsule	81	0.51		24	Male	Black or African American	Not Hispanic or Latino	178.5	72.6	22.8	1.9	VI
C.3	Cream	Ecamsule	82	0.38		24	Male	Black or African American	Not Hispanic or Latino	178.5	72.6	22.8	1.9	VI
C.3	Cream	Ecamsule	84	0.23		24	Male	Black or African American	Not Hispanic or Latino	178.5	72.6	22.8	1.9	VI
C.3	Cream	Ecamsule	86	0.22		24	Male	Black or African American	Not Hispanic or Latino	178.5	72.6	22.8	1.9	VI
C.3	Cream	Ecamsule	95	0	< 0.2	24	Male	Black or African American	Not Hispanic or Latino	178.5	72.6	22.8	1.9	VI
C.3	Cream	Ecamsule	120	0	< 0.2	24	Male	Black or African American	Not Hispanic or Latino	178.5	72.6	22.8	1.9	VI
C.3	Cream	Ecamsule	144	0	< 0.2	24	Male	Black or African American	Not Hispanic or Latino	178.5	72.6	22.8	1.9	VI
C.3	Cream	Octocrylene	0	0	< 0.4	24	Male	Black or African American	Not Hispanic or Latino	178.5	72.6	22.8	1.9	VI
C.3	Cream	Octocrylene	0.5	0	< 0.4	24	Male	Black or African American	Not Hispanic or Latino	178.5	72.6	22.8	1.9	VI
C.3	Cream	Octocrylene	1	0	< 0.4	24	Male	Black or African American	Not Hispanic or Latino	178.5	72.6	22.8	1.9	VI
C.3	Cream	Octocrylene	1.5	0	< 0.4	24	Male	Black or African American	Not Hispanic or Latino	178.5	72.6	22.8	1.9	VI
C.3	Cream	Octocrylene	2	0	< 0.4	24	Male	Black or African American	Not Hispanic or Latino	178.5	72.6	22.8	1.9	VI
C.3	Cream	Octocrylene	4	1.21		24	Male	Black or African American	Not Hispanic or Latino	178.5	72.6	22.8	1.9	VI
C.3	Cream	Octocrylene	6	1.09		24	Male	Black or African American	Not Hispanic or Latino	178.5	72.6	22.8	1.9	VI
C.3	Cream	Octocrylene	8	1.99		24	Male	Black or African American	Not Hispanic or Latino	178.5	72.6	22.8	1.9	VI
C.3	Cream	Octocrylene	9	1.64		24	Male	Black or African American	Not Hispanic or Latino	178.5	72.6	22.8	1.9	VI
C.3	Cream	Octocrylene	10	1.48		24	Male	Black or African American	Not Hispanic or Latino	178.5	72.6	22.8	1.9	VI
C.3	Cream	Octocrylene	12	3.85		24	Male	Black or African American	Not Hispanic or Latino	178.5	72.6	22.8	1.9	VI
C.3	Cream	Octocrylene	14	2.15		24	Male	Black or African American	Not Hispanic or Latino	178.5	72.6	22.8	1.9	VI
C.3	Cream	Octocrylene	23	1.29		24	Male	Black or African American	Not Hispanic or Latino	178.5	72.6	22.8	1.9	VI
C.3	Cream	Octocrylene	28	1.34		24	Male	Black or African American	Not Hispanic or Latino	178.5	72.6	22.8	1.9	VI
C.3	Cream	Octocrylene	33	2.69		24	Male	Black or African American	Not Hispanic or Latino	178.5	72.6	22.8	1.9	VI
C.3	Cream	Octocrylene	47	2.42		24	Male	Black or African American	Not Hispanic or Latino	178.5	72.6	22.8	1.9	VI
C.3	Cream	Octocrylene	52	1.64		24	Male	Black or African American	Not Hispanic or Latino	178.5	72.6	22.8	1.9	VI
C.3	Cream	Octocrylene	57	3.22		24	Male	Black or African American	Not Hispanic or Latino	178.5	72.6	22.8	1.9	VI
C.3	Cream	Octocrylene	71	2.14		24	Male	Black or African American	Not Hispanic or Latino	178.5	72.6	22.8	1.9	VI
C.3	Cream	Octocrylene	73	2.23		24	Male	Black or African American	Not Hispanic or Latino	178.5	72.6	22.8	1.9	VI
C.3	Cream	Octocrylene	74	8.51		24	Male	Black or African American	Not Hispanic or Latino	178.5	72.6	22.8	1.9	VI
C.3	Cream	Octocrylene	76	1.44		24	Male	Black or African American	Not Hispanic or Latino	178.5	72.6	22.8	1.9	VI
C.3	Cream	Octocrylene	78	2.68		24	Male	Black or African American	Not Hispanic or Latino	178.5	72.6	22.8	1.9	VI
C.3	Cream	Octocrylene	81	3.82		24	Male	Black or African American	Not Hispanic or Latino	178.5	72.6	22.8	1.9	VI
C.3	Cream	Octocrylene	82	2.86		24	Male	Black or African American	Not Hispanic or Latino	178.5	72.6	22.8	1.9	VI
C.3	Cream	Octocrylene	84	3.18		24	Male	Black or African American	Not Hispanic or Latino	178.5	72.6	22.8	1.9	VI
C.3	Cream	Octocrylene	86	2.71		24	Male	Black or African American	Not Hispanic or Latino	178.5	72.6	22.8	1.9	VI
C.3	Cream	Octocrylene	95	1.69		24	Male	Black or African American	Not Hispanic or Latino	178.5	72.6	22.8	1.9	VI
C.3	Cream	Octocrylene	120	1.06		24	Male	Black or African American	Not Hispanic or Latino	178.5	72.6	22.8	1.9	VI
C.3	Cream	Octocrylene	144	0.91		24	Male	Black or African American	Not Hispanic or Latino	178.5	72.6	22.8	1.9	VI
C.4	Cream	Avobenzone	0	0	< 0.2	33	Female	Black or African American	Hispanic or Latino	169.5	77.8	27.1	1.91	V
C.4	Cream	Avobenzone	0.5	0	< 0.2	33	Female	Black or African American	Hispanic or Latino	169.5	77.8	27.1	1.91	V
C.4	Cream	Avobenzone	1	0	< 0.2	33	Female	Black or African American	Hispanic or Latino	169.5	77.8	27.1	1.91	V
C.4	Cream	Avobenzone	1.5	0	< 0.2	33	Female	Black or African American	Hispanic or Latino	169.5	77.8	27.1	1.91	V
C.4	Cream	Avobenzone	2	0	< 0.2	33	Female	Black or African American	Hispanic or Latino	169.5	77.8	27.1	1.91	V
C.4	Cream	Avobenzone	4	0.27		33	Female	Black or African American	Hispanic or Latino	169.5	77.8	27.1	1.91	V
C.4	Cream	Avobenzone	6	0.3		33	Female	Black or African American	Hispanic or Latino	169.5	77.8	27.1	1.91	V
C.4	Cream	Avobenzone	8	0.49		33	Female	Black or African American	Hispanic or Latino	169.5	77.8	27.1	1.91	V
C.4	Cream	Avobenzone	9	0.52		33	Female	Black or African American	Hispanic or Latino	169.5	77.8	27.1	1.91	V
C.4	Cream	Avobenzone	10	0.52		33	Female	Black or African American	Hispanic or Latino	169.5	77.8	27.1	1.91	V
C.4	Cream	Avobenzone	12	0.31		33	Female	Black or African American	Hispanic or Latino	169.5	77.8	27.1	1.91	V
C.4	Cream	Avobenzone	14	0.26		33	Female	Black or African American	Hispanic or Latino	169.5	77.8	27.1	1.91	V
C.4	Cream	Avobenzone	23	0.2		33	Female	Black or African American	Hispanic or Latino	169.5	77.8	27.1	1.91	V
C.4	Cream	Avobenzone	28	0.6		33	Female	Black or African American	Hispanic or Latino	169.5	77.8	27.1	1.91	V
C.4	Cream	Avobenzone	33	1.08		33	Female	Black or African American	Hispanic or Latino	169.5	77.8	27.1	1.91	V
C.4	Cream	Avobenzone	47	0.58		33	Female	Black or African American	Hispanic or Latino	169.5	77.8	27.1	1.91	V
C.4	Cream	Avobenzone	52	0.63		33	Female	Black or African American	Hispanic or Latino	169.5	77.8	27.1	1.91	V
C.4	Cream	Avobenzone	57	0.91		33	Female	Black or African American	Hispanic or Latino	169.5	77.8	27.1	1.91	V
C.4	Cream	Avobenzone	71	0.52		33	Female	Black or African American	Hispanic or Latino	169.5	77.8	27.1	1.91	V
C.4	Cream	Avobenzone	73	0.34		33	Female	Black or African American	Hispanic or Latino	169.5	77.8	27.1	1.91	V
C.4	Cream	Avobenzone	74	0.49		33	Female	Black or African American	Hispanic or Latino	169.5	77.8	27.1	1.91	V
C.4	Cream	Avobenzone	76	0.61		33	Female	Black or African American	Hispanic or Latino	169.5	77.8	27.1	1.91	V
C.4	Cream	Avobenzone	78	0.8		33	Female	Black or African American	Hispanic or Latino	169.5	77.8	27.1	1.91	V
C.4	Cream	Avobenzone	81	0.98		33	Female	Black or African American	Hispanic or Latino	169.5	77.8	27.1	1.91	V
C.4	Cream	Avobenzone	82	0.67		33	Female	Black or African American	Hispanic or Latino	169.5	77.8	27.1	1.91	V
C.4	Cream	Avobenzone	84	0.4		33	Female	Black or African American	Hispanic or Latino	169.5	77.8	27.1	1.91	V
C.4	Cream	Avobenzone	86	0.74		33	Female	Black or African American	Hispanic or Latino	169.5	77.8	27.1	1.91	V
C.4	Cream	Avobenzone	95	0.54		33	Female	Black or African American	Hispanic or Latino	169.5	77.8	27.1	1.91	V
C.4	Cream	Avobenzone	120	0.3		33	Female	Black or African American	Hispanic or Latino	169.5	77.8	27.1	1.91	V
C.4	Cream	Avobenzone	144	0.21		33	Female	Black or African American	Hispanic or Latino	169.5	77.8	27.1	1.91	V
C.4	Cream	Ecamsule	0	0	< 0.2	33	Female	Black or African American	Hispanic or Latino	169.5	77.8	27.1	1.91	V
C.4	Cream	Ecamsule	0.5	0	< 0.2	33	Female	Black or African American	Hispanic or Latino	169.5	77.8	27.1	1.91	V
C.4	Cream	Ecamsule	1	0	< 0.2	33	Female	Black or African American	Hispanic or Latino	169.5	77.8	27.1	1.91	V
C.4	Cream	Ecamsule	1.5	0	< 0.2	33	Female	Black or African American	Hispanic or Latino	169.5	77.8	27.1	1.91	V
C.4	Cream	Ecamsule	2	0	< 0.2	33	Female	Black or African American	Hispanic or Latino	169.5	77.8	27.1	1.91	V
C.4	Cream	Ecamsule	4	0	< 0.2	33	Female	Black or African American	Hispanic or Latino	169.5	77.8	27.1	1.91	V
C.4	Cream	Ecamsule	6	0	< 0.2	33	Female	Black or African American	Hispanic or Latino	169.5	77.8	27.1	1.91	V
C.4	Cream	Ecamsule	8	0.56		33	Female	Black or African American	Hispanic or Latino	169.5	77.8	27.1	1.91	V
C.4	Cream	Ecamsule	9	0.56		33	Female	Black or African American	Hispanic or Latino	169.5	77.8	27.1	1.91	V
C.4	Cream	Ecamsule	10	0	< 0.2	33	Female	Black or African American	Hispanic or Latino	169.5	77.8	27.1	1.91	V
C.4	Cream	Ecamsule	12	0.87		33	Female	Black or African American	Hispanic or Latino	169.5	77.8	27.1	1.91	V
C.4	Cream	Ecamsule	14	0	< 0.2	33	Female	Black or African American	Hispanic or Latino	169.5	77.8	27.1	1.91	V
C.4	Cream	Ecamsule	23	0	< 0.2	33	Female	Black or African American	Hispanic or Latino	169.5	77.8	27.1	1.91	V
C.4	Cream	Ecamsule	28	1.1		33	Female	Black or African American	Hispanic or Latino	169.5	77.8	27.1	1.91	V
C.4	Cream	Ecamsule	33	2		33	Female	Black or African American	Hispanic or Latino	169.5	77.8	27.1	1.91	V
C.4	Cream	Ecamsule	47	0.77		33	Female	Black or African American	Hispanic or Latino	169.5	77.8	27.1	1.91	V
C.4	Cream	Ecamsule	52	0.35		33	Female	Black or African American	Hispanic or Latino	169.5	77.8	27.1	1.91	V
C.4	Cream	Ecamsule	57	0.75		33	Female	Black or African American	Hispanic or Latino	169.5	77.8	27.1	1.91	V
C.4	Cream	Ecamsule	71	0.22		33	Female	Black or African American	Hispanic or Latino	169.5	77.8	27.1	1.91	V
C.4	Cream	Ecamsule	73	0	< 0.2	33	Female	Black or African American	Hispanic or Latino	169.5	77.8	27.1	1.91	V
C.4	Cream	Ecamsule	74	0	< 0.2	33	Female	Black or African American	Hispanic or Latino	169.5	77.8	27.1	1.91	V
C.4	Cream	Ecamsule	76	0	< 0.2	33	Female	Black or African American	Hispanic or Latino	169.5	77.8	27.1	1.91	V
C.4	Cream	Ecamsule	78	0	< 0.2	33	Female	Black or African American	Hispanic or Latino	169.5	77.8	27.1	1.91	V
C.4	Cream	Ecamsule	81	1.08		33	Female	Black or African American	Hispanic or Latino	169.5	77.8	27.1	1.91	V
C.4	Cream	Ecamsule	82	0.6		33	Female	Black or African American	Hispanic or Latino	169.5	77.8	27.1	1.91	V
C.4	Cream	Ecamsule	84	0	< 0.2	33	Female	Black or African American	Hispanic or Latino	169.5	77.8	27.1	1.91	V
C.4	Cream	Ecamsule	86	0.32		33	Female	Black or African American	Hispanic or Latino	169.5	77.8	27.1	1.91	V
C.4	Cream	Ecamsule	95	0	< 0.2	33	Female	Black or African American	Hispanic or Latino	169.5	77.8	27.1	1.91	V
C.4	Cream	Ecamsule	120	0	< 0.2	33	Female	Black or African American	Hispanic or Latino	169.5	77.8	27.1	1.91	V
C.4	Cream	Ecamsule	144	0	< 0.2	33	Female	Black or African American	Hispanic or Latino	169.5	77.8	27.1	1.91	V
C.4	Cream	Octocrylene	0	0	< 0.4	33	Female	Black or African American	Hispanic or Latino	169.5	77.8	27.1	1.91	V
C.4	Cream	Octocrylene	0.5	0	< 0.4	33	Female	Black or African American	Hispanic or Latino	169.5	77.8	27.1	1.91	V
C.4	Cream	Octocrylene	1	0	< 0.4	33	Female	Black or African American	Hispanic or Latino	169.5	77.8	27.1	1.91	V
C.4	Cream	Octocrylene	1.5	0	< 0.4	33	Female	Black or African American	Hispanic or Latino	169.5	77.8	27.1	1.91	V
C.4	Cream	Octocrylene	2	0	< 0.4	33	Female	Black or African American	Hispanic or Latino	169.5	77.8	27.1	1.91	V
C.4	Cream	Octocrylene	4	0.86		33	Female	Black or African American	Hispanic or Latino	169.5	77.8	27.1	1.91	V
C.4	Cream	Octocrylene	6	0.69		33	Female	Black or African American	Hispanic or Latino	169.5	77.8	27.1	1.91	V
C.4	Cream	Octocrylene	8	1.62		33	Female	Black or African American	Hispanic or Latino	169.5	77.8	27.1	1.91	V
C.4	Cream	Octocrylene	9	1.27		33	Female	Black or African American	Hispanic or Latino	169.5	77.8	27.1	1.91	V
C.4	Cream	Octocrylene	10	1.21		33	Female	Black or African American	Hispanic or Latino	169.5	77.8	27.1	1.91	V
C.4	Cream	Octocrylene	12	1.56		33	Female	Black or African American	Hispanic or Latino	169.5	77.8	27.1	1.91	V
C.4	Cream	Octocrylene	14	0.92		33	Female	Black or African American	Hispanic or Latino	169.5	77.8	27.1	1.91	V
C.4	Cream	Octocrylene	23	0.57		33	Female	Black or African American	Hispanic or Latino	169.5	77.8	27.1	1.91	V
C.4	Cream	Octocrylene	28	1.89		33	Female	Black or African American	Hispanic or Latino	169.5	77.8	27.1	1.91	V
C.4	Cream	Octocrylene	33	1.94		33	Female	Black or African American	Hispanic or Latino	169.5	77.8	27.1	1.91	V
C.4	Cream	Octocrylene	47	1.55		33	Female	Black or African American	Hispanic or Latino	169.5	77.8	27.1	1.91	V
C.4	Cream	Octocrylene	52	1.65		33	Female	Black or African American	Hispanic or Latino	169.5	77.8	27.1	1.91	V
C.4	Cream	Octocrylene	57	2.9		33	Female	Black or African American	Hispanic or Latino	169.5	77.8	27.1	1.91	V
C.4	Cream	Octocrylene	71	1.49		33	Female	Black or African American	Hispanic or Latino	169.5	77.8	27.1	1.91	V
C.4	Cream	Octocrylene	73	1.08		33	Female	Black or African American	Hispanic or Latino	169.5	77.8	27.1	1.91	V
C.4	Cream	Octocrylene	74	1.25		33	Female	Black or African American	Hispanic or Latino	169.5	77.8	27.1	1.91	V
C.4	Cream	Octocrylene	76	1.42		33	Female	Black or African American	Hispanic or Latino	169.5	77.8	27.1	1.91	V
C.4	Cream	Octocrylene	78	2.2		33	Female	Black or African American	Hispanic or Latino	169.5	77.8	27.1	1.91	V
C.4	Cream	Octocrylene	81	2.04		33	Female	Black or African American	Hispanic or Latino	169.5	77.8	27.1	1.91	V
C.4	Cream	Octocrylene	82	2.36		33	Female	Black or African American	Hispanic or Latino	169.5	77.8	27.1	1.91	V
C.4	Cream	Octocrylene	84	1.34		33	Female	Black or African American	Hispanic or Latino	169.5	77.8	27.1	1.91	V
C.4	Cream	Octocrylene	86	1.52		33	Female	Black or African American	Hispanic or Latino	169.5	77.8	27.1	1.91	V
C.4	Cream	Octocrylene	95	1.46		33	Female	Black or African American	Hispanic or Latino	169.5	77.8	27.1	1.91	V
C.4	Cream	Octocrylene	120	0.87		33	Female	Black or African American	Hispanic or Latino	169.5	77.8	27.1	1.91	V
C.4	Cream	Octocrylene	144	0.75		33	Female	Black or African American	Hispanic or Latino	169.5	77.8	27.1	1.91	V
C.5	Cream	Avobenzone	0	0	< 0.2	33	Male	Black or African American	Not Hispanic or Latino	173.5	88	29.2	2.06	VI
C.5	Cream	Avobenzone	0.5	0	< 0.2	33	Male	Black or African American	Not Hispanic or Latino	173.5	88	29.2	2.06	VI
C.5	Cream	Avobenzone	1	0	< 0.2	33	Male	Black or African American	Not Hispanic or Latino	173.5	88	29.2	2.06	VI
C.5	Cream	Avobenzone	1.5	0	< 0.2	33	Male	Black or African American	Not Hispanic or Latino	173.5	88	29.2	2.06	VI
C.5	Cream	Avobenzone	2	0	< 0.2	33	Male	Black or African American	Not Hispanic or Latino	173.5	88	29.2	2.06	VI
C.5	Cream	Avobenzone	4	0.42		33	Male	Black or African American	Not Hispanic or Latino	173.5	88	29.2	2.06	VI
C.5	Cream	Avobenzone	6	0.39		33	Male	Black or African American	Not Hispanic or Latino	173.5	88	29.2	2.06	VI
C.5	Cream	Avobenzone	8	0.5		33	Male	Black or African American	Not Hispanic or Latino	173.5	88	29.2	2.06	VI
C.5	Cream	Avobenzone	9	0.64		33	Male	Black or African American	Not Hispanic or Latino	173.5	88	29.2	2.06	VI
C.5	Cream	Avobenzone	10	0.78		33	Male	Black or African American	Not Hispanic or Latino	173.5	88	29.2	2.06	VI
C.5	Cream	Avobenzone	12	0.55		33	Male	Black or African American	Not Hispanic or Latino	173.5	88	29.2	2.06	VI
C.5	Cream	Avobenzone	14	0.6		33	Male	Black or African American	Not Hispanic or Latino	173.5	88	29.2	2.06	VI
C.5	Cream	Avobenzone	23	0.46		33	Male	Black or African American	Not Hispanic or Latino	173.5	88	29.2	2.06	VI
C.5	Cream	Avobenzone	28	0.75		33	Male	Black or African American	Not Hispanic or Latino	173.5	88	29.2	2.06	VI
C.5	Cream	Avobenzone	33	1.13		33	Male	Black or African American	Not Hispanic or Latino	173.5	88	29.2	2.06	VI
C.5	Cream	Avobenzone	47	0.87		33	Male	Black or African American	Not Hispanic or Latino	173.5	88	29.2	2.06	VI
C.5	Cream	Avobenzone	52	1.02		33	Male	Black or African American	Not Hispanic or Latino	173.5	88	29.2	2.06	VI
C.5	Cream	Avobenzone	57	1.32		33	Male	Black or African American	Not Hispanic or Latino	173.5	88	29.2	2.06	VI
C.5	Cream	Avobenzone	71	0.68		33	Male	Black or African American	Not Hispanic or Latino	173.5	88	29.2	2.06	VI
C.5	Cream	Avobenzone	73	1.19		33	Male	Black or African American	Not Hispanic or Latino	173.5	88	29.2	2.06	VI
C.5	Cream	Avobenzone	74	0.94		33	Male	Black or African American	Not Hispanic or Latino	173.5	88	29.2	2.06	VI
C.5	Cream	Avobenzone	76	1.22		33	Male	Black or African American	Not Hispanic or Latino	173.5	88	29.2	2.06	VI
C.5	Cream	Avobenzone	78	1.01		33	Male	Black or African American	Not Hispanic or Latino	173.5	88	29.2	2.06	VI
C.5	Cream	Avobenzone	81	1.43		33	Male	Black or African American	Not Hispanic or Latino	173.5	88	29.2	2.06	VI
C.5	Cream	Avobenzone	82	1.43		33	Male	Black or African American	Not Hispanic or Latino	173.5	88	29.2	2.06	VI
C.5	Cream	Avobenzone	84	1.02		33	Male	Black or African American	Not Hispanic or Latino	173.5	88	29.2	2.06	VI
C.5	Cream	Avobenzone	86	1.64		33	Male	Black or African American	Not Hispanic or Latino	173.5	88	29.2	2.06	VI
C.5	Cream	Avobenzone	95	0.9		33	Male	Black or African American	Not Hispanic or Latino	173.5	88	29.2	2.06	VI
C.5	Cream	Avobenzone	120	0.31		33	Male	Black or African American	Not Hispanic or Latino	173.5	88	29.2	2.06	VI
C.5	Cream	Avobenzone	144	0.2		33	Male	Black or African American	Not Hispanic or Latino	173.5	88	29.2	2.06	VI
C.5	Cream	Ecamsule	0	0	< 0.2	33	Male	Black or African American	Not Hispanic or Latino	173.5	88	29.2	2.06	VI
C.5	Cream	Ecamsule	0.5	0.29		33	Male	Black or African American	Not Hispanic or Latino	173.5	88	29.2	2.06	VI
C.5	Cream	Ecamsule	1	0	< 0.2	33	Male	Black or African American	Not Hispanic or Latino	173.5	88	29.2	2.06	VI
C.5	Cream	Ecamsule	1.5	0	< 0.2	33	Male	Black or African American	Not Hispanic or Latino	173.5	88	29.2	2.06	VI
C.5	Cream	Ecamsule	2	0	< 0.2	33	Male	Black or African American	Not Hispanic or Latino	173.5	88	29.2	2.06	VI
C.5	Cream	Ecamsule	4	0.61		33	Male	Black or African American	Not Hispanic or Latino	173.5	88	29.2	2.06	VI
C.5	Cream	Ecamsule	6	0.51		33	Male	Black or African American	Not Hispanic or Latino	173.5	88	29.2	2.06	VI
C.5	Cream	Ecamsule	8	0.86		33	Male	Black or African American	Not Hispanic or Latino	173.5	88	29.2	2.06	VI
C.5	Cream	Ecamsule	9	0.64		33	Male	Black or African American	Not Hispanic or Latino	173.5	88	29.2	2.06	VI
C.5	Cream	Ecamsule	10	0.97		33	Male	Black or African American	Not Hispanic or Latino	173.5	88	29.2	2.06	VI
C.5	Cream	Ecamsule	12	0.3		33	Male	Black or African American	Not Hispanic or Latino	173.5	88	29.2	2.06	VI
C.5	Cream	Ecamsule	14	0.33		33	Male	Black or African American	Not Hispanic or Latino	173.5	88	29.2	2.06	VI
C.5	Cream	Ecamsule	23	0	< 0.2	33	Male	Black or African American	Not Hispanic or Latino	173.5	88	29.2	2.06	VI
C.5	Cream	Ecamsule	28	0.69		33	Male	Black or African American	Not Hispanic or Latino	173.5	88	29.2	2.06	VI
C.5	Cream	Ecamsule	33	0.43		33	Male	Black or African American	Not Hispanic or Latino	173.5	88	29.2	2.06	VI
C.5	Cream	Ecamsule	47	0	< 0.2	33	Male	Black or African American	Not Hispanic or Latino	173.5	88	29.2	2.06	VI
C.5	Cream	Ecamsule	52	0.35		33	Male	Black or African American	Not Hispanic or Latino	173.5	88	29.2	2.06	VI
C.5	Cream	Ecamsule	57	0.64		33	Male	Black or African American	Not Hispanic or Latino	173.5	88	29.2	2.06	VI
C.5	Cream	Ecamsule	71	0	< 0.2	33	Male	Black or African American	Not Hispanic or Latino	173.5	88	29.2	2.06	VI
C.5	Cream	Ecamsule	73	0.5		33	Male	Black or African American	Not Hispanic or Latino	173.5	88	29.2	2.06	VI
C.5	Cream	Ecamsule	74	0	< 0.2	33	Male	Black or African American	Not Hispanic or Latino	173.5	88	29.2	2.06	VI
C.5	Cream	Ecamsule	76	0.39		33	Male	Black or African American	Not Hispanic or Latino	173.5	88	29.2	2.06	VI
C.5	Cream	Ecamsule	78	0.73		33	Male	Black or African American	Not Hispanic or Latino	173.5	88	29.2	2.06	VI
C.5	Cream	Ecamsule	81	0.37		33	Male	Black or African American	Not Hispanic or Latino	173.5	88	29.2	2.06	VI
C.5	Cream	Ecamsule	82	0.34		33	Male	Black or African American	Not Hispanic or Latino	173.5	88	29.2	2.06	VI
C.5	Cream	Ecamsule	84	0	< 0.2	33	Male	Black or African American	Not Hispanic or Latino	173.5	88	29.2	2.06	VI
C.5	Cream	Ecamsule	86	0	< 0.2	33	Male	Black or African American	Not Hispanic or Latino	173.5	88	29.2	2.06	VI
C.5	Cream	Ecamsule	95	0	< 0.2	33	Male	Black or African American	Not Hispanic or Latino	173.5	88	29.2	2.06	VI
C.5	Cream	Ecamsule	120	0	< 0.2	33	Male	Black or African American	Not Hispanic or Latino	173.5	88	29.2	2.06	VI
C.5	Cream	Ecamsule	144	0	< 0.2	33	Male	Black or African American	Not Hispanic or Latino	173.5	88	29.2	2.06	VI
C.5	Cream	Octocrylene	0	0	< 0.4	33	Male	Black or African American	Not Hispanic or Latino	173.5	88	29.2	2.06	VI
C.5	Cream	Octocrylene	0.5	0	< 0.4	33	Male	Black or African American	Not Hispanic or Latino	173.5	88	29.2	2.06	VI
C.5	Cream	Octocrylene	1	0	< 0.4	33	Male	Black or African American	Not Hispanic or Latino	173.5	88	29.2	2.06	VI
C.5	Cream	Octocrylene	1.5	0	< 0.4	33	Male	Black or African American	Not Hispanic or Latino	173.5	88	29.2	2.06	VI
C.5	Cream	Octocrylene	2	0	< 0.4	33	Male	Black or African American	Not Hispanic or Latino	173.5	88	29.2	2.06	VI
C.5	Cream	Octocrylene	4	1.2		33	Male	Black or African American	Not Hispanic or Latino	173.5	88	29.2	2.06	VI
C.5	Cream	Octocrylene	6	0.94		33	Male	Black or African American	Not Hispanic or Latino	173.5	88	29.2	2.06	VI
C.5	Cream	Octocrylene	8	1.41		33	Male	Black or African American	Not Hispanic or Latino	173.5	88	29.2	2.06	VI
C.5	Cream	Octocrylene	9	1.79		33	Male	Black or African American	Not Hispanic or Latino	173.5	88	29.2	2.06	VI
C.5	Cream	Octocrylene	10	2.43		33	Male	Black or African American	Not Hispanic or Latino	173.5	88	29.2	2.06	VI
C.5	Cream	Octocrylene	12	1.6		33	Male	Black or African American	Not Hispanic or Latino	173.5	88	29.2	2.06	VI
C.5	Cream	Octocrylene	14	1.48		33	Male	Black or African American	Not Hispanic or Latino	173.5	88	29.2	2.06	VI
C.5	Cream	Octocrylene	23	1.76		33	Male	Black or African American	Not Hispanic or Latino	173.5	88	29.2	2.06	VI
C.5	Cream	Octocrylene	28	2.34		33	Male	Black or African American	Not Hispanic or Latino	173.5	88	29.2	2.06	VI
C.5	Cream	Octocrylene	33	2.34		33	Male	Black or African American	Not Hispanic or Latino	173.5	88	29.2	2.06	VI
C.5	Cream	Octocrylene	47	2.24		33	Male	Black or African American	Not Hispanic or Latino	173.5	88	29.2	2.06	VI
C.5	Cream	Octocrylene	52	3.35		33	Male	Black or African American	Not Hispanic or Latino	173.5	88	29.2	2.06	VI
C.5	Cream	Octocrylene	57	4.17		33	Male	Black or African American	Not Hispanic or Latino	173.5	88	29.2	2.06	VI
C.5	Cream	Octocrylene	71	1.75		33	Male	Black or African American	Not Hispanic or Latino	173.5	88	29.2	2.06	VI
C.5	Cream	Octocrylene	73	4.79		33	Male	Black or African American	Not Hispanic or Latino	173.5	88	29.2	2.06	VI
C.5	Cream	Octocrylene	74	2.39		33	Male	Black or African American	Not Hispanic or Latino	173.5	88	29.2	2.06	VI
C.5	Cream	Octocrylene	76	3.53		33	Male	Black or African American	Not Hispanic or Latino	173.5	88	29.2	2.06	VI
C.5	Cream	Octocrylene	78	4.16		33	Male	Black or African American	Not Hispanic or Latino	173.5	88	29.2	2.06	VI
C.5	Cream	Octocrylene	81	2.8		33	Male	Black or African American	Not Hispanic or Latino	173.5	88	29.2	2.06	VI
C.5	Cream	Octocrylene	82	3.42		33	Male	Black or African American	Not Hispanic or Latino	173.5	88	29.2	2.06	VI
C.5	Cream	Octocrylene	84	3.05		33	Male	Black or African American	Not Hispanic or Latino	173.5	88	29.2	2.06	VI
C.5	Cream	Octocrylene	86	2.96		33	Male	Black or African American	Not Hispanic or Latino	173.5	88	29.2	2.06	VI
C.5	Cream	Octocrylene	95	2.52		33	Male	Black or African American	Not Hispanic or Latino	173.5	88	29.2	2.06	VI
C.5	Cream	Octocrylene	120	1.27		33	Male	Black or African American	Not Hispanic or Latino	173.5	88	29.2	2.06	VI
C.5	Cream	Octocrylene	144	1.25		33	Male	Black or African American	Not Hispanic or Latino	173.5	88	29.2	2.06	VI
C.6	Cream	Avobenzone	0	0	< 0.2	23	Female	Black or African American	Not Hispanic or Latino	177.5	91.6	29.1	2.13	V
C.6	Cream	Avobenzone	0.5	0	< 0.2	23	Female	Black or African American	Not Hispanic or Latino	177.5	91.6	29.1	2.13	V
C.6	Cream	Avobenzone	1	0	< 0.2	23	Female	Black or African American	Not Hispanic or Latino	177.5	91.6	29.1	2.13	V
C.6	Cream	Avobenzone	1.5	0	< 0.2	23	Female	Black or African American	Not Hispanic or Latino	177.5	91.6	29.1	2.13	V
C.6	Cream	Avobenzone	2	0	< 0.2	23	Female	Black or African American	Not Hispanic or Latino	177.5	91.6	29.1	2.13	V
C.6	Cream	Avobenzone	4	0.33		23	Female	Black or African American	Not Hispanic or Latino	177.5	91.6	29.1	2.13	V
C.6	Cream	Avobenzone	6	0.31		23	Female	Black or African American	Not Hispanic or Latino	177.5	91.6	29.1	2.13	V
C.6	Cream	Avobenzone	8	0.78		23	Female	Black or African American	Not Hispanic or Latino	177.5	91.6	29.1	2.13	V
C.6	Cream	Avobenzone	9	1.02		23	Female	Black or African American	Not Hispanic or Latino	177.5	91.6	29.1	2.13	V
C.6	Cream	Avobenzone	10	1.38		23	Female	Black or African American	Not Hispanic or Latino	177.5	91.6	29.1	2.13	V
C.6	Cream	Avobenzone	12	1.05		23	Female	Black or African American	Not Hispanic or Latino	177.5	91.6	29.1	2.13	V
C.6	Cream	Avobenzone	14	0.64		23	Female	Black or African American	Not Hispanic or Latino	177.5	91.6	29.1	2.13	V
C.6	Cream	Avobenzone	23	0.7		23	Female	Black or African American	Not Hispanic or Latino	177.5	91.6	29.1	2.13	V
C.6	Cream	Avobenzone	28	0.64		23	Female	Black or African American	Not Hispanic or Latino	177.5	91.6	29.1	2.13	V
C.6	Cream	Avobenzone	33	1.8		23	Female	Black or African American	Not Hispanic or Latino	177.5	91.6	29.1	2.13	V
C.6	Cream	Avobenzone	47	1.03		23	Female	Black or African American	Not Hispanic or Latino	177.5	91.6	29.1	2.13	V
C.6	Cream	Avobenzone	71	0.5		23	Female	Black or African American	Not Hispanic or Latino	177.5	91.6	29.1	2.13	V
C.6	Cream	Ecamsule	0	0	< 0.2	23	Female	Black or African American	Not Hispanic or Latino	177.5	91.6	29.1	2.13	V
C.6	Cream	Ecamsule	0.5	0	< 0.2	23	Female	Black or African American	Not Hispanic or Latino	177.5	91.6	29.1	2.13	V
C.6	Cream	Ecamsule	1	0	< 0.2	23	Female	Black or African American	Not Hispanic or Latino	177.5	91.6	29.1	2.13	V
C.6	Cream	Ecamsule	1.5	0	< 0.2	23	Female	Black or African American	Not Hispanic or Latino	177.5	91.6	29.1	2.13	V
C.6	Cream	Ecamsule	2	0	< 0.2	23	Female	Black or African American	Not Hispanic or Latino	177.5	91.6	29.1	2.13	V
C.6	Cream	Ecamsule	4	0.36		23	Female	Black or African American	Not Hispanic or Latino	177.5	91.6	29.1	2.13	V
C.6	Cream	Ecamsule	6	0	< 0.2	23	Female	Black or African American	Not Hispanic or Latino	177.5	91.6	29.1	2.13	V
C.6	Cream	Ecamsule	8	0	< 0.2	23	Female	Black or African American	Not Hispanic or Latino	177.5	91.6	29.1	2.13	V
C.6	Cream	Ecamsule	9	0	< 0.2	23	Female	Black or African American	Not Hispanic or Latino	177.5	91.6	29.1	2.13	V
C.6	Cream	Ecamsule	10	1.35		23	Female	Black or African American	Not Hispanic or Latino	177.5	91.6	29.1	2.13	V
C.6	Cream	Ecamsule	12	0.34		23	Female	Black or African American	Not Hispanic or Latino	177.5	91.6	29.1	2.13	V
C.6	Cream	Ecamsule	14	0	< 0.2	23	Female	Black or African American	Not Hispanic or Latino	177.5	91.6	29.1	2.13	V
C.6	Cream	Ecamsule	23	0.3		23	Female	Black or African American	Not Hispanic or Latino	177.5	91.6	29.1	2.13	V
C.6	Cream	Ecamsule	28	0.26		23	Female	Black or African American	Not Hispanic or Latino	177.5	91.6	29.1	2.13	V
C.6	Cream	Ecamsule	33	1.62		23	Female	Black or African American	Not Hispanic or Latino	177.5	91.6	29.1	2.13	V
C.6	Cream	Ecamsule	47	0.28		23	Female	Black or African American	Not Hispanic or Latino	177.5	91.6	29.1	2.13	V
C.6	Cream	Ecamsule	144	0	< 0.2	23	Female	Black or African American	Not Hispanic or Latino	177.5	91.6	29.1	2.13	V
C.6	Cream	Octocrylene	0	0	< 0.4	23	Female	Black or African American	Not Hispanic or Latino	177.5	91.6	29.1	2.13	V
C.6	Cream	Octocrylene	0.5	0	< 0.4	23	Female	Black or African American	Not Hispanic or Latino	177.5	91.6	29.1	2.13	V
C.6	Cream	Octocrylene	1	0	< 0.4	23	Female	Black or African American	Not Hispanic or Latino	177.5	91.6	29.1	2.13	V
C.6	Cream	Octocrylene	1.5	0	< 0.4	23	Female	Black or African American	Not Hispanic or Latino	177.5	91.6	29.1	2.13	V
C.6	Cream	Octocrylene	2	0	< 0.4	23	Female	Black or African American	Not Hispanic or Latino	177.5	91.6	29.1	2.13	V
C.6	Cream	Octocrylene	4	1.16		23	Female	Black or African American	Not Hispanic or Latino	177.5	91.6	29.1	2.13	V
C.6	Cream	Octocrylene	6	0.8		23	Female	Black or African American	Not Hispanic or Latino	177.5	91.6	29.1	2.13	V
C.6	Cream	Octocrylene	8	2.13		23	Female	Black or African American	Not Hispanic or Latino	177.5	91.6	29.1	2.13	V
C.6	Cream	Octocrylene	9	1.88		23	Female	Black or African American	Not Hispanic or Latino	177.5	91.6	29.1	2.13	V
C.6	Cream	Octocrylene	10	3.9		23	Female	Black or African American	Not Hispanic or Latino	177.5	91.6	29.1	2.13	V
C.6	Cream	Octocrylene	12	2.18		23	Female	Black or African American	Not Hispanic or Latino	177.5	91.6	29.1	2.13	V
C.6	Cream	Octocrylene	14	1.29		23	Female	Black or African American	Not Hispanic or Latino	177.5	91.6	29.1	2.13	V
C.6	Cream	Octocrylene	23	1.57		23	Female	Black or African American	Not Hispanic or Latino	177.5	91.6	29.1	2.13	V
C.6	Cream	Octocrylene	28	1.83		23	Female	Black or African American	Not Hispanic or Latino	177.5	91.6	29.1	2.13	V
C.6	Cream	Octocrylene	33	5.37		23	Female	Black or African American	Not Hispanic or Latino	177.5	91.6	29.1	2.13	V
C.6	Cream	Octocrylene	47	2.32		23	Female	Black or African American	Not Hispanic or Latino	177.5	91.6	29.1	2.13	V
C.6	Cream	Octocrylene	144	1.44		23	Female	Black or African American	Not Hispanic or Latino	177.5	91.6	29.1	2.13	V
L.1	Lotion	Avobenzone	0	0	< 0.2	31	Female	White	Hispanic or Latino	144	46	22.2	1.36	III
L.1	Lotion	Avobenzone	0.5	0	< 0.2	31	Female	White	Hispanic or Latino	144	46	22.2	1.36	III
L.1	Lotion	Avobenzone	1	0	< 0.2	31	Female	White	Hispanic or Latino	144	46	22.2	1.36	III
L.1	Lotion	Avobenzone	1.5	0	< 0.2	31	Female	White	Hispanic or Latino	144	46	22.2	1.36	III
L.1	Lotion	Avobenzone	2	0	< 0.2	31	Female	White	Hispanic or Latino	144	46	22.2	1.36	III
L.1	Lotion	Avobenzone	4	0.22		31	Female	White	Hispanic or Latino	144	46	22.2	1.36	III
L.1	Lotion	Avobenzone	6	0.56		31	Female	White	Hispanic or Latino	144	46	22.2	1.36	III
L.1	Lotion	Avobenzone	8	1.49		31	Female	White	Hispanic or Latino	144	46	22.2	1.36	III
L.1	Lotion	Avobenzone	9	2.4		31	Female	White	Hispanic or Latino	144	46	22.2	1.36	III
L.1	Lotion	Avobenzone	10	1.82		31	Female	White	Hispanic or Latino	144	46	22.2	1.36	III
L.1	Lotion	Avobenzone	12	0.64		31	Female	White	Hispanic or Latino	144	46	22.2	1.36	III
L.1	Lotion	Avobenzone	14	1.5		31	Female	White	Hispanic or Latino	144	46	22.2	1.36	III
L.1	Lotion	Avobenzone	23	2.03		31	Female	White	Hispanic or Latino	144	46	22.2	1.36	III
L.1	Lotion	Avobenzone	28	1.94		31	Female	White	Hispanic or Latino	144	46	22.2	1.36	III
L.1	Lotion	Avobenzone	33	2.02		31	Female	White	Hispanic or Latino	144	46	22.2	1.36	III
L.1	Lotion	Avobenzone	47	2.55		31	Female	White	Hispanic or Latino	144	46	22.2	1.36	III
L.1	Lotion	Avobenzone	52	2.11		31	Female	White	Hispanic or Latino	144	46	22.2	1.36	III
L.1	Lotion	Avobenzone	57	2.69		31	Female	White	Hispanic or Latino	144	46	22.2	1.36	III
L.1	Lotion	Avobenzone	71	3.08		31	Female	White	Hispanic or Latino	144	46	22.2	1.36	III
L.1	Lotion	Avobenzone	73	1.34		31	Female	White	Hispanic or Latino	144	46	22.2	1.36	III
L.1	Lotion	Avobenzone	74	3.44		31	Female	White	Hispanic or Latino	144	46	22.2	1.36	III
L.1	Lotion	Avobenzone	76	1.45		31	Female	White	Hispanic or Latino	144	46	22.2	1.36	III
L.1	Lotion	Avobenzone	78	2.62		31	Female	White	Hispanic or Latino	144	46	22.2	1.36	III
L.1	Lotion	Avobenzone	81	2.75		31	Female	White	Hispanic or Latino	144	46	22.2	1.36	III
L.1	Lotion	Avobenzone	82	3.28		31	Female	White	Hispanic or Latino	144	46	22.2	1.36	III
L.1	Lotion	Avobenzone	84	2.34		31	Female	White	Hispanic or Latino	144	46	22.2	1.36	III
L.1	Lotion	Avobenzone	86	1.75		31	Female	White	Hispanic or Latino	144	46	22.2	1.36	III
L.1	Lotion	Avobenzone	95	3.64		31	Female	White	Hispanic or Latino	144	46	22.2	1.36	III
L.1	Lotion	Avobenzone	120	2.4		31	Female	White	Hispanic or Latino	144	46	22.2	1.36	III
L.1	Lotion	Avobenzone	144	1.56		31	Female	White	Hispanic or Latino	144	46	22.2	1.36	III
L.1	Lotion	Octocrylene	0	0	< 0.4	31	Female	White	Hispanic or Latino	144	46	22.2	1.36	III
L.1	Lotion	Octocrylene	0.5	0	< 0.4	31	Female	White	Hispanic or Latino	144	46	22.2	1.36	III
L.1	Lotion	Octocrylene	1	0	< 0.4	31	Female	White	Hispanic or Latino	144	46	22.2	1.36	III
L.1	Lotion	Octocrylene	1.5	0	< 0.4	31	Female	White	Hispanic or Latino	144	46	22.2	1.36	III
L.1	Lotion	Octocrylene	2	0	< 0.4	31	Female	White	Hispanic or Latino	144	46	22.2	1.36	III
L.1	Lotion	Octocrylene	4	0	< 0.4	31	Female	White	Hispanic or Latino	144	46	22.2	1.36	III
L.1	Lotion	Octocrylene	6	1.24		31	Female	White	Hispanic or Latino	144	46	22.2	1.36	III
L.1	Lotion	Octocrylene	8	1.36		31	Female	White	Hispanic or Latino	144	46	22.2	1.36	III
L.1	Lotion	Octocrylene	9	2.54		31	Female	White	Hispanic or Latino	144	46	22.2	1.36	III
L.1	Lotion	Octocrylene	10	2.36		31	Female	White	Hispanic or Latino	144	46	22.2	1.36	III
L.1	Lotion	Octocrylene	12	1.17		31	Female	White	Hispanic or Latino	144	46	22.2	1.36	III
L.1	Lotion	Octocrylene	14	2.58		31	Female	White	Hispanic or Latino	144	46	22.2	1.36	III
L.1	Lotion	Octocrylene	23	2.38		31	Female	White	Hispanic or Latino	144	46	22.2	1.36	III
L.1	Lotion	Octocrylene	28	2.32		31	Female	White	Hispanic or Latino	144	46	22.2	1.36	III
L.1	Lotion	Octocrylene	33	3.04		31	Female	White	Hispanic or Latino	144	46	22.2	1.36	III
L.1	Lotion	Octocrylene	47	2.89		31	Female	White	Hispanic or Latino	144	46	22.2	1.36	III
L.1	Lotion	Octocrylene	52	2.74		31	Female	White	Hispanic or Latino	144	46	22.2	1.36	III
L.1	Lotion	Octocrylene	57	3.23		31	Female	White	Hispanic or Latino	144	46	22.2	1.36	III
L.1	Lotion	Octocrylene	71	2.47		31	Female	White	Hispanic or Latino	144	46	22.2	1.36	III
L.1	Lotion	Octocrylene	73	2.48		31	Female	White	Hispanic or Latino	144	46	22.2	1.36	III
L.1	Lotion	Octocrylene	74	5.67		31	Female	White	Hispanic or Latino	144	46	22.2	1.36	III
L.1	Lotion	Octocrylene	76	2.48		31	Female	White	Hispanic or Latino	144	46	22.2	1.36	III
L.1	Lotion	Octocrylene	78	2.92		31	Female	White	Hispanic or Latino	144	46	22.2	1.36	III
L.1	Lotion	Octocrylene	81	4.27		31	Female	White	Hispanic or Latino	144	46	22.2	1.36	III
L.1	Lotion	Octocrylene	82	2.93		31	Female	White	Hispanic or Latino	144	46	22.2	1.36	III
L.1	Lotion	Octocrylene	84	2.94		31	Female	White	Hispanic or Latino	144	46	22.2	1.36	III
L.1	Lotion	Octocrylene	86	2.25		31	Female	White	Hispanic or Latino	144	46	22.2	1.36	III
L.1	Lotion	Octocrylene	95	3.32		31	Female	White	Hispanic or Latino	144	46	22.2	1.36	III
L.1	Lotion	Octocrylene	120	3.07		31	Female	White	Hispanic or Latino	144	46	22.2	1.36	III
L.1	Lotion	Octocrylene	144	1.6		31	Female	White	Hispanic or Latino	144	46	22.2	1.36	III
L.1	Lotion	Oxybenzone	0	0	< 0.4	31	Female	White	Hispanic or Latino	144	46	22.2	1.36	III
L.1	Lotion	Oxybenzone	0.5	3.72		31	Female	White	Hispanic or Latino	144	46	22.2	1.36	III
L.1	Lotion	Oxybenzone	1	9.98		31	Female	White	Hispanic or Latino	144	46	22.2	1.36	III
L.1	Lotion	Oxybenzone	1.5	18.01		31	Female	White	Hispanic or Latino	144	46	22.2	1.36	III
L.1	Lotion	Oxybenzone	2	32.59		31	Female	White	Hispanic or Latino	144	46	22.2	1.36	III
L.1	Lotion	Oxybenzone	4	36.8		31	Female	White	Hispanic or Latino	144	46	22.2	1.36	III
L.1	Lotion	Oxybenzone	6	66.9		31	Female	White	Hispanic or Latino	144	46	22.2	1.36	III
L.1	Lotion	Oxybenzone	8	142.9		31	Female	White	Hispanic or Latino	144	46	22.2	1.36	III
L.1	Lotion	Oxybenzone	9	81.79		31	Female	White	Hispanic or Latino	144	46	22.2	1.36	III
L.1	Lotion	Oxybenzone	10	112.68		31	Female	White	Hispanic or Latino	144	46	22.2	1.36	III
L.1	Lotion	Oxybenzone	12	48.08		31	Female	White	Hispanic or Latino	144	46	22.2	1.36	III
L.1	Lotion	Oxybenzone	14	57.9		31	Female	White	Hispanic or Latino	144	46	22.2	1.36	III
L.1	Lotion	Oxybenzone	23	45.63		31	Female	White	Hispanic or Latino	144	46	22.2	1.36	III
L.1	Lotion	Oxybenzone	28	101.58		31	Female	White	Hispanic or Latino	144	46	22.2	1.36	III
L.1	Lotion	Oxybenzone	33	86.87		31	Female	White	Hispanic or Latino	144	46	22.2	1.36	III
L.1	Lotion	Oxybenzone	47	50.95		31	Female	White	Hispanic or Latino	144	46	22.2	1.36	III
L.1	Lotion	Oxybenzone	52	77.1		31	Female	White	Hispanic or Latino	144	46	22.2	1.36	III
L.1	Lotion	Oxybenzone	57	93.17		31	Female	White	Hispanic or Latino	144	46	22.2	1.36	III
L.1	Lotion	Oxybenzone	71	53.97		31	Female	White	Hispanic or Latino	144	46	22.2	1.36	III
L.1	Lotion	Oxybenzone	73	42.77		31	Female	White	Hispanic or Latino	144	46	22.2	1.36	III
L.1	Lotion	Oxybenzone	74	124.83		31	Female	White	Hispanic or Latino	144	46	22.2	1.36	III
L.1	Lotion	Oxybenzone	76	53.02		31	Female	White	Hispanic or Latino	144	46	22.2	1.36	III
L.1	Lotion	Oxybenzone	78	72.38		31	Female	White	Hispanic or Latino	144	46	22.2	1.36	III
L.1	Lotion	Oxybenzone	81	61.28		31	Female	White	Hispanic or Latino	144	46	22.2	1.36	III
L.1	Lotion	Oxybenzone	82	83.19		31	Female	White	Hispanic or Latino	144	46	22.2	1.36	III
L.1	Lotion	Oxybenzone	84	76.44		31	Female	White	Hispanic or Latino	144	46	22.2	1.36	III
L.1	Lotion	Oxybenzone	86	94.09		31	Female	White	Hispanic or Latino	144	46	22.2	1.36	III
L.1	Lotion	Oxybenzone	95	99.01		31	Female	White	Hispanic or Latino	144	46	22.2	1.36	III
L.1	Lotion	Oxybenzone	120	22.9		31	Female	White	Hispanic or Latino	144	46	22.2	1.36	III
L.1	Lotion	Oxybenzone	144	17.66		31	Female	White	Hispanic or Latino	144	46	22.2	1.36	III
L.2	Lotion	Avobenzone	0	0	< 0.2	29	Female	Black or African American	Not Hispanic or Latino	154.5	63.6	26.6	1.65	IV
L.2	Lotion	Avobenzone	0.5	0	< 0.2	29	Female	Black or African American	Not Hispanic or Latino	154.5	63.6	26.6	1.65	IV
L.2	Lotion	Avobenzone	1	0	< 0.2	29	Female	Black or African American	Not Hispanic or Latino	154.5	63.6	26.6	1.65	IV
L.2	Lotion	Avobenzone	1.5	0	< 0.2	29	Female	Black or African American	Not Hispanic or Latino	154.5	63.6	26.6	1.65	IV
L.2	Lotion	Avobenzone	2	0	< 0.2	29	Female	Black or African American	Not Hispanic or Latino	154.5	63.6	26.6	1.65	IV
L.2	Lotion	Avobenzone	4	0.53		29	Female	Black or African American	Not Hispanic or Latino	154.5	63.6	26.6	1.65	IV
L.2	Lotion	Avobenzone	6	1.16		29	Female	Black or African American	Not Hispanic or Latino	154.5	63.6	26.6	1.65	IV
L.2	Lotion	Avobenzone	8	2.23		29	Female	Black or African American	Not Hispanic or Latino	154.5	63.6	26.6	1.65	IV
L.2	Lotion	Avobenzone	9	1.48		29	Female	Black or African American	Not Hispanic or Latino	154.5	63.6	26.6	1.65	IV
L.2	Lotion	Avobenzone	10	1.07		29	Female	Black or African American	Not Hispanic or Latino	154.5	63.6	26.6	1.65	IV
L.2	Lotion	Avobenzone	12	2.33		29	Female	Black or African American	Not Hispanic or Latino	154.5	63.6	26.6	1.65	IV
L.2	Lotion	Avobenzone	14	1.18		29	Female	Black or African American	Not Hispanic or Latino	154.5	63.6	26.6	1.65	IV
L.2	Lotion	Avobenzone	23	0.63		29	Female	Black or African American	Not Hispanic or Latino	154.5	63.6	26.6	1.65	IV
L.2	Lotion	Avobenzone	28	1.37		29	Female	Black or African American	Not Hispanic or Latino	154.5	63.6	26.6	1.65	IV
L.2	Lotion	Avobenzone	33	3.86		29	Female	Black or African American	Not Hispanic or Latino	154.5	63.6	26.6	1.65	IV
L.2	Lotion	Avobenzone	47	1.31		29	Female	Black or African American	Not Hispanic or Latino	154.5	63.6	26.6	1.65	IV
L.2	Lotion	Avobenzone	52	1.69		29	Female	Black or African American	Not Hispanic or Latino	154.5	63.6	26.6	1.65	IV
L.2	Lotion	Avobenzone	57	2.96		29	Female	Black or African American	Not Hispanic or Latino	154.5	63.6	26.6	1.65	IV
L.2	Lotion	Avobenzone	71	1.43		29	Female	Black or African American	Not Hispanic or Latino	154.5	63.6	26.6	1.65	IV
L.2	Lotion	Avobenzone	73	1.72		29	Female	Black or African American	Not Hispanic or Latino	154.5	63.6	26.6	1.65	IV
L.2	Lotion	Avobenzone	74	1.87		29	Female	Black or African American	Not Hispanic or Latino	154.5	63.6	26.6	1.65	IV
L.2	Lotion	Avobenzone	76	1.87		29	Female	Black or African American	Not Hispanic or Latino	154.5	63.6	26.6	1.65	IV
L.2	Lotion	Avobenzone	78	1.94		29	Female	Black or African American	Not Hispanic or Latino	154.5	63.6	26.6	1.65	IV
L.2	Lotion	Avobenzone	81	2.42		29	Female	Black or African American	Not Hispanic or Latino	154.5	63.6	26.6	1.65	IV
L.2	Lotion	Avobenzone	82	2.35		29	Female	Black or African American	Not Hispanic or Latino	154.5	63.6	26.6	1.65	IV
L.2	Lotion	Avobenzone	84	1.88		29	Female	Black or African American	Not Hispanic or Latino	154.5	63.6	26.6	1.65	IV
L.2	Lotion	Avobenzone	86	1.78		29	Female	Black or African American	Not Hispanic or Latino	154.5	63.6	26.6	1.65	IV
L.2	Lotion	Avobenzone	95	1.89		29	Female	Black or African American	Not Hispanic or Latino	154.5	63.6	26.6	1.65	IV
L.2	Lotion	Avobenzone	120	1.01		29	Female	Black or African American	Not Hispanic or Latino	154.5	63.6	26.6	1.65	IV
L.2	Lotion	Avobenzone	144	0.64		29	Female	Black or African American	Not Hispanic or Latino	154.5	63.6	26.6	1.65	IV
L.2	Lotion	Octocrylene	0	0	< 0.4	29	Female	Black or African American	Not Hispanic or Latino	154.5	63.6	26.6	1.65	IV
L.2	Lotion	Octocrylene	0.5	0	< 0.4	29	Female	Black or African American	Not Hispanic or Latino	154.5	63.6	26.6	1.65	IV
L.2	Lotion	Octocrylene	1	0	< 0.4	29	Female	Black or African American	Not Hispanic or Latino	154.5	63.6	26.6	1.65	IV
L.2	Lotion	Octocrylene	1.5	0	< 0.4	29	Female	Black or African American	Not Hispanic or Latino	154.5	63.6	26.6	1.65	IV
L.2	Lotion	Octocrylene	2	0	< 0.4	29	Female	Black or African American	Not Hispanic or Latino	154.5	63.6	26.6	1.65	IV
L.2	Lotion	Octocrylene	4	0.4		29	Female	Black or African American	Not Hispanic or Latino	154.5	63.6	26.6	1.65	IV
L.2	Lotion	Octocrylene	6	0.92		29	Female	Black or African American	Not Hispanic or Latino	154.5	63.6	26.6	1.65	IV
L.2	Lotion	Octocrylene	8	2.08		29	Female	Black or African American	Not Hispanic or Latino	154.5	63.6	26.6	1.65	IV
L.2	Lotion	Octocrylene	9	1.3		29	Female	Black or African American	Not Hispanic or Latino	154.5	63.6	26.6	1.65	IV
L.2	Lotion	Octocrylene	10	0.77		29	Female	Black or African American	Not Hispanic or Latino	154.5	63.6	26.6	1.65	IV
L.2	Lotion	Octocrylene	12	1.75		29	Female	Black or African American	Not Hispanic or Latino	154.5	63.6	26.6	1.65	IV
L.2	Lotion	Octocrylene	14	0.85		29	Female	Black or African American	Not Hispanic or Latino	154.5	63.6	26.6	1.65	IV
L.2	Lotion	Octocrylene	23	0.57		29	Female	Black or African American	Not Hispanic or Latino	154.5	63.6	26.6	1.65	IV
L.2	Lotion	Octocrylene	28	1.21		29	Female	Black or African American	Not Hispanic or Latino	154.5	63.6	26.6	1.65	IV
L.2	Lotion	Octocrylene	33	2.76		29	Female	Black or African American	Not Hispanic or Latino	154.5	63.6	26.6	1.65	IV
L.2	Lotion	Octocrylene	47	1.05		29	Female	Black or African American	Not Hispanic or Latino	154.5	63.6	26.6	1.65	IV
L.2	Lotion	Octocrylene	52	1.29		29	Female	Black or African American	Not Hispanic or Latino	154.5	63.6	26.6	1.65	IV
L.2	Lotion	Octocrylene	57	2.14		29	Female	Black or African American	Not Hispanic or Latino	154.5	63.6	26.6	1.65	IV
L.2	Lotion	Octocrylene	71	1.15		29	Female	Black or African American	Not Hispanic or Latino	154.5	63.6	26.6	1.65	IV
L.2	Lotion	Octocrylene	73	1.04		29	Female	Black or African American	Not Hispanic or Latino	154.5	63.6	26.6	1.65	IV
L.2	Lotion	Octocrylene	74	1.44		29	Female	Black or African American	Not Hispanic or Latino	154.5	63.6	26.6	1.65	IV
L.2	Lotion	Octocrylene	76	1.43		29	Female	Black or African American	Not Hispanic or Latino	154.5	63.6	26.6	1.65	IV
L.2	Lotion	Octocrylene	78	1.44		29	Female	Black or African American	Not Hispanic or Latino	154.5	63.6	26.6	1.65	IV
L.2	Lotion	Octocrylene	81	1.71		29	Female	Black or African American	Not Hispanic or Latino	154.5	63.6	26.6	1.65	IV
L.2	Lotion	Octocrylene	82	1.64		29	Female	Black or African American	Not Hispanic or Latino	154.5	63.6	26.6	1.65	IV
L.2	Lotion	Octocrylene	84	1.36		29	Female	Black or African American	Not Hispanic or Latino	154.5	63.6	26.6	1.65	IV
L.2	Lotion	Octocrylene	86	1.22		29	Female	Black or African American	Not Hispanic or Latino	154.5	63.6	26.6	1.65	IV
L.2	Lotion	Octocrylene	95	1.42		29	Female	Black or African American	Not Hispanic or Latino	154.5	63.6	26.6	1.65	IV
L.2	Lotion	Octocrylene	120	0.61		29	Female	Black or African American	Not Hispanic or Latino	154.5	63.6	26.6	1.65	IV
L.2	Lotion	Octocrylene	144	0.53		29	Female	Black or African American	Not Hispanic or Latino	154.5	63.6	26.6	1.65	IV
L.2	Lotion	Oxybenzone	0	0	< 0.4	29	Female	Black or African American	Not Hispanic or Latino	154.5	63.6	26.6	1.65	IV
L.2	Lotion	Oxybenzone	0.5	5.02		29	Female	Black or African American	Not Hispanic or Latino	154.5	63.6	26.6	1.65	IV
L.2	Lotion	Oxybenzone	1	14.54		29	Female	Black or African American	Not Hispanic or Latino	154.5	63.6	26.6	1.65	IV
L.2	Lotion	Oxybenzone	1.5	25.08		29	Female	Black or African American	Not Hispanic or Latino	154.5	63.6	26.6	1.65	IV
L.2	Lotion	Oxybenzone	2	25.64		29	Female	Black or African American	Not Hispanic or Latino	154.5	63.6	26.6	1.65	IV
L.2	Lotion	Oxybenzone	4	96.97		29	Female	Black or African American	Not Hispanic or Latino	154.5	63.6	26.6	1.65	IV
L.2	Lotion	Oxybenzone	6	67.16		29	Female	Black or African American	Not Hispanic or Latino	154.5	63.6	26.6	1.65	IV
L.2	Lotion	Oxybenzone	8	94.24		29	Female	Black or African American	Not Hispanic or Latino	154.5	63.6	26.6	1.65	IV
L.2	Lotion	Oxybenzone	9	96.05		29	Female	Black or African American	Not Hispanic or Latino	154.5	63.6	26.6	1.65	IV
L.2	Lotion	Oxybenzone	10	51.13		29	Female	Black or African American	Not Hispanic or Latino	154.5	63.6	26.6	1.65	IV
L.2	Lotion	Oxybenzone	12	61.77		29	Female	Black or African American	Not Hispanic or Latino	154.5	63.6	26.6	1.65	IV
L.2	Lotion	Oxybenzone	14	63.46		29	Female	Black or African American	Not Hispanic or Latino	154.5	63.6	26.6	1.65	IV
L.2	Lotion	Oxybenzone	23	58.17		29	Female	Black or African American	Not Hispanic or Latino	154.5	63.6	26.6	1.65	IV
L.2	Lotion	Oxybenzone	28	80.35		29	Female	Black or African American	Not Hispanic or Latino	154.5	63.6	26.6	1.65	IV
L.2	Lotion	Oxybenzone	33	72.46		29	Female	Black or African American	Not Hispanic or Latino	154.5	63.6	26.6	1.65	IV
L.2	Lotion	Oxybenzone	47	81.92		29	Female	Black or African American	Not Hispanic or Latino	154.5	63.6	26.6	1.65	IV
L.2	Lotion	Oxybenzone	52	70.04		29	Female	Black or African American	Not Hispanic or Latino	154.5	63.6	26.6	1.65	IV
L.2	Lotion	Oxybenzone	57	103.33		29	Female	Black or African American	Not Hispanic or Latino	154.5	63.6	26.6	1.65	IV
L.2	Lotion	Oxybenzone	71	45.91		29	Female	Black or African American	Not Hispanic or Latino	154.5	63.6	26.6	1.65	IV
L.2	Lotion	Oxybenzone	73	102.55		29	Female	Black or African American	Not Hispanic or Latino	154.5	63.6	26.6	1.65	IV
L.2	Lotion	Oxybenzone	74	102.38		29	Female	Black or African American	Not Hispanic or Latino	154.5	63.6	26.6	1.65	IV
L.2	Lotion	Oxybenzone	76	89.88		29	Female	Black or African American	Not Hispanic or Latino	154.5	63.6	26.6	1.65	IV
L.2	Lotion	Oxybenzone	78	89.4		29	Female	Black or African American	Not Hispanic or Latino	154.5	63.6	26.6	1.65	IV
L.2	Lotion	Oxybenzone	81	73.4		29	Female	Black or African American	Not Hispanic or Latino	154.5	63.6	26.6	1.65	IV
L.2	Lotion	Oxybenzone	82	62.83		29	Female	Black or African American	Not Hispanic or Latino	154.5	63.6	26.6	1.65	IV
L.2	Lotion	Oxybenzone	84	75.32		29	Female	Black or African American	Not Hispanic or Latino	154.5	63.6	26.6	1.65	IV
L.2	Lotion	Oxybenzone	86	77.07		29	Female	Black or African American	Not Hispanic or Latino	154.5	63.6	26.6	1.65	IV
L.2	Lotion	Oxybenzone	95	87.17		29	Female	Black or African American	Not Hispanic or Latino	154.5	63.6	26.6	1.65	IV
L.2	Lotion	Oxybenzone	120	21.36		29	Female	Black or African American	Not Hispanic or Latino	154.5	63.6	26.6	1.65	IV
L.2	Lotion	Oxybenzone	144	14.62		29	Female	Black or African American	Not Hispanic or Latino	154.5	63.6	26.6	1.65	IV
L.3	Lotion	Avobenzone	0	0	< 0.2	46	Male	White	Not Hispanic or Latino	172	70.4	23.8	1.83	IV
L.3	Lotion	Avobenzone	0.5	0	< 0.2	46	Male	White	Not Hispanic or Latino	172	70.4	23.8	1.83	IV
L.3	Lotion	Avobenzone	1	0	< 0.2	46	Male	White	Not Hispanic or Latino	172	70.4	23.8	1.83	IV
L.3	Lotion	Avobenzone	1.5	0	< 0.2	46	Male	White	Not Hispanic or Latino	172	70.4	23.8	1.83	IV
L.3	Lotion	Avobenzone	2	0	< 0.2	46	Male	White	Not Hispanic or Latino	172	70.4	23.8	1.83	IV
L.3	Lotion	Avobenzone	4	0.92		46	Male	White	Not Hispanic or Latino	172	70.4	23.8	1.83	IV
L.3	Lotion	Avobenzone	6	1.87		46	Male	White	Not Hispanic or Latino	172	70.4	23.8	1.83	IV
L.3	Lotion	Avobenzone	8	2.45		46	Male	White	Not Hispanic or Latino	172	70.4	23.8	1.83	IV
L.3	Lotion	Avobenzone	9	1.54		46	Male	White	Not Hispanic or Latino	172	70.4	23.8	1.83	IV
L.3	Lotion	Avobenzone	10	2.24		46	Male	White	Not Hispanic or Latino	172	70.4	23.8	1.83	IV
L.3	Lotion	Avobenzone	12	2.13		46	Male	White	Not Hispanic or Latino	172	70.4	23.8	1.83	IV
L.3	Lotion	Avobenzone	14	2.73		46	Male	White	Not Hispanic or Latino	172	70.4	23.8	1.83	IV
L.3	Lotion	Avobenzone	23	5.15		46	Male	White	Not Hispanic or Latino	172	70.4	23.8	1.83	IV
L.3	Lotion	Avobenzone	28	4.17		46	Male	White	Not Hispanic or Latino	172	70.4	23.8	1.83	IV
L.3	Lotion	Avobenzone	33	6.32		46	Male	White	Not Hispanic or Latino	172	70.4	23.8	1.83	IV
L.3	Lotion	Avobenzone	47	5.94		46	Male	White	Not Hispanic or Latino	172	70.4	23.8	1.83	IV
L.3	Lotion	Avobenzone	52	6.09		46	Male	White	Not Hispanic or Latino	172	70.4	23.8	1.83	IV
L.3	Lotion	Avobenzone	57	6.08		46	Male	White	Not Hispanic or Latino	172	70.4	23.8	1.83	IV
L.3	Lotion	Avobenzone	71	8.01		46	Male	White	Not Hispanic or Latino	172	70.4	23.8	1.83	IV
L.3	Lotion	Avobenzone	73	7.93		46	Male	White	Not Hispanic or Latino	172	70.4	23.8	1.83	IV
L.3	Lotion	Avobenzone	74	8.59		46	Male	White	Not Hispanic or Latino	172	70.4	23.8	1.83	IV
L.3	Lotion	Avobenzone	76	5.48		46	Male	White	Not Hispanic or Latino	172	70.4	23.8	1.83	IV
L.3	Lotion	Avobenzone	78	5.7		46	Male	White	Not Hispanic or Latino	172	70.4	23.8	1.83	IV
L.3	Lotion	Avobenzone	81	4.9		46	Male	White	Not Hispanic or Latino	172	70.4	23.8	1.83	IV
L.3	Lotion	Avobenzone	82	6.63		46	Male	White	Not Hispanic or Latino	172	70.4	23.8	1.83	IV
L.3	Lotion	Avobenzone	84	9.29		46	Male	White	Not Hispanic or Latino	172	70.4	23.8	1.83	IV
L.3	Lotion	Avobenzone	86	8.87		46	Male	White	Not Hispanic or Latino	172	70.4	23.8	1.83	IV
L.3	Lotion	Avobenzone	95	6.45		46	Male	White	Not Hispanic or Latino	172	70.4	23.8	1.83	IV
L.3	Lotion	Avobenzone	120	3.48		46	Male	White	Not Hispanic or Latino	172	70.4	23.8	1.83	IV
L.3	Lotion	Avobenzone	144	3.36		46	Male	White	Not Hispanic or Latino	172	70.4	23.8	1.83	IV
L.3	Lotion	Octocrylene	0	0	< 0.4	46	Male	White	Not Hispanic or Latino	172	70.4	23.8	1.83	IV
L.3	Lotion	Octocrylene	0.5	0	< 0.4	46	Male	White	Not Hispanic or Latino	172	70.4	23.8	1.83	IV
L.3	Lotion	Octocrylene	1	0	< 0.4	46	Male	White	Not Hispanic or Latino	172	70.4	23.8	1.83	IV
L.3	Lotion	Octocrylene	1.5	0	< 0.4	46	Male	White	Not Hispanic or Latino	172	70.4	23.8	1.83	IV
L.3	Lotion	Octocrylene	2	0	< 0.4	46	Male	White	Not Hispanic or Latino	172	70.4	23.8	1.83	IV
L.3	Lotion	Octocrylene	4	1.08		46	Male	White	Not Hispanic or Latino	172	70.4	23.8	1.83	IV
L.3	Lotion	Octocrylene	6	2.16		46	Male	White	Not Hispanic or Latino	172	70.4	23.8	1.83	IV
L.3	Lotion	Octocrylene	8	4.64		46	Male	White	Not Hispanic or Latino	172	70.4	23.8	1.83	IV
L.3	Lotion	Octocrylene	9	3.48		46	Male	White	Not Hispanic or Latino	172	70.4	23.8	1.83	IV
L.3	Lotion	Octocrylene	10	3.47		46	Male	White	Not Hispanic or Latino	172	70.4	23.8	1.83	IV
L.3	Lotion	Octocrylene	12	3.98		46	Male	White	Not Hispanic or Latino	172	70.4	23.8	1.83	IV
L.3	Lotion	Octocrylene	14	4.67		46	Male	White	Not Hispanic or Latino	172	70.4	23.8	1.83	IV
L.3	Lotion	Octocrylene	23	6.28		46	Male	White	Not Hispanic or Latino	172	70.4	23.8	1.83	IV
L.3	Lotion	Octocrylene	28	6.46		46	Male	White	Not Hispanic or Latino	172	70.4	23.8	1.83	IV
L.3	Lotion	Octocrylene	33	7.76		46	Male	White	Not Hispanic or Latino	172	70.4	23.8	1.83	IV
L.3	Lotion	Octocrylene	47	9.04		46	Male	White	Not Hispanic or Latino	172	70.4	23.8	1.83	IV
L.3	Lotion	Octocrylene	52	6.76		46	Male	White	Not Hispanic or Latino	172	70.4	23.8	1.83	IV
L.3	Lotion	Octocrylene	57	9.99		46	Male	White	Not Hispanic or Latino	172	70.4	23.8	1.83	IV
L.3	Lotion	Octocrylene	71	9.76		46	Male	White	Not Hispanic or Latino	172	70.4	23.8	1.83	IV
L.3	Lotion	Octocrylene	73	7.49		46	Male	White	Not Hispanic or Latino	172	70.4	23.8	1.83	IV
L.3	Lotion	Octocrylene	74	8.37		46	Male	White	Not Hispanic or Latino	172	70.4	23.8	1.83	IV
L.3	Lotion	Octocrylene	76	7.12		46	Male	White	Not Hispanic or Latino	172	70.4	23.8	1.83	IV
L.3	Lotion	Octocrylene	78	8.58		46	Male	White	Not Hispanic or Latino	172	70.4	23.8	1.83	IV
L.3	Lotion	Octocrylene	81	8.39		46	Male	White	Not Hispanic or Latino	172	70.4	23.8	1.83	IV
L.3	Lotion	Octocrylene	82	8.01		46	Male	White	Not Hispanic or Latino	172	70.4	23.8	1.83	IV
L.3	Lotion	Octocrylene	84	8.44		46	Male	White	Not Hispanic or Latino	172	70.4	23.8	1.83	IV
L.3	Lotion	Octocrylene	86	9.25		46	Male	White	Not Hispanic or Latino	172	70.4	23.8	1.83	IV
L.3	Lotion	Octocrylene	95	6.34		46	Male	White	Not Hispanic or Latino	172	70.4	23.8	1.83	IV
L.3	Lotion	Octocrylene	120	4.15		46	Male	White	Not Hispanic or Latino	172	70.4	23.8	1.83	IV
L.3	Lotion	Octocrylene	144	4.38		46	Male	White	Not Hispanic or Latino	172	70.4	23.8	1.83	IV
L.3	Lotion	Oxybenzone	0	0	< 0.4	46	Male	White	Not Hispanic or Latino	172	70.4	23.8	1.83	IV
L.3	Lotion	Oxybenzone	0.5	41.53		46	Male	White	Not Hispanic or Latino	172	70.4	23.8	1.83	IV
L.3	Lotion	Oxybenzone	1	49.41		46	Male	White	Not Hispanic or Latino	172	70.4	23.8	1.83	IV
L.3	Lotion	Oxybenzone	1.5	54.14		46	Male	White	Not Hispanic or Latino	172	70.4	23.8	1.83	IV
L.3	Lotion	Oxybenzone	2	112.84		46	Male	White	Not Hispanic or Latino	172	70.4	23.8	1.83	IV
L.3	Lotion	Oxybenzone	4	99.05		46	Male	White	Not Hispanic or Latino	172	70.4	23.8	1.83	IV
L.3	Lotion	Oxybenzone	6	137.53		46	Male	White	Not Hispanic or Latino	172	70.4	23.8	1.83	IV
L.3	Lotion	Oxybenzone	8	94.94		46	Male	White	Not Hispanic or Latino	172	70.4	23.8	1.83	IV
L.3	Lotion	Oxybenzone	9	68.9		46	Male	White	Not Hispanic or Latino	172	70.4	23.8	1.83	IV
L.3	Lotion	Oxybenzone	10	110.91		46	Male	White	Not Hispanic or Latino	172	70.4	23.8	1.83	IV
L.3	Lotion	Oxybenzone	12	61.35		46	Male	White	Not Hispanic or Latino	172	70.4	23.8	1.83	IV
L.3	Lotion	Oxybenzone	14	72.19		46	Male	White	Not Hispanic or Latino	172	70.4	23.8	1.83	IV
L.3	Lotion	Oxybenzone	23	77.21		46	Male	White	Not Hispanic or Latino	172	70.4	23.8	1.83	IV
L.3	Lotion	Oxybenzone	28	140.16		46	Male	White	Not Hispanic or Latino	172	70.4	23.8	1.83	IV
L.3	Lotion	Oxybenzone	33	110.43		46	Male	White	Not Hispanic or Latino	172	70.4	23.8	1.83	IV
L.3	Lotion	Oxybenzone	47	117.57		46	Male	White	Not Hispanic or Latino	172	70.4	23.8	1.83	IV
L.3	Lotion	Oxybenzone	52	135.95		46	Male	White	Not Hispanic or Latino	172	70.4	23.8	1.83	IV
L.3	Lotion	Oxybenzone	57	190.26		46	Male	White	Not Hispanic or Latino	172	70.4	23.8	1.83	IV
L.3	Lotion	Oxybenzone	71	112.59		46	Male	White	Not Hispanic or Latino	172	70.4	23.8	1.83	IV
L.3	Lotion	Oxybenzone	73	134.59		46	Male	White	Not Hispanic or Latino	172	70.4	23.8	1.83	IV
L.3	Lotion	Oxybenzone	74	181.04		46	Male	White	Not Hispanic or Latino	172	70.4	23.8	1.83	IV
L.3	Lotion	Oxybenzone	76	117.23		46	Male	White	Not Hispanic or Latino	172	70.4	23.8	1.83	IV
L.3	Lotion	Oxybenzone	78	123.01		46	Male	White	Not Hispanic or Latino	172	70.4	23.8	1.83	IV
L.3	Lotion	Oxybenzone	81	163.43		46	Male	White	Not Hispanic or Latino	172	70.4	23.8	1.83	IV
L.3	Lotion	Oxybenzone	82	150.34		46	Male	White	Not Hispanic or Latino	172	70.4	23.8	1.83	IV
L.3	Lotion	Oxybenzone	84	152.91		46	Male	White	Not Hispanic or Latino	172	70.4	23.8	1.83	IV
L.3	Lotion	Oxybenzone	86	127.98		46	Male	White	Not Hispanic or Latino	172	70.4	23.8	1.83	IV
L.3	Lotion	Oxybenzone	95	91.31		46	Male	White	Not Hispanic or Latino	172	70.4	23.8	1.83	IV
L.3	Lotion	Oxybenzone	120	29.88		46	Male	White	Not Hispanic or Latino	172	70.4	23.8	1.83	IV
L.3	Lotion	Oxybenzone	144	32.17		46	Male	White	Not Hispanic or Latino	172	70.4	23.8	1.83	IV
L.4	Lotion	Avobenzone	0	0	< 0.2	30	Male	Black or African American	Not Hispanic or Latino	180.5	78.6	24.1	1.99	V
L.4	Lotion	Avobenzone	0.5	0	< 0.2	30	Male	Black or African American	Not Hispanic or Latino	180.5	78.6	24.1	1.99	V
L.4	Lotion	Avobenzone	1	0	< 0.2	30	Male	Black or African American	Not Hispanic or Latino	180.5	78.6	24.1	1.99	V
L.4	Lotion	Avobenzone	1.5	0	< 0.2	30	Male	Black or African American	Not Hispanic or Latino	180.5	78.6	24.1	1.99	V
L.4	Lotion	Avobenzone	2	0.79		30	Male	Black or African American	Not Hispanic or Latino	180.5	78.6	24.1	1.99	V
L.4	Lotion	Avobenzone	4	0.47		30	Male	Black or African American	Not Hispanic or Latino	180.5	78.6	24.1	1.99	V
L.4	Lotion	Avobenzone	6	1.55		30	Male	Black or African American	Not Hispanic or Latino	180.5	78.6	24.1	1.99	V
L.4	Lotion	Avobenzone	8	1.87		30	Male	Black or African American	Not Hispanic or Latino	180.5	78.6	24.1	1.99	V
L.4	Lotion	Avobenzone	9	4.43		30	Male	Black or African American	Not Hispanic or Latino	180.5	78.6	24.1	1.99	V
L.4	Lotion	Avobenzone	10	3.35		30	Male	Black or African American	Not Hispanic or Latino	180.5	78.6	24.1	1.99	V
L.4	Lotion	Avobenzone	12	4.14		30	Male	Black or African American	Not Hispanic or Latino	180.5	78.6	24.1	1.99	V
L.4	Lotion	Avobenzone	14	3.52		30	Male	Black or African American	Not Hispanic or Latino	180.5	78.6	24.1	1.99	V
L.4	Lotion	Avobenzone	23	0.93		30	Male	Black or African American	Not Hispanic or Latino	180.5	78.6	24.1	1.99	V
L.4	Lotion	Avobenzone	28	1.33		30	Male	Black or African American	Not Hispanic or Latino	180.5	78.6	24.1	1.99	V
L.4	Lotion	Avobenzone	33	4.33		30	Male	Black or African American	Not Hispanic or Latino	180.5	78.6	24.1	1.99	V
L.4	Lotion	Avobenzone	47	1.33		30	Male	Black or African American	Not Hispanic or Latino	180.5	78.6	24.1	1.99	V
L.4	Lotion	Avobenzone	52	4.97		30	Male	Black or African American	Not Hispanic or Latino	180.5	78.6	24.1	1.99	V
L.4	Lotion	Avobenzone	57	5.62		30	Male	Black or African American	Not Hispanic or Latino	180.5	78.6	24.1	1.99	V
L.4	Lotion	Avobenzone	71	2.1		30	Male	Black or African American	Not Hispanic or Latino	180.5	78.6	24.1	1.99	V
L.4	Lotion	Avobenzone	73	2.01		30	Male	Black or African American	Not Hispanic or Latino	180.5	78.6	24.1	1.99	V
L.4	Lotion	Avobenzone	74	1.47		30	Male	Black or African American	Not Hispanic or Latino	180.5	78.6	24.1	1.99	V
L.4	Lotion	Avobenzone	76	2.43		30	Male	Black or African American	Not Hispanic or Latino	180.5	78.6	24.1	1.99	V
L.4	Lotion	Avobenzone	78	4.11		30	Male	Black or African American	Not Hispanic or Latino	180.5	78.6	24.1	1.99	V
L.4	Lotion	Avobenzone	81	3.04		30	Male	Black or African American	Not Hispanic or Latino	180.5	78.6	24.1	1.99	V
L.4	Lotion	Avobenzone	82	1.85		30	Male	Black or African American	Not Hispanic or Latino	180.5	78.6	24.1	1.99	V
L.4	Lotion	Avobenzone	84	1.72		30	Male	Black or African American	Not Hispanic or Latino	180.5	78.6	24.1	1.99	V
L.4	Lotion	Avobenzone	86	1.95		30	Male	Black or African American	Not Hispanic or Latino	180.5	78.6	24.1	1.99	V
L.4	Lotion	Avobenzone	95	0.99		30	Male	Black or African American	Not Hispanic or Latino	180.5	78.6	24.1	1.99	V
L.4	Lotion	Avobenzone	120	0.84		30	Male	Black or African American	Not Hispanic or Latino	180.5	78.6	24.1	1.99	V
L.4	Lotion	Avobenzone	144	1.2		30	Male	Black or African American	Not Hispanic or Latino	180.5	78.6	24.1	1.99	V
L.4	Lotion	Octocrylene	0	0	< 0.4	30	Male	Black or African American	Not Hispanic or Latino	180.5	78.6	24.1	1.99	V
L.4	Lotion	Octocrylene	0.5	0	< 0.4	30	Male	Black or African American	Not Hispanic or Latino	180.5	78.6	24.1	1.99	V
L.4	Lotion	Octocrylene	1	0	< 0.4	30	Male	Black or African American	Not Hispanic or Latino	180.5	78.6	24.1	1.99	V
L.4	Lotion	Octocrylene	1.5	0	< 0.4	30	Male	Black or African American	Not Hispanic or Latino	180.5	78.6	24.1	1.99	V
L.4	Lotion	Octocrylene	2	0	< 0.4	30	Male	Black or African American	Not Hispanic or Latino	180.5	78.6	24.1	1.99	V
L.4	Lotion	Octocrylene	4	0.4		30	Male	Black or African American	Not Hispanic or Latino	180.5	78.6	24.1	1.99	V
L.4	Lotion	Octocrylene	6	1.41		30	Male	Black or African American	Not Hispanic or Latino	180.5	78.6	24.1	1.99	V
L.4	Lotion	Octocrylene	8	2.35		30	Male	Black or African American	Not Hispanic or Latino	180.5	78.6	24.1	1.99	V
L.4	Lotion	Octocrylene	9	4.16		30	Male	Black or African American	Not Hispanic or Latino	180.5	78.6	24.1	1.99	V
L.4	Lotion	Octocrylene	10	2.54		30	Male	Black or African American	Not Hispanic or Latino	180.5	78.6	24.1	1.99	V
L.4	Lotion	Octocrylene	12	3.24		30	Male	Black or African American	Not Hispanic or Latino	180.5	78.6	24.1	1.99	V
L.4	Lotion	Octocrylene	14	2.52		30	Male	Black or African American	Not Hispanic or Latino	180.5	78.6	24.1	1.99	V
L.4	Lotion	Octocrylene	23	1.05		30	Male	Black or African American	Not Hispanic or Latino	180.5	78.6	24.1	1.99	V
L.4	Lotion	Octocrylene	28	1.18		30	Male	Black or African American	Not Hispanic or Latino	180.5	78.6	24.1	1.99	V
L.4	Lotion	Octocrylene	33	4.54		30	Male	Black or African American	Not Hispanic or Latino	180.5	78.6	24.1	1.99	V
L.4	Lotion	Octocrylene	47	1.58		30	Male	Black or African American	Not Hispanic or Latino	180.5	78.6	24.1	1.99	V
L.4	Lotion	Octocrylene	52	13.37		30	Male	Black or African American	Not Hispanic or Latino	180.5	78.6	24.1	1.99	V
L.4	Lotion	Octocrylene	57	5.02		30	Male	Black or African American	Not Hispanic or Latino	180.5	78.6	24.1	1.99	V
L.4	Lotion	Octocrylene	71	1.82		30	Male	Black or African American	Not Hispanic or Latino	180.5	78.6	24.1	1.99	V
L.4	Lotion	Octocrylene	73	1.86		30	Male	Black or African American	Not Hispanic or Latino	180.5	78.6	24.1	1.99	V
L.4	Lotion	Octocrylene	74	1.71		30	Male	Black or African American	Not Hispanic or Latino	180.5	78.6	24.1	1.99	V
L.4	Lotion	Octocrylene	76	1.96		30	Male	Black or African American	Not Hispanic or Latino	180.5	78.6	24.1	1.99	V
L.4	Lotion	Octocrylene	78	3.64		30	Male	Black or African American	Not Hispanic or Latino	180.5	78.6	24.1	1.99	V
L.4	Lotion	Octocrylene	81	2.98		30	Male	Black or African American	Not Hispanic or Latino	180.5	78.6	24.1	1.99	V
L.4	Lotion	Octocrylene	82	2.8		30	Male	Black or African American	Not Hispanic or Latino	180.5	78.6	24.1	1.99	V
L.4	Lotion	Octocrylene	84	2.62		30	Male	Black or African American	Not Hispanic or Latino	180.5	78.6	24.1	1.99	V
L.4	Lotion	Octocrylene	86	2.09		30	Male	Black or African American	Not Hispanic or Latino	180.5	78.6	24.1	1.99	V
L.4	Lotion	Octocrylene	95	1.55		30	Male	Black or African American	Not Hispanic or Latino	180.5	78.6	24.1	1.99	V
L.4	Lotion	Octocrylene	120	1.09		30	Male	Black or African American	Not Hispanic or Latino	180.5	78.6	24.1	1.99	V
L.4	Lotion	Octocrylene	144	2.69		30	Male	Black or African American	Not Hispanic or Latino	180.5	78.6	24.1	1.99	V
L.4	Lotion	Oxybenzone	0	0	< 0.4	30	Male	Black or African American	Not Hispanic or Latino	180.5	78.6	24.1	1.99	V
L.4	Lotion	Oxybenzone	0.5	9.54		30	Male	Black or African American	Not Hispanic or Latino	180.5	78.6	24.1	1.99	V
L.4	Lotion	Oxybenzone	1	12.91		30	Male	Black or African American	Not Hispanic or Latino	180.5	78.6	24.1	1.99	V
L.4	Lotion	Oxybenzone	1.5	19.16		30	Male	Black or African American	Not Hispanic or Latino	180.5	78.6	24.1	1.99	V
L.4	Lotion	Oxybenzone	2	13.01		30	Male	Black or African American	Not Hispanic or Latino	180.5	78.6	24.1	1.99	V
L.4	Lotion	Oxybenzone	4	61.61		30	Male	Black or African American	Not Hispanic or Latino	180.5	78.6	24.1	1.99	V
L.4	Lotion	Oxybenzone	6	65.68		30	Male	Black or African American	Not Hispanic or Latino	180.5	78.6	24.1	1.99	V
L.4	Lotion	Oxybenzone	8	100.93		30	Male	Black or African American	Not Hispanic or Latino	180.5	78.6	24.1	1.99	V
L.4	Lotion	Oxybenzone	9	112.94		30	Male	Black or African American	Not Hispanic or Latino	180.5	78.6	24.1	1.99	V
L.4	Lotion	Oxybenzone	10	73.38		30	Male	Black or African American	Not Hispanic or Latino	180.5	78.6	24.1	1.99	V
L.4	Lotion	Oxybenzone	12	77.77		30	Male	Black or African American	Not Hispanic or Latino	180.5	78.6	24.1	1.99	V
L.4	Lotion	Oxybenzone	14	76.11		30	Male	Black or African American	Not Hispanic or Latino	180.5	78.6	24.1	1.99	V
L.4	Lotion	Oxybenzone	23	42.29		30	Male	Black or African American	Not Hispanic or Latino	180.5	78.6	24.1	1.99	V
L.4	Lotion	Oxybenzone	28	62.09		30	Male	Black or African American	Not Hispanic or Latino	180.5	78.6	24.1	1.99	V
L.4	Lotion	Oxybenzone	33	62.94		30	Male	Black or African American	Not Hispanic or Latino	180.5	78.6	24.1	1.99	V
L.4	Lotion	Oxybenzone	47	57.03		30	Male	Black or African American	Not Hispanic or Latino	180.5	78.6	24.1	1.99	V
L.4	Lotion	Oxybenzone	52	59.86		30	Male	Black or African American	Not Hispanic or Latino	180.5	78.6	24.1	1.99	V
L.4	Lotion	Oxybenzone	57	67.09		30	Male	Black or African American	Not Hispanic or Latino	180.5	78.6	24.1	1.99	V
L.4	Lotion	Oxybenzone	71	81.82		30	Male	Black or African American	Not Hispanic or Latino	180.5	78.6	24.1	1.99	V
L.4	Lotion	Oxybenzone	73	89.97		30	Male	Black or African American	Not Hispanic or Latino	180.5	78.6	24.1	1.99	V
L.4	Lotion	Oxybenzone	74	70.16		30	Male	Black or African American	Not Hispanic or Latino	180.5	78.6	24.1	1.99	V
L.4	Lotion	Oxybenzone	76	77.93		30	Male	Black or African American	Not Hispanic or Latino	180.5	78.6	24.1	1.99	V
L.4	Lotion	Oxybenzone	78	68.04		30	Male	Black or African American	Not Hispanic or Latino	180.5	78.6	24.1	1.99	V
L.4	Lotion	Oxybenzone	81	63		30	Male	Black or African American	Not Hispanic or Latino	180.5	78.6	24.1	1.99	V
L.4	Lotion	Oxybenzone	82	56.43		30	Male	Black or African American	Not Hispanic or Latino	180.5	78.6	24.1	1.99	V
L.4	Lotion	Oxybenzone	84	48.93		30	Male	Black or African American	Not Hispanic or Latino	180.5	78.6	24.1	1.99	V
L.4	Lotion	Oxybenzone	86	49.82		30	Male	Black or African American	Not Hispanic or Latino	180.5	78.6	24.1	1.99	V
L.4	Lotion	Oxybenzone	95	40.04		30	Male	Black or African American	Not Hispanic or Latino	180.5	78.6	24.1	1.99	V
L.4	Lotion	Oxybenzone	120	26.92		30	Male	Black or African American	Not Hispanic or Latino	180.5	78.6	24.1	1.99	V
L.4	Lotion	Oxybenzone	144	21.49		30	Male	Black or African American	Not Hispanic or Latino	180.5	78.6	24.1	1.99	V
L.5	Lotion	Avobenzone	0	0	< 0.2	40	Female	Black or African American	Not Hispanic or Latino	178.5	85.2	26.7	2.06	V
L.5	Lotion	Avobenzone	0.5	0	< 0.2	40	Female	Black or African American	Not Hispanic or Latino	178.5	85.2	26.7	2.06	V
L.5	Lotion	Avobenzone	1	0	< 0.2	40	Female	Black or African American	Not Hispanic or Latino	178.5	85.2	26.7	2.06	V
L.5	Lotion	Avobenzone	1.5	0	< 0.2	40	Female	Black or African American	Not Hispanic or Latino	178.5	85.2	26.7	2.06	V
L.5	Lotion	Avobenzone	2	0	< 0.2	40	Female	Black or African American	Not Hispanic or Latino	178.5	85.2	26.7	2.06	V
L.5	Lotion	Avobenzone	4	0.61		40	Female	Black or African American	Not Hispanic or Latino	178.5	85.2	26.7	2.06	V
L.5	Lotion	Avobenzone	6	1.5		40	Female	Black or African American	Not Hispanic or Latino	178.5	85.2	26.7	2.06	V
L.5	Lotion	Avobenzone	8	0.73		40	Female	Black or African American	Not Hispanic or Latino	178.5	85.2	26.7	2.06	V
L.5	Lotion	Avobenzone	9	1.08		40	Female	Black or African American	Not Hispanic or Latino	178.5	85.2	26.7	2.06	V
L.5	Lotion	Avobenzone	10	1		40	Female	Black or African American	Not Hispanic or Latino	178.5	85.2	26.7	2.06	V
L.5	Lotion	Avobenzone	12	1.28		40	Female	Black or African American	Not Hispanic or Latino	178.5	85.2	26.7	2.06	V
L.5	Lotion	Avobenzone	14	1.26		40	Female	Black or African American	Not Hispanic or Latino	178.5	85.2	26.7	2.06	V
L.5	Lotion	Avobenzone	23	0.91		40	Female	Black or African American	Not Hispanic or Latino	178.5	85.2	26.7	2.06	V
L.5	Lotion	Avobenzone	28	1.28		40	Female	Black or African American	Not Hispanic or Latino	178.5	85.2	26.7	2.06	V
L.5	Lotion	Avobenzone	33	3.24		40	Female	Black or African American	Not Hispanic or Latino	178.5	85.2	26.7	2.06	V
L.5	Lotion	Avobenzone	47	1.45		40	Female	Black or African American	Not Hispanic or Latino	178.5	85.2	26.7	2.06	V
L.5	Lotion	Avobenzone	52	1.94		40	Female	Black or African American	Not Hispanic or Latino	178.5	85.2	26.7	2.06	V
L.5	Lotion	Avobenzone	57	2.11		40	Female	Black or African American	Not Hispanic or Latino	178.5	85.2	26.7	2.06	V
L.5	Lotion	Avobenzone	71	1.22		40	Female	Black or African American	Not Hispanic or Latino	178.5	85.2	26.7	2.06	V
L.5	Lotion	Avobenzone	73	1.32		40	Female	Black or African American	Not Hispanic or Latino	178.5	85.2	26.7	2.06	V
L.5	Lotion	Avobenzone	74	1.15		40	Female	Black or African American	Not Hispanic or Latino	178.5	85.2	26.7	2.06	V
L.5	Lotion	Avobenzone	76	1.09		40	Female	Black or African American	Not Hispanic or Latino	178.5	85.2	26.7	2.06	V
L.5	Lotion	Avobenzone	78	1.64		40	Female	Black or African American	Not Hispanic or Latino	178.5	85.2	26.7	2.06	V
L.5	Lotion	Avobenzone	81	1.34		40	Female	Black or African American	Not Hispanic or Latino	178.5	85.2	26.7	2.06	V
L.5	Lotion	Avobenzone	82	0.86		40	Female	Black or African American	Not Hispanic or Latino	178.5	85.2	26.7	2.06	V
L.5	Lotion	Avobenzone	84	2		40	Female	Black or African American	Not Hispanic or Latino	178.5	85.2	26.7	2.06	V
L.5	Lotion	Avobenzone	86	1.87		40	Female	Black or African American	Not Hispanic or Latino	178.5	85.2	26.7	2.06	V
L.5	Lotion	Avobenzone	95	1.65		40	Female	Black or African American	Not Hispanic or Latino	178.5	85.2	26.7	2.06	V
L.5	Lotion	Avobenzone	120	1		40	Female	Black or African American	Not Hispanic or Latino	178.5	85.2	26.7	2.06	V
L.5	Lotion	Avobenzone	144	0.62		40	Female	Black or African American	Not Hispanic or Latino	178.5	85.2	26.7	2.06	V
L.5	Lotion	Octocrylene	0	0	< 0.4	40	Female	Black or African American	Not Hispanic or Latino	178.5	85.2	26.7	2.06	V
L.5	Lotion	Octocrylene	0.5	0	< 0.4	40	Female	Black or African American	Not Hispanic or Latino	178.5	85.2	26.7	2.06	V
L.5	Lotion	Octocrylene	1	0	< 0.4	40	Female	Black or African American	Not Hispanic or Latino	178.5	85.2	26.7	2.06	V
L.5	Lotion	Octocrylene	1.5	0	< 0.4	40	Female	Black or African American	Not Hispanic or Latino	178.5	85.2	26.7	2.06	V
L.5	Lotion	Octocrylene	2	0	< 0.4	40	Female	Black or African American	Not Hispanic or Latino	178.5	85.2	26.7	2.06	V
L.5	Lotion	Octocrylene	4	0.5		40	Female	Black or African American	Not Hispanic or Latino	178.5	85.2	26.7	2.06	V
L.5	Lotion	Octocrylene	6	1.56		40	Female	Black or African American	Not Hispanic or Latino	178.5	85.2	26.7	2.06	V
L.5	Lotion	Octocrylene	8	0.84		40	Female	Black or African American	Not Hispanic or Latino	178.5	85.2	26.7	2.06	V
L.5	Lotion	Octocrylene	9	1.4		40	Female	Black or African American	Not Hispanic or Latino	178.5	85.2	26.7	2.06	V
L.5	Lotion	Octocrylene	10	1.35		40	Female	Black or African American	Not Hispanic or Latino	178.5	85.2	26.7	2.06	V
L.5	Lotion	Octocrylene	12	1.64		40	Female	Black or African American	Not Hispanic or Latino	178.5	85.2	26.7	2.06	V
L.5	Lotion	Octocrylene	14	1.72		40	Female	Black or African American	Not Hispanic or Latino	178.5	85.2	26.7	2.06	V
L.5	Lotion	Octocrylene	23	1.18		40	Female	Black or African American	Not Hispanic or Latino	178.5	85.2	26.7	2.06	V
L.5	Lotion	Octocrylene	28	1.68		40	Female	Black or African American	Not Hispanic or Latino	178.5	85.2	26.7	2.06	V
L.5	Lotion	Octocrylene	33	3.62		40	Female	Black or African American	Not Hispanic or Latino	178.5	85.2	26.7	2.06	V
L.5	Lotion	Octocrylene	47	1.64		40	Female	Black or African American	Not Hispanic or Latino	178.5	85.2	26.7	2.06	V
L.5	Lotion	Octocrylene	52	1.94		40	Female	Black or African American	Not Hispanic or Latino	178.5	85.2	26.7	2.06	V
L.5	Lotion	Octocrylene	57	2.91		40	Female	Black or African American	Not Hispanic or Latino	178.5	85.2	26.7	2.06	V
L.5	Lotion	Octocrylene	71	2.18		40	Female	Black or African American	Not Hispanic or Latino	178.5	85.2	26.7	2.06	V
L.5	Lotion	Octocrylene	73	2.19		40	Female	Black or African American	Not Hispanic or Latino	178.5	85.2	26.7	2.06	V
L.5	Lotion	Octocrylene	74	2.08		40	Female	Black or African American	Not Hispanic or Latino	178.5	85.2	26.7	2.06	V
L.5	Lotion	Octocrylene	76	1.38		40	Female	Black or African American	Not Hispanic or Latino	178.5	85.2	26.7	2.06	V
L.5	Lotion	Octocrylene	78	1.54		40	Female	Black or African American	Not Hispanic or Latino	178.5	85.2	26.7	2.06	V
L.5	Lotion	Octocrylene	81	1.51		40	Female	Black or African American	Not Hispanic or Latino	178.5	85.2	26.7	2.06	V
L.5	Lotion	Octocrylene	82	1.65		40	Female	Black or African American	Not Hispanic or Latino	178.5	85.2	26.7	2.06	V
L.5	Lotion	Octocrylene	84	2.28		40	Female	Black or African American	Not Hispanic or Latino	178.5	85.2	26.7	2.06	V
L.5	Lotion	Octocrylene	86	2.49		40	Female	Black or African American	Not Hispanic or Latino	178.5	85.2	26.7	2.06	V
L.5	Lotion	Octocrylene	95	2.15		40	Female	Black or African American	Not Hispanic or Latino	178.5	85.2	26.7	2.06	V
L.5	Lotion	Octocrylene	120	1.21		40	Female	Black or African American	Not Hispanic or Latino	178.5	85.2	26.7	2.06	V
L.5	Lotion	Octocrylene	144	1.02		40	Female	Black or African American	Not Hispanic or Latino	178.5	85.2	26.7	2.06	V
L.5	Lotion	Oxybenzone	0	0	< 0.4	40	Female	Black or African American	Not Hispanic or Latino	178.5	85.2	26.7	2.06	V
L.5	Lotion	Oxybenzone	0.5	7.02		40	Female	Black or African American	Not Hispanic or Latino	178.5	85.2	26.7	2.06	V
L.5	Lotion	Oxybenzone	1	11.76		40	Female	Black or African American	Not Hispanic or Latino	178.5	85.2	26.7	2.06	V
L.5	Lotion	Oxybenzone	1.5	22.97		40	Female	Black or African American	Not Hispanic or Latino	178.5	85.2	26.7	2.06	V
L.5	Lotion	Oxybenzone	2	16.62		40	Female	Black or African American	Not Hispanic or Latino	178.5	85.2	26.7	2.06	V
L.5	Lotion	Oxybenzone	4	66.96		40	Female	Black or African American	Not Hispanic or Latino	178.5	85.2	26.7	2.06	V
L.5	Lotion	Oxybenzone	6	192.24		40	Female	Black or African American	Not Hispanic or Latino	178.5	85.2	26.7	2.06	V
L.5	Lotion	Oxybenzone	8	55.4		40	Female	Black or African American	Not Hispanic or Latino	178.5	85.2	26.7	2.06	V
L.5	Lotion	Oxybenzone	9	51.2		40	Female	Black or African American	Not Hispanic or Latino	178.5	85.2	26.7	2.06	V
L.5	Lotion	Oxybenzone	10	89.24		40	Female	Black or African American	Not Hispanic or Latino	178.5	85.2	26.7	2.06	V
L.5	Lotion	Oxybenzone	12	79.68		40	Female	Black or African American	Not Hispanic or Latino	178.5	85.2	26.7	2.06	V
L.5	Lotion	Oxybenzone	14	71.3		40	Female	Black or African American	Not Hispanic or Latino	178.5	85.2	26.7	2.06	V
L.5	Lotion	Oxybenzone	23	40.82		40	Female	Black or African American	Not Hispanic or Latino	178.5	85.2	26.7	2.06	V
L.5	Lotion	Oxybenzone	28	67.95		40	Female	Black or African American	Not Hispanic or Latino	178.5	85.2	26.7	2.06	V
L.5	Lotion	Oxybenzone	33	274.59		40	Female	Black or African American	Not Hispanic or Latino	178.5	85.2	26.7	2.06	V
L.5	Lotion	Oxybenzone	47	49.67		40	Female	Black or African American	Not Hispanic or Latino	178.5	85.2	26.7	2.06	V
L.5	Lotion	Oxybenzone	52	100.29		40	Female	Black or African American	Not Hispanic or Latino	178.5	85.2	26.7	2.06	V
L.5	Lotion	Oxybenzone	57	81.78		40	Female	Black or African American	Not Hispanic or Latino	178.5	85.2	26.7	2.06	V
L.5	Lotion	Oxybenzone	71	33.22		40	Female	Black or African American	Not Hispanic or Latino	178.5	85.2	26.7	2.06	V
L.5	Lotion	Oxybenzone	73	58.91		40	Female	Black or African American	Not Hispanic or Latino	178.5	85.2	26.7	2.06	V
L.5	Lotion	Oxybenzone	74	61.55		40	Female	Black or African American	Not Hispanic or Latino	178.5	85.2	26.7	2.06	V
L.5	Lotion	Oxybenzone	76	51.32		40	Female	Black or African American	Not Hispanic or Latino	178.5	85.2	26.7	2.06	V
L.5	Lotion	Oxybenzone	78	61.86		40	Female	Black or African American	Not Hispanic or Latino	178.5	85.2	26.7	2.06	V
L.5	Lotion	Oxybenzone	81	55.68		40	Female	Black or African American	Not Hispanic or Latino	178.5	85.2	26.7	2.06	V
L.5	Lotion	Oxybenzone	82	38.64		40	Female	Black or African American	Not Hispanic or Latino	178.5	85.2	26.7	2.06	V
L.5	Lotion	Oxybenzone	84	69.84		40	Female	Black or African American	Not Hispanic or Latino	178.5	85.2	26.7	2.06	V
L.5	Lotion	Oxybenzone	86	67.85		40	Female	Black or African American	Not Hispanic or Latino	178.5	85.2	26.7	2.06	V
L.5	Lotion	Oxybenzone	95	57.22		40	Female	Black or African American	Not Hispanic or Latino	178.5	85.2	26.7	2.06	V
L.5	Lotion	Oxybenzone	120	22.39		40	Female	Black or African American	Not Hispanic or Latino	178.5	85.2	26.7	2.06	V
L.5	Lotion	Oxybenzone	144	14.01		40	Female	Black or African American	Not Hispanic or Latino	178.5	85.2	26.7	2.06	V
L.6	Lotion	Avobenzone	0	0	< 0.2	31	Male	Black or African American	Not Hispanic or Latino	181	95.2	29.1	2.19	IV
L.6	Lotion	Avobenzone	0.5	0	< 0.2	31	Male	Black or African American	Not Hispanic or Latino	181	95.2	29.1	2.19	IV
L.6	Lotion	Avobenzone	1	0	< 0.2	31	Male	Black or African American	Not Hispanic or Latino	181	95.2	29.1	2.19	IV
L.6	Lotion	Avobenzone	1.5	0	< 0.2	31	Male	Black or African American	Not Hispanic or Latino	181	95.2	29.1	2.19	IV
L.6	Lotion	Avobenzone	2	0	< 0.2	31	Male	Black or African American	Not Hispanic or Latino	181	95.2	29.1	2.19	IV
L.6	Lotion	Avobenzone	4	0	< 0.2	31	Male	Black or African American	Not Hispanic or Latino	181	95.2	29.1	2.19	IV
L.6	Lotion	Avobenzone	6	0.31		31	Male	Black or African American	Not Hispanic or Latino	181	95.2	29.1	2.19	IV
L.6	Lotion	Avobenzone	8	0.59		31	Male	Black or African American	Not Hispanic or Latino	181	95.2	29.1	2.19	IV
L.6	Lotion	Avobenzone	9	0.62		31	Male	Black or African American	Not Hispanic or Latino	181	95.2	29.1	2.19	IV
L.6	Lotion	Avobenzone	10	0.66		31	Male	Black or African American	Not Hispanic or Latino	181	95.2	29.1	2.19	IV
L.6	Lotion	Avobenzone	12	0.99		31	Male	Black or African American	Not Hispanic or Latino	181	95.2	29.1	2.19	IV
L.6	Lotion	Avobenzone	14	0.91		31	Male	Black or African American	Not Hispanic or Latino	181	95.2	29.1	2.19	IV
L.6	Lotion	Avobenzone	23	0.5		31	Male	Black or African American	Not Hispanic or Latino	181	95.2	29.1	2.19	IV
L.6	Lotion	Avobenzone	28	1.09		31	Male	Black or African American	Not Hispanic or Latino	181	95.2	29.1	2.19	IV
L.6	Lotion	Avobenzone	33	1.41		31	Male	Black or African American	Not Hispanic or Latino	181	95.2	29.1	2.19	IV
L.6	Lotion	Avobenzone	47	0.98		31	Male	Black or African American	Not Hispanic or Latino	181	95.2	29.1	2.19	IV
L.6	Lotion	Avobenzone	52	1.25		31	Male	Black or African American	Not Hispanic or Latino	181	95.2	29.1	2.19	IV
L.6	Lotion	Avobenzone	57	1.57		31	Male	Black or African American	Not Hispanic or Latino	181	95.2	29.1	2.19	IV
L.6	Lotion	Avobenzone	71	1.6		31	Male	Black or African American	Not Hispanic or Latino	181	95.2	29.1	2.19	IV
L.6	Lotion	Avobenzone	73	1.1		31	Male	Black or African American	Not Hispanic or Latino	181	95.2	29.1	2.19	IV
L.6	Lotion	Avobenzone	74	1.05		31	Male	Black or African American	Not Hispanic or Latino	181	95.2	29.1	2.19	IV
L.6	Lotion	Avobenzone	76	1.32		31	Male	Black or African American	Not Hispanic or Latino	181	95.2	29.1	2.19	IV
L.6	Lotion	Avobenzone	78	2.82		31	Male	Black or African American	Not Hispanic or Latino	181	95.2	29.1	2.19	IV
L.6	Lotion	Avobenzone	81	1.59		31	Male	Black or African American	Not Hispanic or Latino	181	95.2	29.1	2.19	IV
L.6	Lotion	Avobenzone	82	1.35		31	Male	Black or African American	Not Hispanic or Latino	181	95.2	29.1	2.19	IV
L.6	Lotion	Avobenzone	84	1.25		31	Male	Black or African American	Not Hispanic or Latino	181	95.2	29.1	2.19	IV
L.6	Lotion	Avobenzone	86	1.15		31	Male	Black or African American	Not Hispanic or Latino	181	95.2	29.1	2.19	IV
L.6	Lotion	Avobenzone	95	1.51		31	Male	Black or African American	Not Hispanic or Latino	181	95.2	29.1	2.19	IV
L.6	Lotion	Avobenzone	120	0.8		31	Male	Black or African American	Not Hispanic or Latino	181	95.2	29.1	2.19	IV
L.6	Lotion	Avobenzone	144	1.07		31	Male	Black or African American	Not Hispanic or Latino	181	95.2	29.1	2.19	IV
L.6	Lotion	Octocrylene	0	0	< 0.4	31	Male	Black or African American	Not Hispanic or Latino	181	95.2	29.1	2.19	IV
L.6	Lotion	Octocrylene	0.5	0	< 0.4	31	Male	Black or African American	Not Hispanic or Latino	181	95.2	29.1	2.19	IV
L.6	Lotion	Octocrylene	1	0	< 0.4	31	Male	Black or African American	Not Hispanic or Latino	181	95.2	29.1	2.19	IV
L.6	Lotion	Octocrylene	1.5	0	< 0.4	31	Male	Black or African American	Not Hispanic or Latino	181	95.2	29.1	2.19	IV
L.6	Lotion	Octocrylene	2	0	< 0.4	31	Male	Black or African American	Not Hispanic or Latino	181	95.2	29.1	2.19	IV
L.6	Lotion	Octocrylene	4	0	< 0.4	31	Male	Black or African American	Not Hispanic or Latino	181	95.2	29.1	2.19	IV
L.6	Lotion	Octocrylene	6	0.54		31	Male	Black or African American	Not Hispanic or Latino	181	95.2	29.1	2.19	IV
L.6	Lotion	Octocrylene	8	1.05		31	Male	Black or African American	Not Hispanic or Latino	181	95.2	29.1	2.19	IV
L.6	Lotion	Octocrylene	9	0.82		31	Male	Black or African American	Not Hispanic or Latino	181	95.2	29.1	2.19	IV
L.6	Lotion	Octocrylene	10	0.76		31	Male	Black or African American	Not Hispanic or Latino	181	95.2	29.1	2.19	IV
L.6	Lotion	Octocrylene	12	1.05		31	Male	Black or African American	Not Hispanic or Latino	181	95.2	29.1	2.19	IV
L.6	Lotion	Octocrylene	14	1.22		31	Male	Black or African American	Not Hispanic or Latino	181	95.2	29.1	2.19	IV
L.6	Lotion	Octocrylene	23	0.72		31	Male	Black or African American	Not Hispanic or Latino	181	95.2	29.1	2.19	IV
L.6	Lotion	Octocrylene	28	1.14		31	Male	Black or African American	Not Hispanic or Latino	181	95.2	29.1	2.19	IV
L.6	Lotion	Octocrylene	33	1.94		31	Male	Black or African American	Not Hispanic or Latino	181	95.2	29.1	2.19	IV
L.6	Lotion	Octocrylene	47	1.04		31	Male	Black or African American	Not Hispanic or Latino	181	95.2	29.1	2.19	IV
L.6	Lotion	Octocrylene	52	1.34		31	Male	Black or African American	Not Hispanic or Latino	181	95.2	29.1	2.19	IV
L.6	Lotion	Octocrylene	57	1.89		31	Male	Black or African American	Not Hispanic or Latino	181	95.2	29.1	2.19	IV
L.6	Lotion	Octocrylene	71	1.87		31	Male	Black or African American	Not Hispanic or Latino	181	95.2	29.1	2.19	IV
L.6	Lotion	Octocrylene	73	1.32		31	Male	Black or African American	Not Hispanic or Latino	181	95.2	29.1	2.19	IV
L.6	Lotion	Octocrylene	74	1.45		31	Male	Black or African American	Not Hispanic or Latino	181	95.2	29.1	2.19	IV
L.6	Lotion	Octocrylene	76	1.5		31	Male	Black or African American	Not Hispanic or Latino	181	95.2	29.1	2.19	IV
L.6	Lotion	Octocrylene	78	4.58		31	Male	Black or African American	Not Hispanic or Latino	181	95.2	29.1	2.19	IV
L.6	Lotion	Octocrylene	81	1.54		31	Male	Black or African American	Not Hispanic or Latino	181	95.2	29.1	2.19	IV
L.6	Lotion	Octocrylene	82	1.38		31	Male	Black or African American	Not Hispanic or Latino	181	95.2	29.1	2.19	IV
L.6	Lotion	Octocrylene	84	1.34		31	Male	Black or African American	Not Hispanic or Latino	181	95.2	29.1	2.19	IV
L.6	Lotion	Octocrylene	86	1.09		31	Male	Black or African American	Not Hispanic or Latino	181	95.2	29.1	2.19	IV
L.6	Lotion	Octocrylene	95	1.57		31	Male	Black or African American	Not Hispanic or Latino	181	95.2	29.1	2.19	IV
L.6	Lotion	Octocrylene	120	1.17		31	Male	Black or African American	Not Hispanic or Latino	181	95.2	29.1	2.19	IV
L.6	Lotion	Octocrylene	144	2.34		31	Male	Black or African American	Not Hispanic or Latino	181	95.2	29.1	2.19	IV
L.6	Lotion	Oxybenzone	0	0	< 0.4	31	Male	Black or African American	Not Hispanic or Latino	181	95.2	29.1	2.19	IV
L.6	Lotion	Oxybenzone	0.5	9		31	Male	Black or African American	Not Hispanic or Latino	181	95.2	29.1	2.19	IV
L.6	Lotion	Oxybenzone	1	47.65		31	Male	Black or African American	Not Hispanic or Latino	181	95.2	29.1	2.19	IV
L.6	Lotion	Oxybenzone	1.5	71.2		31	Male	Black or African American	Not Hispanic or Latino	181	95.2	29.1	2.19	IV
L.6	Lotion	Oxybenzone	2	112.28		31	Male	Black or African American	Not Hispanic or Latino	181	95.2	29.1	2.19	IV
L.6	Lotion	Oxybenzone	4	90.65		31	Male	Black or African American	Not Hispanic or Latino	181	95.2	29.1	2.19	IV
L.6	Lotion	Oxybenzone	6	132.82		31	Male	Black or African American	Not Hispanic or Latino	181	95.2	29.1	2.19	IV
L.6	Lotion	Oxybenzone	8	222.82		31	Male	Black or African American	Not Hispanic or Latino	181	95.2	29.1	2.19	IV
L.6	Lotion	Oxybenzone	9	176.29		31	Male	Black or African American	Not Hispanic or Latino	181	95.2	29.1	2.19	IV
L.6	Lotion	Oxybenzone	10	270.16		31	Male	Black or African American	Not Hispanic or Latino	181	95.2	29.1	2.19	IV
L.6	Lotion	Oxybenzone	12	65.64		31	Male	Black or African American	Not Hispanic or Latino	181	95.2	29.1	2.19	IV
L.6	Lotion	Oxybenzone	14	66.1		31	Male	Black or African American	Not Hispanic or Latino	181	95.2	29.1	2.19	IV
L.6	Lotion	Oxybenzone	23	63.95		31	Male	Black or African American	Not Hispanic or Latino	181	95.2	29.1	2.19	IV
L.6	Lotion	Oxybenzone	28	158.22		31	Male	Black or African American	Not Hispanic or Latino	181	95.2	29.1	2.19	IV
L.6	Lotion	Oxybenzone	33	57.21		31	Male	Black or African American	Not Hispanic or Latino	181	95.2	29.1	2.19	IV
L.6	Lotion	Oxybenzone	47	72.62		31	Male	Black or African American	Not Hispanic or Latino	181	95.2	29.1	2.19	IV
L.6	Lotion	Oxybenzone	52	121.73		31	Male	Black or African American	Not Hispanic or Latino	181	95.2	29.1	2.19	IV
L.6	Lotion	Oxybenzone	57	134.11		31	Male	Black or African American	Not Hispanic or Latino	181	95.2	29.1	2.19	IV
L.6	Lotion	Oxybenzone	71	150.72		31	Male	Black or African American	Not Hispanic or Latino	181	95.2	29.1	2.19	IV
L.6	Lotion	Oxybenzone	73	135.35		31	Male	Black or African American	Not Hispanic or Latino	181	95.2	29.1	2.19	IV
L.6	Lotion	Oxybenzone	74	156.46		31	Male	Black or African American	Not Hispanic or Latino	181	95.2	29.1	2.19	IV
L.6	Lotion	Oxybenzone	76	87.43		31	Male	Black or African American	Not Hispanic or Latino	181	95.2	29.1	2.19	IV
L.6	Lotion	Oxybenzone	78	186.42		31	Male	Black or African American	Not Hispanic or Latino	181	95.2	29.1	2.19	IV
L.6	Lotion	Oxybenzone	81	146.49		31	Male	Black or African American	Not Hispanic or Latino	181	95.2	29.1	2.19	IV
L.6	Lotion	Oxybenzone	82	77.62		31	Male	Black or African American	Not Hispanic or Latino	181	95.2	29.1	2.19	IV
L.6	Lotion	Oxybenzone	84	70.67		31	Male	Black or African American	Not Hispanic or Latino	181	95.2	29.1	2.19	IV
L.6	Lotion	Oxybenzone	86	67.64		31	Male	Black or African American	Not Hispanic or Latino	181	95.2	29.1	2.19	IV
L.6	Lotion	Oxybenzone	95	102.59		31	Male	Black or African American	Not Hispanic or Latino	181	95.2	29.1	2.19	IV
L.6	Lotion	Oxybenzone	120	58.5		31	Male	Black or African American	Not Hispanic or Latino	181	95.2	29.1	2.19	IV
L.6	Lotion	Oxybenzone	144	86.81		31	Male	Black or African American	Not Hispanic or Latino	181	95.2	29.1	2.19	IV
S1.1	Spray #1	Avobenzone	0	0	< 0.2	30	Female	White	Not Hispanic or Latino	163.5	61.6	23	1.67	III
S1.1	Spray #1	Avobenzone	0.5	0	< 0.2	30	Female	White	Not Hispanic or Latino	163.5	61.6	23	1.67	III
S1.1	Spray #1	Avobenzone	1	0	< 0.2	30	Female	White	Not Hispanic or Latino	163.5	61.6	23	1.67	III
S1.1	Spray #1	Avobenzone	1.5	0	< 0.2	30	Female	White	Not Hispanic or Latino	163.5	61.6	23	1.67	III
S1.1	Spray #1	Avobenzone	2	0	< 0.2	30	Female	White	Not Hispanic or Latino	163.5	61.6	23	1.67	III
S1.1	Spray #1	Avobenzone	4	0.68		30	Female	White	Not Hispanic or Latino	163.5	61.6	23	1.67	III
S1.1	Spray #1	Avobenzone	6	0.95		30	Female	White	Not Hispanic or Latino	163.5	61.6	23	1.67	III
S1.1	Spray #1	Avobenzone	8	0.9		30	Female	White	Not Hispanic or Latino	163.5	61.6	23	1.67	III
S1.1	Spray #1	Avobenzone	9	0.94		30	Female	White	Not Hispanic or Latino	163.5	61.6	23	1.67	III
S1.1	Spray #1	Avobenzone	10	0.99		30	Female	White	Not Hispanic or Latino	163.5	61.6	23	1.67	III
S1.1	Spray #1	Avobenzone	12	1.4		30	Female	White	Not Hispanic or Latino	163.5	61.6	23	1.67	III
S1.1	Spray #1	Avobenzone	14	1.46		30	Female	White	Not Hispanic or Latino	163.5	61.6	23	1.67	III
S1.1	Spray #1	Avobenzone	23	1.72		30	Female	White	Not Hispanic or Latino	163.5	61.6	23	1.67	III
S1.1	Spray #1	Avobenzone	28	1.62		30	Female	White	Not Hispanic or Latino	163.5	61.6	23	1.67	III
S1.1	Spray #1	Avobenzone	33	1.69		30	Female	White	Not Hispanic or Latino	163.5	61.6	23	1.67	III
S1.1	Spray #1	Avobenzone	47	2.38		30	Female	White	Not Hispanic or Latino	163.5	61.6	23	1.67	III
S1.1	Spray #1	Avobenzone	52	1.5		30	Female	White	Not Hispanic or Latino	163.5	61.6	23	1.67	III
S1.1	Spray #1	Avobenzone	57	2.76		30	Female	White	Not Hispanic or Latino	163.5	61.6	23	1.67	III
S1.1	Spray #1	Avobenzone	71	2.27		30	Female	White	Not Hispanic or Latino	163.5	61.6	23	1.67	III
S1.1	Spray #1	Avobenzone	73	2.78		30	Female	White	Not Hispanic or Latino	163.5	61.6	23	1.67	III
S1.1	Spray #1	Avobenzone	74	1.58		30	Female	White	Not Hispanic or Latino	163.5	61.6	23	1.67	III
S1.1	Spray #1	Avobenzone	76	3.88		30	Female	White	Not Hispanic or Latino	163.5	61.6	23	1.67	III
S1.1	Spray #1	Avobenzone	78	4.88		30	Female	White	Not Hispanic or Latino	163.5	61.6	23	1.67	III
S1.1	Spray #1	Avobenzone	81	2.83		30	Female	White	Not Hispanic or Latino	163.5	61.6	23	1.67	III
S1.1	Spray #1	Avobenzone	82	3.61		30	Female	White	Not Hispanic or Latino	163.5	61.6	23	1.67	III
S1.1	Spray #1	Avobenzone	84	3.8		30	Female	White	Not Hispanic or Latino	163.5	61.6	23	1.67	III
S1.1	Spray #1	Avobenzone	86	3.12		30	Female	White	Not Hispanic or Latino	163.5	61.6	23	1.67	III
S1.1	Spray #1	Avobenzone	95	3.56		30	Female	White	Not Hispanic or Latino	163.5	61.6	23	1.67	III
S1.1	Spray #1	Avobenzone	120	1.9		30	Female	White	Not Hispanic or Latino	163.5	61.6	23	1.67	III
S1.1	Spray #1	Avobenzone	144	1.77		30	Female	White	Not Hispanic or Latino	163.5	61.6	23	1.67	III
S1.1	Spray #1	Octocrylene	0	0	< 0.4	30	Female	White	Not Hispanic or Latino	163.5	61.6	23	1.67	III
S1.1	Spray #1	Octocrylene	0.5	0	< 0.4	30	Female	White	Not Hispanic or Latino	163.5	61.6	23	1.67	III
S1.1	Spray #1	Octocrylene	1	0	< 0.4	30	Female	White	Not Hispanic or Latino	163.5	61.6	23	1.67	III
S1.1	Spray #1	Octocrylene	1.5	0	< 0.4	30	Female	White	Not Hispanic or Latino	163.5	61.6	23	1.67	III
S1.1	Spray #1	Octocrylene	2	0	< 0.4	30	Female	White	Not Hispanic or Latino	163.5	61.6	23	1.67	III
S1.1	Spray #1	Octocrylene	4	0	< 0.4	30	Female	White	Not Hispanic or Latino	163.5	61.6	23	1.67	III
S1.1	Spray #1	Octocrylene	6	0	< 0.4	30	Female	White	Not Hispanic or Latino	163.5	61.6	23	1.67	III
S1.1	Spray #1	Octocrylene	8	0.43		30	Female	White	Not Hispanic or Latino	163.5	61.6	23	1.67	III
S1.1	Spray #1	Octocrylene	9	0	< 0.4	30	Female	White	Not Hispanic or Latino	163.5	61.6	23	1.67	III
S1.1	Spray #1	Octocrylene	10	0.42		30	Female	White	Not Hispanic or Latino	163.5	61.6	23	1.67	III
S1.1	Spray #1	Octocrylene	12	0.69		30	Female	White	Not Hispanic or Latino	163.5	61.6	23	1.67	III
S1.1	Spray #1	Octocrylene	14	0.58		30	Female	White	Not Hispanic or Latino	163.5	61.6	23	1.67	III
S1.1	Spray #1	Octocrylene	23	0.89		30	Female	White	Not Hispanic or Latino	163.5	61.6	23	1.67	III
S1.1	Spray #1	Octocrylene	28	0.88		30	Female	White	Not Hispanic or Latino	163.5	61.6	23	1.67	III
S1.1	Spray #1	Octocrylene	33	0.88		30	Female	White	Not Hispanic or Latino	163.5	61.6	23	1.67	III
S1.1	Spray #1	Octocrylene	47	1.26		30	Female	White	Not Hispanic or Latino	163.5	61.6	23	1.67	III
S1.1	Spray #1	Octocrylene	52	0.69		30	Female	White	Not Hispanic or Latino	163.5	61.6	23	1.67	III
S1.1	Spray #1	Octocrylene	57	1.06		30	Female	White	Not Hispanic or Latino	163.5	61.6	23	1.67	III
S1.1	Spray #1	Octocrylene	71	1.34		30	Female	White	Not Hispanic or Latino	163.5	61.6	23	1.67	III
S1.1	Spray #1	Octocrylene	73	1.63		30	Female	White	Not Hispanic or Latino	163.5	61.6	23	1.67	III
S1.1	Spray #1	Octocrylene	74	1.05		30	Female	White	Not Hispanic or Latino	163.5	61.6	23	1.67	III
S1.1	Spray #1	Octocrylene	76	3.82		30	Female	White	Not Hispanic or Latino	163.5	61.6	23	1.67	III
S1.1	Spray #1	Octocrylene	78	3.4		30	Female	White	Not Hispanic or Latino	163.5	61.6	23	1.67	III
S1.1	Spray #1	Octocrylene	81	1.59		30	Female	White	Not Hispanic or Latino	163.5	61.6	23	1.67	III
S1.1	Spray #1	Octocrylene	82	1.37		30	Female	White	Not Hispanic or Latino	163.5	61.6	23	1.67	III
S1.1	Spray #1	Octocrylene	84	1.75		30	Female	White	Not Hispanic or Latino	163.5	61.6	23	1.67	III
S1.1	Spray #1	Octocrylene	86	1.24		30	Female	White	Not Hispanic or Latino	163.5	61.6	23	1.67	III
S1.1	Spray #1	Octocrylene	95	1.58		30	Female	White	Not Hispanic or Latino	163.5	61.6	23	1.67	III
S1.1	Spray #1	Octocrylene	120	2.65		30	Female	White	Not Hispanic or Latino	163.5	61.6	23	1.67	III
S1.1	Spray #1	Octocrylene	144	0.86		30	Female	White	Not Hispanic or Latino	163.5	61.6	23	1.67	III
S1.1	Spray #1	Oxybenzone	0	0	< 0.4	30	Female	White	Not Hispanic or Latino	163.5	61.6	23	1.67	III
S1.1	Spray #1	Oxybenzone	0.5	5.73		30	Female	White	Not Hispanic or Latino	163.5	61.6	23	1.67	III
S1.1	Spray #1	Oxybenzone	1	34.25		30	Female	White	Not Hispanic or Latino	163.5	61.6	23	1.67	III
S1.1	Spray #1	Oxybenzone	1.5	72.03		30	Female	White	Not Hispanic or Latino	163.5	61.6	23	1.67	III
S1.1	Spray #1	Oxybenzone	2	30.37		30	Female	White	Not Hispanic or Latino	163.5	61.6	23	1.67	III
S1.1	Spray #1	Oxybenzone	4	248.91		30	Female	White	Not Hispanic or Latino	163.5	61.6	23	1.67	III
S1.1	Spray #1	Oxybenzone	6	123.67		30	Female	White	Not Hispanic or Latino	163.5	61.6	23	1.67	III
S1.1	Spray #1	Oxybenzone	8	118.15		30	Female	White	Not Hispanic or Latino	163.5	61.6	23	1.67	III
S1.1	Spray #1	Oxybenzone	9	88.11		30	Female	White	Not Hispanic or Latino	163.5	61.6	23	1.67	III
S1.1	Spray #1	Oxybenzone	10	158.26		30	Female	White	Not Hispanic or Latino	163.5	61.6	23	1.67	III
S1.1	Spray #1	Oxybenzone	12	144.26		30	Female	White	Not Hispanic or Latino	163.5	61.6	23	1.67	III
S1.1	Spray #1	Oxybenzone	14	158.5		30	Female	White	Not Hispanic or Latino	163.5	61.6	23	1.67	III
S1.1	Spray #1	Oxybenzone	23	56.37		30	Female	White	Not Hispanic or Latino	163.5	61.6	23	1.67	III
S1.1	Spray #1	Oxybenzone	28	187.06		30	Female	White	Not Hispanic or Latino	163.5	61.6	23	1.67	III
S1.1	Spray #1	Oxybenzone	33	132.37		30	Female	White	Not Hispanic or Latino	163.5	61.6	23	1.67	III
S1.1	Spray #1	Oxybenzone	47	98.06		30	Female	White	Not Hispanic or Latino	163.5	61.6	23	1.67	III
S1.1	Spray #1	Oxybenzone	52	78.85		30	Female	White	Not Hispanic or Latino	163.5	61.6	23	1.67	III
S1.1	Spray #1	Oxybenzone	57	138.4		30	Female	White	Not Hispanic or Latino	163.5	61.6	23	1.67	III
S1.1	Spray #1	Oxybenzone	71	96.28		30	Female	White	Not Hispanic or Latino	163.5	61.6	23	1.67	III
S1.1	Spray #1	Oxybenzone	73	109.27		30	Female	White	Not Hispanic or Latino	163.5	61.6	23	1.67	III
S1.1	Spray #1	Oxybenzone	74	59.55		30	Female	White	Not Hispanic or Latino	163.5	61.6	23	1.67	III
S1.1	Spray #1	Oxybenzone	76	181.36		30	Female	White	Not Hispanic or Latino	163.5	61.6	23	1.67	III
S1.1	Spray #1	Oxybenzone	78	532.02		30	Female	White	Not Hispanic or Latino	163.5	61.6	23	1.67	III
S1.1	Spray #1	Oxybenzone	81	243.24		30	Female	White	Not Hispanic or Latino	163.5	61.6	23	1.67	III
S1.1	Spray #1	Oxybenzone	82	266.6		30	Female	White	Not Hispanic or Latino	163.5	61.6	23	1.67	III
S1.1	Spray #1	Oxybenzone	84	212.82		30	Female	White	Not Hispanic or Latino	163.5	61.6	23	1.67	III
S1.1	Spray #1	Oxybenzone	86	257.15		30	Female	White	Not Hispanic or Latino	163.5	61.6	23	1.67	III
S1.1	Spray #1	Oxybenzone	95	145.76		30	Female	White	Not Hispanic or Latino	163.5	61.6	23	1.67	III
S1.1	Spray #1	Oxybenzone	120	61.8		30	Female	White	Not Hispanic or Latino	163.5	61.6	23	1.67	III
S1.1	Spray #1	Oxybenzone	144	53.88		30	Female	White	Not Hispanic or Latino	163.5	61.6	23	1.67	III
S1.2	Spray #1	Avobenzone	0	0	< 0.2	27	Male	Black or African American	Not Hispanic or Latino	174.5	61.2	20.1	1.72	VI
S1.2	Spray #1	Avobenzone	0.5	0	< 0.2	27	Male	Black or African American	Not Hispanic or Latino	174.5	61.2	20.1	1.72	VI
S1.2	Spray #1	Avobenzone	1	0	< 0.2	27	Male	Black or African American	Not Hispanic or Latino	174.5	61.2	20.1	1.72	VI
S1.2	Spray #1	Avobenzone	1.5	0	< 0.2	27	Male	Black or African American	Not Hispanic or Latino	174.5	61.2	20.1	1.72	VI
S1.2	Spray #1	Avobenzone	2	0	< 0.2	27	Male	Black or African American	Not Hispanic or Latino	174.5	61.2	20.1	1.72	VI
S1.2	Spray #1	Avobenzone	4	0	< 0.2	27	Male	Black or African American	Not Hispanic or Latino	174.5	61.2	20.1	1.72	VI
S1.2	Spray #1	Avobenzone	6	0.78		27	Male	Black or African American	Not Hispanic or Latino	174.5	61.2	20.1	1.72	VI
S1.2	Spray #1	Avobenzone	8	0.71		27	Male	Black or African American	Not Hispanic or Latino	174.5	61.2	20.1	1.72	VI
S1.2	Spray #1	Avobenzone	9	0.52		27	Male	Black or African American	Not Hispanic or Latino	174.5	61.2	20.1	1.72	VI
S1.2	Spray #1	Avobenzone	10	1.04		27	Male	Black or African American	Not Hispanic or Latino	174.5	61.2	20.1	1.72	VI
S1.2	Spray #1	Avobenzone	12	1.19		27	Male	Black or African American	Not Hispanic or Latino	174.5	61.2	20.1	1.72	VI
S1.2	Spray #1	Avobenzone	14	0.53		27	Male	Black or African American	Not Hispanic or Latino	174.5	61.2	20.1	1.72	VI
S1.2	Spray #1	Avobenzone	23	0.99		27	Male	Black or African American	Not Hispanic or Latino	174.5	61.2	20.1	1.72	VI
S1.2	Spray #1	Avobenzone	28	1		27	Male	Black or African American	Not Hispanic or Latino	174.5	61.2	20.1	1.72	VI
S1.2	Spray #1	Avobenzone	33	2.25		27	Male	Black or African American	Not Hispanic or Latino	174.5	61.2	20.1	1.72	VI
S1.2	Spray #1	Avobenzone	47	1.42		27	Male	Black or African American	Not Hispanic or Latino	174.5	61.2	20.1	1.72	VI
S1.2	Spray #1	Avobenzone	52	1.57		27	Male	Black or African American	Not Hispanic or Latino	174.5	61.2	20.1	1.72	VI
S1.2	Spray #1	Avobenzone	57	2.78		27	Male	Black or African American	Not Hispanic or Latino	174.5	61.2	20.1	1.72	VI
S1.2	Spray #1	Avobenzone	71	1.2		27	Male	Black or African American	Not Hispanic or Latino	174.5	61.2	20.1	1.72	VI
S1.2	Spray #1	Avobenzone	73	2.4		27	Male	Black or African American	Not Hispanic or Latino	174.5	61.2	20.1	1.72	VI
S1.2	Spray #1	Avobenzone	74	2.04		27	Male	Black or African American	Not Hispanic or Latino	174.5	61.2	20.1	1.72	VI
S1.2	Spray #1	Avobenzone	76	2.6		27	Male	Black or African American	Not Hispanic or Latino	174.5	61.2	20.1	1.72	VI
S1.2	Spray #1	Avobenzone	78	2.58		27	Male	Black or African American	Not Hispanic or Latino	174.5	61.2	20.1	1.72	VI
S1.2	Spray #1	Avobenzone	81	2.58		27	Male	Black or African American	Not Hispanic or Latino	174.5	61.2	20.1	1.72	VI
S1.2	Spray #1	Avobenzone	82	2.53		27	Male	Black or African American	Not Hispanic or Latino	174.5	61.2	20.1	1.72	VI
S1.2	Spray #1	Avobenzone	84	1.87		27	Male	Black or African American	Not Hispanic or Latino	174.5	61.2	20.1	1.72	VI
S1.2	Spray #1	Avobenzone	86	2.06		27	Male	Black or African American	Not Hispanic or Latino	174.5	61.2	20.1	1.72	VI
S1.2	Spray #1	Avobenzone	95	1.46		27	Male	Black or African American	Not Hispanic or Latino	174.5	61.2	20.1	1.72	VI
S1.2	Spray #1	Avobenzone	120	0.76		27	Male	Black or African American	Not Hispanic or Latino	174.5	61.2	20.1	1.72	VI
S1.2	Spray #1	Avobenzone	144	0.62		27	Male	Black or African American	Not Hispanic or Latino	174.5	61.2	20.1	1.72	VI
S1.2	Spray #1	Octocrylene	0	0	< 0.4	27	Male	Black or African American	Not Hispanic or Latino	174.5	61.2	20.1	1.72	VI
S1.2	Spray #1	Octocrylene	0.5	0	< 0.4	27	Male	Black or African American	Not Hispanic or Latino	174.5	61.2	20.1	1.72	VI
S1.2	Spray #1	Octocrylene	1	0	< 0.4	27	Male	Black or African American	Not Hispanic or Latino	174.5	61.2	20.1	1.72	VI
S1.2	Spray #1	Octocrylene	1.5	0	< 0.4	27	Male	Black or African American	Not Hispanic or Latino	174.5	61.2	20.1	1.72	VI
S1.2	Spray #1	Octocrylene	2	0	< 0.4	27	Male	Black or African American	Not Hispanic or Latino	174.5	61.2	20.1	1.72	VI
S1.2	Spray #1	Octocrylene	4	0	< 0.4	27	Male	Black or African American	Not Hispanic or Latino	174.5	61.2	20.1	1.72	VI
S1.2	Spray #1	Octocrylene	6	0	< 0.4	27	Male	Black or African American	Not Hispanic or Latino	174.5	61.2	20.1	1.72	VI
S1.2	Spray #1	Octocrylene	8	0	< 0.4	27	Male	Black or African American	Not Hispanic or Latino	174.5	61.2	20.1	1.72	VI
S1.2	Spray #1	Octocrylene	9	0	< 0.4	27	Male	Black or African American	Not Hispanic or Latino	174.5	61.2	20.1	1.72	VI
S1.2	Spray #1	Octocrylene	10	0.47		27	Male	Black or African American	Not Hispanic or Latino	174.5	61.2	20.1	1.72	VI
S1.2	Spray #1	Octocrylene	12	0.49		27	Male	Black or African American	Not Hispanic or Latino	174.5	61.2	20.1	1.72	VI
S1.2	Spray #1	Octocrylene	14	0.49		27	Male	Black or African American	Not Hispanic or Latino	174.5	61.2	20.1	1.72	VI
S1.2	Spray #1	Octocrylene	23	0.4		27	Male	Black or African American	Not Hispanic or Latino	174.5	61.2	20.1	1.72	VI
S1.2	Spray #1	Octocrylene	28	0.46		27	Male	Black or African American	Not Hispanic or Latino	174.5	61.2	20.1	1.72	VI
S1.2	Spray #1	Octocrylene	33	0.92		27	Male	Black or African American	Not Hispanic or Latino	174.5	61.2	20.1	1.72	VI
S1.2	Spray #1	Octocrylene	47	0.64		27	Male	Black or African American	Not Hispanic or Latino	174.5	61.2	20.1	1.72	VI
S1.2	Spray #1	Octocrylene	52	0.53		27	Male	Black or African American	Not Hispanic or Latino	174.5	61.2	20.1	1.72	VI
S1.2	Spray #1	Octocrylene	57	0.71		27	Male	Black or African American	Not Hispanic or Latino	174.5	61.2	20.1	1.72	VI
S1.2	Spray #1	Octocrylene	71	0.56		27	Male	Black or African American	Not Hispanic or Latino	174.5	61.2	20.1	1.72	VI
S1.2	Spray #1	Octocrylene	73	0.97		27	Male	Black or African American	Not Hispanic or Latino	174.5	61.2	20.1	1.72	VI
S1.2	Spray #1	Octocrylene	74	0.56		27	Male	Black or African American	Not Hispanic or Latino	174.5	61.2	20.1	1.72	VI
S1.2	Spray #1	Octocrylene	76	0.58		27	Male	Black or African American	Not Hispanic or Latino	174.5	61.2	20.1	1.72	VI
S1.2	Spray #1	Octocrylene	78	0.81		27	Male	Black or African American	Not Hispanic or Latino	174.5	61.2	20.1	1.72	VI
S1.2	Spray #1	Octocrylene	81	0.64		27	Male	Black or African American	Not Hispanic or Latino	174.5	61.2	20.1	1.72	VI
S1.2	Spray #1	Octocrylene	82	0.65		27	Male	Black or African American	Not Hispanic or Latino	174.5	61.2	20.1	1.72	VI
S1.2	Spray #1	Octocrylene	84	0.66		27	Male	Black or African American	Not Hispanic or Latino	174.5	61.2	20.1	1.72	VI
S1.2	Spray #1	Octocrylene	86	0.5		27	Male	Black or African American	Not Hispanic or Latino	174.5	61.2	20.1	1.72	VI
S1.2	Spray #1	Octocrylene	95	0.42		27	Male	Black or African American	Not Hispanic or Latino	174.5	61.2	20.1	1.72	VI
S1.2	Spray #1	Octocrylene	120	0.41		27	Male	Black or African American	Not Hispanic or Latino	174.5	61.2	20.1	1.72	VI
S1.2	Spray #1	Octocrylene	144	0.41		27	Male	Black or African American	Not Hispanic or Latino	174.5	61.2	20.1	1.72	VI
S1.2	Spray #1	Oxybenzone	0	0	< 0.4	27	Male	Black or African American	Not Hispanic or Latino	174.5	61.2	20.1	1.72	VI
S1.2	Spray #1	Oxybenzone	0.5	5.57		27	Male	Black or African American	Not Hispanic or Latino	174.5	61.2	20.1	1.72	VI
S1.2	Spray #1	Oxybenzone	1	10.28		27	Male	Black or African American	Not Hispanic or Latino	174.5	61.2	20.1	1.72	VI
S1.2	Spray #1	Oxybenzone	1.5	53.75		27	Male	Black or African American	Not Hispanic or Latino	174.5	61.2	20.1	1.72	VI
S1.2	Spray #1	Oxybenzone	2	31.63		27	Male	Black or African American	Not Hispanic or Latino	174.5	61.2	20.1	1.72	VI
S1.2	Spray #1	Oxybenzone	4	113.31		27	Male	Black or African American	Not Hispanic or Latino	174.5	61.2	20.1	1.72	VI
S1.2	Spray #1	Oxybenzone	6	87.19		27	Male	Black or African American	Not Hispanic or Latino	174.5	61.2	20.1	1.72	VI
S1.2	Spray #1	Oxybenzone	8	205.12		27	Male	Black or African American	Not Hispanic or Latino	174.5	61.2	20.1	1.72	VI
S1.2	Spray #1	Oxybenzone	9	52.32		27	Male	Black or African American	Not Hispanic or Latino	174.5	61.2	20.1	1.72	VI
S1.2	Spray #1	Oxybenzone	10	93.21		27	Male	Black or African American	Not Hispanic or Latino	174.5	61.2	20.1	1.72	VI
S1.2	Spray #1	Oxybenzone	12	110.36		27	Male	Black or African American	Not Hispanic or Latino	174.5	61.2	20.1	1.72	VI
S1.2	Spray #1	Oxybenzone	14	85.71		27	Male	Black or African American	Not Hispanic or Latino	174.5	61.2	20.1	1.72	VI
S1.2	Spray #1	Oxybenzone	23	35.54		27	Male	Black or African American	Not Hispanic or Latino	174.5	61.2	20.1	1.72	VI
S1.2	Spray #1	Oxybenzone	28	91.87		27	Male	Black or African American	Not Hispanic or Latino	174.5	61.2	20.1	1.72	VI
S1.2	Spray #1	Oxybenzone	33	109.39		27	Male	Black or African American	Not Hispanic or Latino	174.5	61.2	20.1	1.72	VI
S1.2	Spray #1	Oxybenzone	47	46.11		27	Male	Black or African American	Not Hispanic or Latino	174.5	61.2	20.1	1.72	VI
S1.2	Spray #1	Oxybenzone	52	66.91		27	Male	Black or African American	Not Hispanic or Latino	174.5	61.2	20.1	1.72	VI
S1.2	Spray #1	Oxybenzone	57	165.63		27	Male	Black or African American	Not Hispanic or Latino	174.5	61.2	20.1	1.72	VI
S1.2	Spray #1	Oxybenzone	71	51.99		27	Male	Black or African American	Not Hispanic or Latino	174.5	61.2	20.1	1.72	VI
S1.2	Spray #1	Oxybenzone	73	160.74		27	Male	Black or African American	Not Hispanic or Latino	174.5	61.2	20.1	1.72	VI
S1.2	Spray #1	Oxybenzone	74	80.79		27	Male	Black or African American	Not Hispanic or Latino	174.5	61.2	20.1	1.72	VI
S1.2	Spray #1	Oxybenzone	76	111.92		27	Male	Black or African American	Not Hispanic or Latino	174.5	61.2	20.1	1.72	VI
S1.2	Spray #1	Oxybenzone	78	109.18		27	Male	Black or African American	Not Hispanic or Latino	174.5	61.2	20.1	1.72	VI
S1.2	Spray #1	Oxybenzone	81	102.8		27	Male	Black or African American	Not Hispanic or Latino	174.5	61.2	20.1	1.72	VI
S1.2	Spray #1	Oxybenzone	82	102.86		27	Male	Black or African American	Not Hispanic or Latino	174.5	61.2	20.1	1.72	VI
S1.2	Spray #1	Oxybenzone	84	114.34		27	Male	Black or African American	Not Hispanic or Latino	174.5	61.2	20.1	1.72	VI
S1.2	Spray #1	Oxybenzone	86	146.84		27	Male	Black or African American	Not Hispanic or Latino	174.5	61.2	20.1	1.72	VI
S1.2	Spray #1	Oxybenzone	95	52.88		27	Male	Black or African American	Not Hispanic or Latino	174.5	61.2	20.1	1.72	VI
S1.2	Spray #1	Oxybenzone	120	28.77		27	Male	Black or African American	Not Hispanic or Latino	174.5	61.2	20.1	1.72	VI
S1.2	Spray #1	Oxybenzone	144	33.61		27	Male	Black or African American	Not Hispanic or Latino	174.5	61.2	20.1	1.72	VI
S1.3	Spray #1	Avobenzone	0	0	< 0.2	58	Male	White	Not Hispanic or Latino	176	67.4	21.8	1.82	II
S1.3	Spray #1	Avobenzone	0.5	0	< 0.2	58	Male	White	Not Hispanic or Latino	176	67.4	21.8	1.82	II
S1.3	Spray #1	Avobenzone	1	0	< 0.2	58	Male	White	Not Hispanic or Latino	176	67.4	21.8	1.82	II
S1.3	Spray #1	Avobenzone	1.5	0	< 0.2	58	Male	White	Not Hispanic or Latino	176	67.4	21.8	1.82	II
S1.3	Spray #1	Avobenzone	2	0	< 0.2	58	Male	White	Not Hispanic or Latino	176	67.4	21.8	1.82	II
S1.3	Spray #1	Avobenzone	4	0.7		58	Male	White	Not Hispanic or Latino	176	67.4	21.8	1.82	II
S1.3	Spray #1	Avobenzone	6	1.71		58	Male	White	Not Hispanic or Latino	176	67.4	21.8	1.82	II
S1.3	Spray #1	Avobenzone	8	1.93		58	Male	White	Not Hispanic or Latino	176	67.4	21.8	1.82	II
S1.3	Spray #1	Avobenzone	9	1.62		58	Male	White	Not Hispanic or Latino	176	67.4	21.8	1.82	II
S1.3	Spray #1	Avobenzone	10	1.51		58	Male	White	Not Hispanic or Latino	176	67.4	21.8	1.82	II
S1.3	Spray #1	Avobenzone	12	2.16		58	Male	White	Not Hispanic or Latino	176	67.4	21.8	1.82	II
S1.3	Spray #1	Avobenzone	14	1.22		58	Male	White	Not Hispanic or Latino	176	67.4	21.8	1.82	II
S1.3	Spray #1	Avobenzone	23	1.25		58	Male	White	Not Hispanic or Latino	176	67.4	21.8	1.82	II
S1.3	Spray #1	Avobenzone	28	5.17		58	Male	White	Not Hispanic or Latino	176	67.4	21.8	1.82	II
S1.3	Spray #1	Avobenzone	33	2.22		58	Male	White	Not Hispanic or Latino	176	67.4	21.8	1.82	II
S1.3	Spray #1	Avobenzone	47	1.38		58	Male	White	Not Hispanic or Latino	176	67.4	21.8	1.82	II
S1.3	Spray #1	Avobenzone	52	2.76		58	Male	White	Not Hispanic or Latino	176	67.4	21.8	1.82	II
S1.3	Spray #1	Avobenzone	57	2.59		58	Male	White	Not Hispanic or Latino	176	67.4	21.8	1.82	II
S1.3	Spray #1	Avobenzone	71	2.09		58	Male	White	Not Hispanic or Latino	176	67.4	21.8	1.82	II
S1.3	Spray #1	Avobenzone	73	2.22		58	Male	White	Not Hispanic or Latino	176	67.4	21.8	1.82	II
S1.3	Spray #1	Avobenzone	74	1.87		58	Male	White	Not Hispanic or Latino	176	67.4	21.8	1.82	II
S1.3	Spray #1	Avobenzone	76	2.44		58	Male	White	Not Hispanic or Latino	176	67.4	21.8	1.82	II
S1.3	Spray #1	Avobenzone	78	3.76		58	Male	White	Not Hispanic or Latino	176	67.4	21.8	1.82	II
S1.3	Spray #1	Avobenzone	81	5.23		58	Male	White	Not Hispanic or Latino	176	67.4	21.8	1.82	II
S1.3	Spray #1	Avobenzone	82	3.56		58	Male	White	Not Hispanic or Latino	176	67.4	21.8	1.82	II
S1.3	Spray #1	Avobenzone	84	1.92		58	Male	White	Not Hispanic or Latino	176	67.4	21.8	1.82	II
S1.3	Spray #1	Avobenzone	86	2.31		58	Male	White	Not Hispanic or Latino	176	67.4	21.8	1.82	II
S1.3	Spray #1	Avobenzone	95	1.86		58	Male	White	Not Hispanic or Latino	176	67.4	21.8	1.82	II
S1.3	Spray #1	Avobenzone	120	1.77		58	Male	White	Not Hispanic or Latino	176	67.4	21.8	1.82	II
S1.3	Spray #1	Avobenzone	144	1.21		58	Male	White	Not Hispanic or Latino	176	67.4	21.8	1.82	II
S1.3	Spray #1	Octocrylene	0	0	< 0.4	58	Male	White	Not Hispanic or Latino	176	67.4	21.8	1.82	II
S1.3	Spray #1	Octocrylene	0.5	0	< 0.4	58	Male	White	Not Hispanic or Latino	176	67.4	21.8	1.82	II
S1.3	Spray #1	Octocrylene	1	0	< 0.4	58	Male	White	Not Hispanic or Latino	176	67.4	21.8	1.82	II
S1.3	Spray #1	Octocrylene	1.5	0	< 0.4	58	Male	White	Not Hispanic or Latino	176	67.4	21.8	1.82	II
S1.3	Spray #1	Octocrylene	2	0	< 0.4	58	Male	White	Not Hispanic or Latino	176	67.4	21.8	1.82	II
S1.3	Spray #1	Octocrylene	4	0	< 0.4	58	Male	White	Not Hispanic or Latino	176	67.4	21.8	1.82	II
S1.3	Spray #1	Octocrylene	6	0.61		58	Male	White	Not Hispanic or Latino	176	67.4	21.8	1.82	II
S1.3	Spray #1	Octocrylene	8	0.82		58	Male	White	Not Hispanic or Latino	176	67.4	21.8	1.82	II
S1.3	Spray #1	Octocrylene	9	0.85		58	Male	White	Not Hispanic or Latino	176	67.4	21.8	1.82	II
S1.3	Spray #1	Octocrylene	10	0.5		58	Male	White	Not Hispanic or Latino	176	67.4	21.8	1.82	II
S1.3	Spray #1	Octocrylene	12	0.91		58	Male	White	Not Hispanic or Latino	176	67.4	21.8	1.82	II
S1.3	Spray #1	Octocrylene	14	0.73		58	Male	White	Not Hispanic or Latino	176	67.4	21.8	1.82	II
S1.3	Spray #1	Octocrylene	23	0.93		58	Male	White	Not Hispanic or Latino	176	67.4	21.8	1.82	II
S1.3	Spray #1	Octocrylene	28	4.98		58	Male	White	Not Hispanic or Latino	176	67.4	21.8	1.82	II
S1.3	Spray #1	Octocrylene	33	1.08		58	Male	White	Not Hispanic or Latino	176	67.4	21.8	1.82	II
S1.3	Spray #1	Octocrylene	47	1.03		58	Male	White	Not Hispanic or Latino	176	67.4	21.8	1.82	II
S1.3	Spray #1	Octocrylene	52	1.53		58	Male	White	Not Hispanic or Latino	176	67.4	21.8	1.82	II
S1.3	Spray #1	Octocrylene	57	1.19		58	Male	White	Not Hispanic or Latino	176	67.4	21.8	1.82	II
S1.3	Spray #1	Octocrylene	71	1.08		58	Male	White	Not Hispanic or Latino	176	67.4	21.8	1.82	II
S1.3	Spray #1	Octocrylene	73	1.3		58	Male	White	Not Hispanic or Latino	176	67.4	21.8	1.82	II
S1.3	Spray #1	Octocrylene	74	1.64		58	Male	White	Not Hispanic or Latino	176	67.4	21.8	1.82	II
S1.3	Spray #1	Octocrylene	76	1.56		58	Male	White	Not Hispanic or Latino	176	67.4	21.8	1.82	II
S1.3	Spray #1	Octocrylene	78	2.15		58	Male	White	Not Hispanic or Latino	176	67.4	21.8	1.82	II
S1.3	Spray #1	Octocrylene	81	4.22		58	Male	White	Not Hispanic or Latino	176	67.4	21.8	1.82	II
S1.3	Spray #1	Octocrylene	82	1.77		58	Male	White	Not Hispanic or Latino	176	67.4	21.8	1.82	II
S1.3	Spray #1	Octocrylene	84	1.05		58	Male	White	Not Hispanic or Latino	176	67.4	21.8	1.82	II
S1.3	Spray #1	Octocrylene	86	1.48		58	Male	White	Not Hispanic or Latino	176	67.4	21.8	1.82	II
S1.3	Spray #1	Octocrylene	95	1.06		58	Male	White	Not Hispanic or Latino	176	67.4	21.8	1.82	II
S1.3	Spray #1	Octocrylene	120	1.27		58	Male	White	Not Hispanic or Latino	176	67.4	21.8	1.82	II
S1.3	Spray #1	Octocrylene	144	0.7		58	Male	White	Not Hispanic or Latino	176	67.4	21.8	1.82	II
S1.3	Spray #1	Oxybenzone	0	0	< 0.4	58	Male	White	Not Hispanic or Latino	176	67.4	21.8	1.82	II
S1.3	Spray #1	Oxybenzone	0.5	21.29		58	Male	White	Not Hispanic or Latino	176	67.4	21.8	1.82	II
S1.3	Spray #1	Oxybenzone	1	51.96		58	Male	White	Not Hispanic or Latino	176	67.4	21.8	1.82	II
S1.3	Spray #1	Oxybenzone	1.5	109.4		58	Male	White	Not Hispanic or Latino	176	67.4	21.8	1.82	II
S1.3	Spray #1	Oxybenzone	2	126.59		58	Male	White	Not Hispanic or Latino	176	67.4	21.8	1.82	II
S1.3	Spray #1	Oxybenzone	4	171.54		58	Male	White	Not Hispanic or Latino	176	67.4	21.8	1.82	II
S1.3	Spray #1	Oxybenzone	6	210.46		58	Male	White	Not Hispanic or Latino	176	67.4	21.8	1.82	II
S1.3	Spray #1	Oxybenzone	8	194.66		58	Male	White	Not Hispanic or Latino	176	67.4	21.8	1.82	II
S1.3	Spray #1	Oxybenzone	9	162.52		58	Male	White	Not Hispanic or Latino	176	67.4	21.8	1.82	II
S1.3	Spray #1	Oxybenzone	10	146.62		58	Male	White	Not Hispanic or Latino	176	67.4	21.8	1.82	II
S1.3	Spray #1	Oxybenzone	12	271.13		58	Male	White	Not Hispanic or Latino	176	67.4	21.8	1.82	II
S1.3	Spray #1	Oxybenzone	14	143.21		58	Male	White	Not Hispanic or Latino	176	67.4	21.8	1.82	II
S1.3	Spray #1	Oxybenzone	23	152.38		58	Male	White	Not Hispanic or Latino	176	67.4	21.8	1.82	II
S1.3	Spray #1	Oxybenzone	28	119.17		58	Male	White	Not Hispanic or Latino	176	67.4	21.8	1.82	II
S1.3	Spray #1	Oxybenzone	33	171.83		58	Male	White	Not Hispanic or Latino	176	67.4	21.8	1.82	II
S1.3	Spray #1	Oxybenzone	47	119.89		58	Male	White	Not Hispanic or Latino	176	67.4	21.8	1.82	II
S1.3	Spray #1	Oxybenzone	52	189.07		58	Male	White	Not Hispanic or Latino	176	67.4	21.8	1.82	II
S1.3	Spray #1	Oxybenzone	57	147.53		58	Male	White	Not Hispanic or Latino	176	67.4	21.8	1.82	II
S1.3	Spray #1	Oxybenzone	71	114.91		58	Male	White	Not Hispanic or Latino	176	67.4	21.8	1.82	II
S1.3	Spray #1	Oxybenzone	73	158.92		58	Male	White	Not Hispanic or Latino	176	67.4	21.8	1.82	II
S1.3	Spray #1	Oxybenzone	74	106.84		58	Male	White	Not Hispanic or Latino	176	67.4	21.8	1.82	II
S1.3	Spray #1	Oxybenzone	76	175.29		58	Male	White	Not Hispanic or Latino	176	67.4	21.8	1.82	II
S1.3	Spray #1	Oxybenzone	78	205.26		58	Male	White	Not Hispanic or Latino	176	67.4	21.8	1.82	II
S1.3	Spray #1	Oxybenzone	81	150.06		58	Male	White	Not Hispanic or Latino	176	67.4	21.8	1.82	II
S1.3	Spray #1	Oxybenzone	82	161.98		58	Male	White	Not Hispanic or Latino	176	67.4	21.8	1.82	II
S1.3	Spray #1	Oxybenzone	84	147.61		58	Male	White	Not Hispanic or Latino	176	67.4	21.8	1.82	II
S1.3	Spray #1	Oxybenzone	86	197.77		58	Male	White	Not Hispanic or Latino	176	67.4	21.8	1.82	II
S1.3	Spray #1	Oxybenzone	95	115.07		58	Male	White	Not Hispanic or Latino	176	67.4	21.8	1.82	II
S1.3	Spray #1	Oxybenzone	120	113.36		58	Male	White	Not Hispanic or Latino	176	67.4	21.8	1.82	II
S1.3	Spray #1	Oxybenzone	144	56.09		58	Male	White	Not Hispanic or Latino	176	67.4	21.8	1.82	II
S1.4	Spray #1	Avobenzone	0	0	< 0.2	47	Female	White	Hispanic or Latino	164.5	73.4	27.1	1.83	III
S1.4	Spray #1	Avobenzone	0.5	0	< 0.2	47	Female	White	Hispanic or Latino	164.5	73.4	27.1	1.83	III
S1.4	Spray #1	Avobenzone	1	0	< 0.2	47	Female	White	Hispanic or Latino	164.5	73.4	27.1	1.83	III
S1.4	Spray #1	Avobenzone	1.5	0	< 0.2	47	Female	White	Hispanic or Latino	164.5	73.4	27.1	1.83	III
S1.4	Spray #1	Avobenzone	2	0	< 0.2	47	Female	White	Hispanic or Latino	164.5	73.4	27.1	1.83	III
S1.4	Spray #1	Avobenzone	4	0	< 0.2	47	Female	White	Hispanic or Latino	164.5	73.4	27.1	1.83	III
S1.4	Spray #1	Avobenzone	6	0.28		47	Female	White	Hispanic or Latino	164.5	73.4	27.1	1.83	III
S1.4	Spray #1	Avobenzone	8	1.24		47	Female	White	Hispanic or Latino	164.5	73.4	27.1	1.83	III
S1.4	Spray #1	Avobenzone	9	0.79		47	Female	White	Hispanic or Latino	164.5	73.4	27.1	1.83	III
S1.4	Spray #1	Avobenzone	10	0.49		47	Female	White	Hispanic or Latino	164.5	73.4	27.1	1.83	III
S1.4	Spray #1	Avobenzone	12	0.44		47	Female	White	Hispanic or Latino	164.5	73.4	27.1	1.83	III
S1.4	Spray #1	Avobenzone	14	0.78		47	Female	White	Hispanic or Latino	164.5	73.4	27.1	1.83	III
S1.4	Spray #1	Avobenzone	23	0.5		47	Female	White	Hispanic or Latino	164.5	73.4	27.1	1.83	III
S1.4	Spray #1	Avobenzone	28	0.77		47	Female	White	Hispanic or Latino	164.5	73.4	27.1	1.83	III
S1.4	Spray #1	Avobenzone	33	0.87		47	Female	White	Hispanic or Latino	164.5	73.4	27.1	1.83	III
S1.4	Spray #1	Avobenzone	47	0.96		47	Female	White	Hispanic or Latino	164.5	73.4	27.1	1.83	III
S1.4	Spray #1	Avobenzone	52	1.08		47	Female	White	Hispanic or Latino	164.5	73.4	27.1	1.83	III
S1.4	Spray #1	Avobenzone	57	1.64		47	Female	White	Hispanic or Latino	164.5	73.4	27.1	1.83	III
S1.4	Spray #1	Avobenzone	71	0.64		47	Female	White	Hispanic or Latino	164.5	73.4	27.1	1.83	III
S1.4	Spray #1	Avobenzone	73	0.96		47	Female	White	Hispanic or Latino	164.5	73.4	27.1	1.83	III
S1.4	Spray #1	Avobenzone	74	0.96		47	Female	White	Hispanic or Latino	164.5	73.4	27.1	1.83	III
S1.4	Spray #1	Avobenzone	76	0.86		47	Female	White	Hispanic or Latino	164.5	73.4	27.1	1.83	III
S1.4	Spray #1	Avobenzone	78	0.87		47	Female	White	Hispanic or Latino	164.5	73.4	27.1	1.83	III
S1.4	Spray #1	Avobenzone	81	1.05		47	Female	White	Hispanic or Latino	164.5	73.4	27.1	1.83	III
S1.4	Spray #1	Avobenzone	82	0.85		47	Female	White	Hispanic or Latino	164.5	73.4	27.1	1.83	III
S1.4	Spray #1	Avobenzone	84	0.86		47	Female	White	Hispanic or Latino	164.5	73.4	27.1	1.83	III
S1.4	Spray #1	Avobenzone	86	1.39		47	Female	White	Hispanic or Latino	164.5	73.4	27.1	1.83	III
S1.4	Spray #1	Avobenzone	95	0.92		47	Female	White	Hispanic or Latino	164.5	73.4	27.1	1.83	III
S1.4	Spray #1	Avobenzone	120	0.54		47	Female	White	Hispanic or Latino	164.5	73.4	27.1	1.83	III
S1.4	Spray #1	Avobenzone	144	0.37		47	Female	White	Hispanic or Latino	164.5	73.4	27.1	1.83	III
S1.4	Spray #1	Octocrylene	0	0	< 0.4	47	Female	White	Hispanic or Latino	164.5	73.4	27.1	1.83	III
S1.4	Spray #1	Octocrylene	0.5	0	< 0.4	47	Female	White	Hispanic or Latino	164.5	73.4	27.1	1.83	III
S1.4	Spray #1	Octocrylene	1	0	< 0.4	47	Female	White	Hispanic or Latino	164.5	73.4	27.1	1.83	III
S1.4	Spray #1	Octocrylene	1.5	0	< 0.4	47	Female	White	Hispanic or Latino	164.5	73.4	27.1	1.83	III
S1.4	Spray #1	Octocrylene	2	0	< 0.4	47	Female	White	Hispanic or Latino	164.5	73.4	27.1	1.83	III
S1.4	Spray #1	Octocrylene	4	0	< 0.4	47	Female	White	Hispanic or Latino	164.5	73.4	27.1	1.83	III
S1.4	Spray #1	Octocrylene	6	0	< 0.4	47	Female	White	Hispanic or Latino	164.5	73.4	27.1	1.83	III
S1.4	Spray #1	Octocrylene	8	1.67		47	Female	White	Hispanic or Latino	164.5	73.4	27.1	1.83	III
S1.4	Spray #1	Octocrylene	9	0.68		47	Female	White	Hispanic or Latino	164.5	73.4	27.1	1.83	III
S1.4	Spray #1	Octocrylene	10	0	< 0.4	47	Female	White	Hispanic or Latino	164.5	73.4	27.1	1.83	III
S1.4	Spray #1	Octocrylene	12	0.43		47	Female	White	Hispanic or Latino	164.5	73.4	27.1	1.83	III
S1.4	Spray #1	Octocrylene	14	0.61		47	Female	White	Hispanic or Latino	164.5	73.4	27.1	1.83	III
S1.4	Spray #1	Octocrylene	23	0.41		47	Female	White	Hispanic or Latino	164.5	73.4	27.1	1.83	III
S1.4	Spray #1	Octocrylene	28	0.49		47	Female	White	Hispanic or Latino	164.5	73.4	27.1	1.83	III
S1.4	Spray #1	Octocrylene	33	0.61		47	Female	White	Hispanic or Latino	164.5	73.4	27.1	1.83	III
S1.4	Spray #1	Octocrylene	47	0.72		47	Female	White	Hispanic or Latino	164.5	73.4	27.1	1.83	III
S1.4	Spray #1	Octocrylene	52	0.68		47	Female	White	Hispanic or Latino	164.5	73.4	27.1	1.83	III
S1.4	Spray #1	Octocrylene	57	1.1		47	Female	White	Hispanic or Latino	164.5	73.4	27.1	1.83	III
S1.4	Spray #1	Octocrylene	71	0.61		47	Female	White	Hispanic or Latino	164.5	73.4	27.1	1.83	III
S1.4	Spray #1	Octocrylene	73	0.79		47	Female	White	Hispanic or Latino	164.5	73.4	27.1	1.83	III
S1.4	Spray #1	Octocrylene	74	0.76		47	Female	White	Hispanic or Latino	164.5	73.4	27.1	1.83	III
S1.4	Spray #1	Octocrylene	76	0.71		47	Female	White	Hispanic or Latino	164.5	73.4	27.1	1.83	III
S1.4	Spray #1	Octocrylene	78	0.64		47	Female	White	Hispanic or Latino	164.5	73.4	27.1	1.83	III
S1.4	Spray #1	Octocrylene	81	0.81		47	Female	White	Hispanic or Latino	164.5	73.4	27.1	1.83	III
S1.4	Spray #1	Octocrylene	82	0.68		47	Female	White	Hispanic or Latino	164.5	73.4	27.1	1.83	III
S1.4	Spray #1	Octocrylene	84	0.63		47	Female	White	Hispanic or Latino	164.5	73.4	27.1	1.83	III
S1.4	Spray #1	Octocrylene	86	1.16		47	Female	White	Hispanic or Latino	164.5	73.4	27.1	1.83	III
S1.4	Spray #1	Octocrylene	95	0.78		47	Female	White	Hispanic or Latino	164.5	73.4	27.1	1.83	III
S1.4	Spray #1	Octocrylene	120	0.57		47	Female	White	Hispanic or Latino	164.5	73.4	27.1	1.83	III
S1.4	Spray #1	Octocrylene	144	0.44		47	Female	White	Hispanic or Latino	164.5	73.4	27.1	1.83	III
S1.4	Spray #1	Oxybenzone	0	0	< 0.4	47	Female	White	Hispanic or Latino	164.5	73.4	27.1	1.83	III
S1.4	Spray #1	Oxybenzone	0.5	1.07		47	Female	White	Hispanic or Latino	164.5	73.4	27.1	1.83	III
S1.4	Spray #1	Oxybenzone	1	7.29		47	Female	White	Hispanic or Latino	164.5	73.4	27.1	1.83	III
S1.4	Spray #1	Oxybenzone	1.5	23.57		47	Female	White	Hispanic or Latino	164.5	73.4	27.1	1.83	III
S1.4	Spray #1	Oxybenzone	2	45.4		47	Female	White	Hispanic or Latino	164.5	73.4	27.1	1.83	III
S1.4	Spray #1	Oxybenzone	4	43.82		47	Female	White	Hispanic or Latino	164.5	73.4	27.1	1.83	III
S1.4	Spray #1	Oxybenzone	6	50.8		47	Female	White	Hispanic or Latino	164.5	73.4	27.1	1.83	III
S1.4	Spray #1	Oxybenzone	8	60.01		47	Female	White	Hispanic or Latino	164.5	73.4	27.1	1.83	III
S1.4	Spray #1	Oxybenzone	9	70.57		47	Female	White	Hispanic or Latino	164.5	73.4	27.1	1.83	III
S1.4	Spray #1	Oxybenzone	10	65.16		47	Female	White	Hispanic or Latino	164.5	73.4	27.1	1.83	III
S1.4	Spray #1	Oxybenzone	12	70.87		47	Female	White	Hispanic or Latino	164.5	73.4	27.1	1.83	III
S1.4	Spray #1	Oxybenzone	14	59.23		47	Female	White	Hispanic or Latino	164.5	73.4	27.1	1.83	III
S1.4	Spray #1	Oxybenzone	23	31.22		47	Female	White	Hispanic or Latino	164.5	73.4	27.1	1.83	III
S1.4	Spray #1	Oxybenzone	28	49.45		47	Female	White	Hispanic or Latino	164.5	73.4	27.1	1.83	III
S1.4	Spray #1	Oxybenzone	33	73.23		47	Female	White	Hispanic or Latino	164.5	73.4	27.1	1.83	III
S1.4	Spray #1	Oxybenzone	47	56.62		47	Female	White	Hispanic or Latino	164.5	73.4	27.1	1.83	III
S1.4	Spray #1	Oxybenzone	52	62.67		47	Female	White	Hispanic or Latino	164.5	73.4	27.1	1.83	III
S1.4	Spray #1	Oxybenzone	57	83.32		47	Female	White	Hispanic or Latino	164.5	73.4	27.1	1.83	III
S1.4	Spray #1	Oxybenzone	71	40.11		47	Female	White	Hispanic or Latino	164.5	73.4	27.1	1.83	III
S1.4	Spray #1	Oxybenzone	73	47.63		47	Female	White	Hispanic or Latino	164.5	73.4	27.1	1.83	III
S1.4	Spray #1	Oxybenzone	74	49.49		47	Female	White	Hispanic or Latino	164.5	73.4	27.1	1.83	III
S1.4	Spray #1	Oxybenzone	76	65.46		47	Female	White	Hispanic or Latino	164.5	73.4	27.1	1.83	III
S1.4	Spray #1	Oxybenzone	78	60.58		47	Female	White	Hispanic or Latino	164.5	73.4	27.1	1.83	III
S1.4	Spray #1	Oxybenzone	81	61.68		47	Female	White	Hispanic or Latino	164.5	73.4	27.1	1.83	III
S1.4	Spray #1	Oxybenzone	82	51.92		47	Female	White	Hispanic or Latino	164.5	73.4	27.1	1.83	III
S1.4	Spray #1	Oxybenzone	84	63.25		47	Female	White	Hispanic or Latino	164.5	73.4	27.1	1.83	III
S1.4	Spray #1	Oxybenzone	86	75.22		47	Female	White	Hispanic or Latino	164.5	73.4	27.1	1.83	III
S1.4	Spray #1	Oxybenzone	95	38.5		47	Female	White	Hispanic or Latino	164.5	73.4	27.1	1.83	III
S1.4	Spray #1	Oxybenzone	120	18.01		47	Female	White	Hispanic or Latino	164.5	73.4	27.1	1.83	III
S1.4	Spray #1	Oxybenzone	144	15.62		47	Female	White	Hispanic or Latino	164.5	73.4	27.1	1.83	III
S1.5	Spray #1	Avobenzone	0	0	< 0.2	56	Female	White	Not Hispanic or Latino	176.5	74.2	23.8	1.91	III
S1.5	Spray #1	Avobenzone	0.5	0	< 0.2	56	Female	White	Not Hispanic or Latino	176.5	74.2	23.8	1.91	III
S1.5	Spray #1	Avobenzone	1	0	< 0.2	56	Female	White	Not Hispanic or Latino	176.5	74.2	23.8	1.91	III
S1.5	Spray #1	Avobenzone	1.5	0	< 0.2	56	Female	White	Not Hispanic or Latino	176.5	74.2	23.8	1.91	III
S1.5	Spray #1	Avobenzone	2	0	< 0.2	56	Female	White	Not Hispanic or Latino	176.5	74.2	23.8	1.91	III
S1.5	Spray #1	Avobenzone	4	0	< 0.2	56	Female	White	Not Hispanic or Latino	176.5	74.2	23.8	1.91	III
S1.5	Spray #1	Avobenzone	6	0.28		56	Female	White	Not Hispanic or Latino	176.5	74.2	23.8	1.91	III
S1.5	Spray #1	Avobenzone	8	0.73		56	Female	White	Not Hispanic or Latino	176.5	74.2	23.8	1.91	III
S1.5	Spray #1	Avobenzone	9	0.67		56	Female	White	Not Hispanic or Latino	176.5	74.2	23.8	1.91	III
S1.5	Spray #1	Avobenzone	10	0.56		56	Female	White	Not Hispanic or Latino	176.5	74.2	23.8	1.91	III
S1.5	Spray #1	Avobenzone	12	0.6		56	Female	White	Not Hispanic or Latino	176.5	74.2	23.8	1.91	III
S1.5	Spray #1	Avobenzone	14	1.04		56	Female	White	Not Hispanic or Latino	176.5	74.2	23.8	1.91	III
S1.5	Spray #1	Avobenzone	23	0.9		56	Female	White	Not Hispanic or Latino	176.5	74.2	23.8	1.91	III
S1.5	Spray #1	Avobenzone	28	1.03		56	Female	White	Not Hispanic or Latino	176.5	74.2	23.8	1.91	III
S1.5	Spray #1	Avobenzone	33	2.69		56	Female	White	Not Hispanic or Latino	176.5	74.2	23.8	1.91	III
S1.5	Spray #1	Avobenzone	47	2.17		56	Female	White	Not Hispanic or Latino	176.5	74.2	23.8	1.91	III
S1.5	Spray #1	Avobenzone	52	2.18		56	Female	White	Not Hispanic or Latino	176.5	74.2	23.8	1.91	III
S1.5	Spray #1	Avobenzone	57	2.27		56	Female	White	Not Hispanic or Latino	176.5	74.2	23.8	1.91	III
S1.5	Spray #1	Avobenzone	71	1.81		56	Female	White	Not Hispanic or Latino	176.5	74.2	23.8	1.91	III
S1.5	Spray #1	Avobenzone	73	2.2		56	Female	White	Not Hispanic or Latino	176.5	74.2	23.8	1.91	III
S1.5	Spray #1	Avobenzone	74	2.8		56	Female	White	Not Hispanic or Latino	176.5	74.2	23.8	1.91	III
S1.5	Spray #1	Avobenzone	76	4.13		56	Female	White	Not Hispanic or Latino	176.5	74.2	23.8	1.91	III
S1.5	Spray #1	Avobenzone	78	1.96		56	Female	White	Not Hispanic or Latino	176.5	74.2	23.8	1.91	III
S1.5	Spray #1	Avobenzone	81	2.61		56	Female	White	Not Hispanic or Latino	176.5	74.2	23.8	1.91	III
S1.5	Spray #1	Avobenzone	82	2.29		56	Female	White	Not Hispanic or Latino	176.5	74.2	23.8	1.91	III
S1.5	Spray #1	Avobenzone	84	1.91		56	Female	White	Not Hispanic or Latino	176.5	74.2	23.8	1.91	III
S1.5	Spray #1	Avobenzone	86	1.78		56	Female	White	Not Hispanic or Latino	176.5	74.2	23.8	1.91	III
S1.5	Spray #1	Avobenzone	95	1.7		56	Female	White	Not Hispanic or Latino	176.5	74.2	23.8	1.91	III
S1.5	Spray #1	Avobenzone	120	1.52		56	Female	White	Not Hispanic or Latino	176.5	74.2	23.8	1.91	III
S1.5	Spray #1	Avobenzone	144	1.24		56	Female	White	Not Hispanic or Latino	176.5	74.2	23.8	1.91	III
S1.5	Spray #1	Octocrylene	0	0	< 0.4	56	Female	White	Not Hispanic or Latino	176.5	74.2	23.8	1.91	III
S1.5	Spray #1	Octocrylene	0.5	0	< 0.4	56	Female	White	Not Hispanic or Latino	176.5	74.2	23.8	1.91	III
S1.5	Spray #1	Octocrylene	1	0	< 0.4	56	Female	White	Not Hispanic or Latino	176.5	74.2	23.8	1.91	III
S1.5	Spray #1	Octocrylene	1.5	0	< 0.4	56	Female	White	Not Hispanic or Latino	176.5	74.2	23.8	1.91	III
S1.5	Spray #1	Octocrylene	2	0	< 0.4	56	Female	White	Not Hispanic or Latino	176.5	74.2	23.8	1.91	III
S1.5	Spray #1	Octocrylene	4	0	< 0.4	56	Female	White	Not Hispanic or Latino	176.5	74.2	23.8	1.91	III
S1.5	Spray #1	Octocrylene	6	0	< 0.4	56	Female	White	Not Hispanic or Latino	176.5	74.2	23.8	1.91	III
S1.5	Spray #1	Octocrylene	8	0	< 0.4	56	Female	White	Not Hispanic or Latino	176.5	74.2	23.8	1.91	III
S1.5	Spray #1	Octocrylene	9	0	< 0.4	56	Female	White	Not Hispanic or Latino	176.5	74.2	23.8	1.91	III
S1.5	Spray #1	Octocrylene	10	0	< 0.4	56	Female	White	Not Hispanic or Latino	176.5	74.2	23.8	1.91	III
S1.5	Spray #1	Octocrylene	12	0	< 0.4	56	Female	White	Not Hispanic or Latino	176.5	74.2	23.8	1.91	III
S1.5	Spray #1	Octocrylene	14	0.46		56	Female	White	Not Hispanic or Latino	176.5	74.2	23.8	1.91	III
S1.5	Spray #1	Octocrylene	23	0.41		56	Female	White	Not Hispanic or Latino	176.5	74.2	23.8	1.91	III
S1.5	Spray #1	Octocrylene	28	0.44		56	Female	White	Not Hispanic or Latino	176.5	74.2	23.8	1.91	III
S1.5	Spray #1	Octocrylene	33	0.88		56	Female	White	Not Hispanic or Latino	176.5	74.2	23.8	1.91	III
S1.5	Spray #1	Octocrylene	47	0.91		56	Female	White	Not Hispanic or Latino	176.5	74.2	23.8	1.91	III
S1.5	Spray #1	Octocrylene	52	0.8		56	Female	White	Not Hispanic or Latino	176.5	74.2	23.8	1.91	III
S1.5	Spray #1	Octocrylene	57	0.88		56	Female	White	Not Hispanic or Latino	176.5	74.2	23.8	1.91	III
S1.5	Spray #1	Octocrylene	71	0.76		56	Female	White	Not Hispanic or Latino	176.5	74.2	23.8	1.91	III
S1.5	Spray #1	Octocrylene	73	0.82		56	Female	White	Not Hispanic or Latino	176.5	74.2	23.8	1.91	III
S1.5	Spray #1	Octocrylene	74	1.4		56	Female	White	Not Hispanic or Latino	176.5	74.2	23.8	1.91	III
S1.5	Spray #1	Octocrylene	76	1.85		56	Female	White	Not Hispanic or Latino	176.5	74.2	23.8	1.91	III
S1.5	Spray #1	Octocrylene	78	1.21		56	Female	White	Not Hispanic or Latino	176.5	74.2	23.8	1.91	III
S1.5	Spray #1	Octocrylene	81	1.06		56	Female	White	Not Hispanic or Latino	176.5	74.2	23.8	1.91	III
S1.5	Spray #1	Octocrylene	82	0.9		56	Female	White	Not Hispanic or Latino	176.5	74.2	23.8	1.91	III
S1.5	Spray #1	Octocrylene	84	0.99		56	Female	White	Not Hispanic or Latino	176.5	74.2	23.8	1.91	III
S1.5	Spray #1	Octocrylene	86	0.75		56	Female	White	Not Hispanic or Latino	176.5	74.2	23.8	1.91	III
S1.5	Spray #1	Octocrylene	95	0.77		56	Female	White	Not Hispanic or Latino	176.5	74.2	23.8	1.91	III
S1.5	Spray #1	Octocrylene	120	0.71		56	Female	White	Not Hispanic or Latino	176.5	74.2	23.8	1.91	III
S1.5	Spray #1	Octocrylene	144	0.58		56	Female	White	Not Hispanic or Latino	176.5	74.2	23.8	1.91	III
S1.5	Spray #1	Oxybenzone	0	0	< 0.4	56	Female	White	Not Hispanic or Latino	176.5	74.2	23.8	1.91	III
S1.5	Spray #1	Oxybenzone	0.5	1.98		56	Female	White	Not Hispanic or Latino	176.5	74.2	23.8	1.91	III
S1.5	Spray #1	Oxybenzone	1	3.87		56	Female	White	Not Hispanic or Latino	176.5	74.2	23.8	1.91	III
S1.5	Spray #1	Oxybenzone	1.5	5.76		56	Female	White	Not Hispanic or Latino	176.5	74.2	23.8	1.91	III
S1.5	Spray #1	Oxybenzone	2	17.43		56	Female	White	Not Hispanic or Latino	176.5	74.2	23.8	1.91	III
S1.5	Spray #1	Oxybenzone	4	48.43		56	Female	White	Not Hispanic or Latino	176.5	74.2	23.8	1.91	III
S1.5	Spray #1	Oxybenzone	6	51.33		56	Female	White	Not Hispanic or Latino	176.5	74.2	23.8	1.91	III
S1.5	Spray #1	Oxybenzone	8	108.07		56	Female	White	Not Hispanic or Latino	176.5	74.2	23.8	1.91	III
S1.5	Spray #1	Oxybenzone	9	73.95		56	Female	White	Not Hispanic or Latino	176.5	74.2	23.8	1.91	III
S1.5	Spray #1	Oxybenzone	10	78.61		56	Female	White	Not Hispanic or Latino	176.5	74.2	23.8	1.91	III
S1.5	Spray #1	Oxybenzone	12	62.55		56	Female	White	Not Hispanic or Latino	176.5	74.2	23.8	1.91	III
S1.5	Spray #1	Oxybenzone	14	73.88		56	Female	White	Not Hispanic or Latino	176.5	74.2	23.8	1.91	III
S1.5	Spray #1	Oxybenzone	23	46.17		56	Female	White	Not Hispanic or Latino	176.5	74.2	23.8	1.91	III
S1.5	Spray #1	Oxybenzone	28	48.42		56	Female	White	Not Hispanic or Latino	176.5	74.2	23.8	1.91	III
S1.5	Spray #1	Oxybenzone	33	75.37		56	Female	White	Not Hispanic or Latino	176.5	74.2	23.8	1.91	III
S1.5	Spray #1	Oxybenzone	47	137.63		56	Female	White	Not Hispanic or Latino	176.5	74.2	23.8	1.91	III
S1.5	Spray #1	Oxybenzone	52	114.41		56	Female	White	Not Hispanic or Latino	176.5	74.2	23.8	1.91	III
S1.5	Spray #1	Oxybenzone	57	116.28		56	Female	White	Not Hispanic or Latino	176.5	74.2	23.8	1.91	III
S1.5	Spray #1	Oxybenzone	71	84.25		56	Female	White	Not Hispanic or Latino	176.5	74.2	23.8	1.91	III
S1.5	Spray #1	Oxybenzone	73	129.35		56	Female	White	Not Hispanic or Latino	176.5	74.2	23.8	1.91	III
S1.5	Spray #1	Oxybenzone	74	123.09		56	Female	White	Not Hispanic or Latino	176.5	74.2	23.8	1.91	III
S1.5	Spray #1	Oxybenzone	76	164.08		56	Female	White	Not Hispanic or Latino	176.5	74.2	23.8	1.91	III
S1.5	Spray #1	Oxybenzone	78	70.88		56	Female	White	Not Hispanic or Latino	176.5	74.2	23.8	1.91	III
S1.5	Spray #1	Oxybenzone	81	121.25		56	Female	White	Not Hispanic or Latino	176.5	74.2	23.8	1.91	III
S1.5	Spray #1	Oxybenzone	82	117.39		56	Female	White	Not Hispanic or Latino	176.5	74.2	23.8	1.91	III
S1.5	Spray #1	Oxybenzone	84	90.18		56	Female	White	Not Hispanic or Latino	176.5	74.2	23.8	1.91	III
S1.5	Spray #1	Oxybenzone	86	111.45		56	Female	White	Not Hispanic or Latino	176.5	74.2	23.8	1.91	III
S1.5	Spray #1	Oxybenzone	95	101.27		56	Female	White	Not Hispanic or Latino	176.5	74.2	23.8	1.91	III
S1.5	Spray #1	Oxybenzone	120	33.48		56	Female	White	Not Hispanic or Latino	176.5	74.2	23.8	1.91	III
S1.5	Spray #1	Oxybenzone	144	25.9		56	Female	White	Not Hispanic or Latino	176.5	74.2	23.8	1.91	III
S1.6	Spray #1	Avobenzone	0	0	< 0.2	39	Male	White	Hispanic or Latino	175	87.6	28.6	2.06	V
S1.6	Spray #1	Avobenzone	0.5	0	< 0.2	39	Male	White	Hispanic or Latino	175	87.6	28.6	2.06	V
S1.6	Spray #1	Avobenzone	1	0	< 0.2	39	Male	White	Hispanic or Latino	175	87.6	28.6	2.06	V
S1.6	Spray #1	Avobenzone	1.5	0	< 0.2	39	Male	White	Hispanic or Latino	175	87.6	28.6	2.06	V
S1.6	Spray #1	Avobenzone	2	0	< 0.2	39	Male	White	Hispanic or Latino	175	87.6	28.6	2.06	V
S1.6	Spray #1	Avobenzone	4	0.2		39	Male	White	Hispanic or Latino	175	87.6	28.6	2.06	V
S1.6	Spray #1	Avobenzone	6	2.39		39	Male	White	Hispanic or Latino	175	87.6	28.6	2.06	V
S1.6	Spray #1	Avobenzone	8	3.05		39	Male	White	Hispanic or Latino	175	87.6	28.6	2.06	V
S1.6	Spray #1	Avobenzone	9	1.69		39	Male	White	Hispanic or Latino	175	87.6	28.6	2.06	V
S1.6	Spray #1	Avobenzone	10	1.08		39	Male	White	Hispanic or Latino	175	87.6	28.6	2.06	V
S1.6	Spray #1	Avobenzone	12	1.07		39	Male	White	Hispanic or Latino	175	87.6	28.6	2.06	V
S1.6	Spray #1	Avobenzone	14	1.17		39	Male	White	Hispanic or Latino	175	87.6	28.6	2.06	V
S1.6	Spray #1	Avobenzone	23	1.46		39	Male	White	Hispanic or Latino	175	87.6	28.6	2.06	V
S1.6	Spray #1	Avobenzone	28	1.08		39	Male	White	Hispanic or Latino	175	87.6	28.6	2.06	V
S1.6	Spray #1	Avobenzone	33	4.48		39	Male	White	Hispanic or Latino	175	87.6	28.6	2.06	V
S1.6	Spray #1	Avobenzone	47	2.08		39	Male	White	Hispanic or Latino	175	87.6	28.6	2.06	V
S1.6	Spray #1	Avobenzone	52	2.02		39	Male	White	Hispanic or Latino	175	87.6	28.6	2.06	V
S1.6	Spray #1	Avobenzone	57	3.98		39	Male	White	Hispanic or Latino	175	87.6	28.6	2.06	V
S1.6	Spray #1	Avobenzone	71	3.21		39	Male	White	Hispanic or Latino	175	87.6	28.6	2.06	V
S1.6	Spray #1	Avobenzone	73	2.77		39	Male	White	Hispanic or Latino	175	87.6	28.6	2.06	V
S1.6	Spray #1	Avobenzone	74	2.39		39	Male	White	Hispanic or Latino	175	87.6	28.6	2.06	V
S1.6	Spray #1	Avobenzone	76	2.2		39	Male	White	Hispanic or Latino	175	87.6	28.6	2.06	V
S1.6	Spray #1	Avobenzone	78	5.41		39	Male	White	Hispanic or Latino	175	87.6	28.6	2.06	V
S1.6	Spray #1	Avobenzone	81	2.25		39	Male	White	Hispanic or Latino	175	87.6	28.6	2.06	V
S1.6	Spray #1	Avobenzone	82	8.32		39	Male	White	Hispanic or Latino	175	87.6	28.6	2.06	V
S1.6	Spray #1	Avobenzone	84	2.23		39	Male	White	Hispanic or Latino	175	87.6	28.6	2.06	V
S1.6	Spray #1	Avobenzone	86	1.33		39	Male	White	Hispanic or Latino	175	87.6	28.6	2.06	V
S1.6	Spray #1	Avobenzone	95	1.99		39	Male	White	Hispanic or Latino	175	87.6	28.6	2.06	V
S1.6	Spray #1	Avobenzone	120	2.69		39	Male	White	Hispanic or Latino	175	87.6	28.6	2.06	V
S1.6	Spray #1	Avobenzone	144	1.2		39	Male	White	Hispanic or Latino	175	87.6	28.6	2.06	V
S1.6	Spray #1	Octocrylene	0	0	< 0.4	39	Male	White	Hispanic or Latino	175	87.6	28.6	2.06	V
S1.6	Spray #1	Octocrylene	0.5	0	< 0.4	39	Male	White	Hispanic or Latino	175	87.6	28.6	2.06	V
S1.6	Spray #1	Octocrylene	1	0	< 0.4	39	Male	White	Hispanic or Latino	175	87.6	28.6	2.06	V
S1.6	Spray #1	Octocrylene	1.5	0	< 0.4	39	Male	White	Hispanic or Latino	175	87.6	28.6	2.06	V
S1.6	Spray #1	Octocrylene	2	0	< 0.4	39	Male	White	Hispanic or Latino	175	87.6	28.6	2.06	V
S1.6	Spray #1	Octocrylene	4	0	< 0.4	39	Male	White	Hispanic or Latino	175	87.6	28.6	2.06	V
S1.6	Spray #1	Octocrylene	6	0.53		39	Male	White	Hispanic or Latino	175	87.6	28.6	2.06	V
S1.6	Spray #1	Octocrylene	8	1.15		39	Male	White	Hispanic or Latino	175	87.6	28.6	2.06	V
S1.6	Spray #1	Octocrylene	9	0.45		39	Male	White	Hispanic or Latino	175	87.6	28.6	2.06	V
S1.6	Spray #1	Octocrylene	10	0	< 0.4	39	Male	White	Hispanic or Latino	175	87.6	28.6	2.06	V
S1.6	Spray #1	Octocrylene	12	0	< 0.4	39	Male	White	Hispanic or Latino	175	87.6	28.6	2.06	V
S1.6	Spray #1	Octocrylene	14	0	< 0.4	39	Male	White	Hispanic or Latino	175	87.6	28.6	2.06	V
S1.6	Spray #1	Octocrylene	23	0.4		39	Male	White	Hispanic or Latino	175	87.6	28.6	2.06	V
S1.6	Spray #1	Octocrylene	28	0	< 0.4	39	Male	White	Hispanic or Latino	175	87.6	28.6	2.06	V
S1.6	Spray #1	Octocrylene	33	2.15		39	Male	White	Hispanic or Latino	175	87.6	28.6	2.06	V
S1.6	Spray #1	Octocrylene	47	0.66		39	Male	White	Hispanic or Latino	175	87.6	28.6	2.06	V
S1.6	Spray #1	Octocrylene	52	0.65		39	Male	White	Hispanic or Latino	175	87.6	28.6	2.06	V
S1.6	Spray #1	Octocrylene	57	1.24		39	Male	White	Hispanic or Latino	175	87.6	28.6	2.06	V
S1.6	Spray #1	Octocrylene	71	1.08		39	Male	White	Hispanic or Latino	175	87.6	28.6	2.06	V
S1.6	Spray #1	Octocrylene	73	0.69		39	Male	White	Hispanic or Latino	175	87.6	28.6	2.06	V
S1.6	Spray #1	Octocrylene	74	0.77		39	Male	White	Hispanic or Latino	175	87.6	28.6	2.06	V
S1.6	Spray #1	Octocrylene	76	0.63		39	Male	White	Hispanic or Latino	175	87.6	28.6	2.06	V
S1.6	Spray #1	Octocrylene	78	2.99		39	Male	White	Hispanic or Latino	175	87.6	28.6	2.06	V
S1.6	Spray #1	Octocrylene	81	0.99		39	Male	White	Hispanic or Latino	175	87.6	28.6	2.06	V
S1.6	Spray #1	Octocrylene	82	9.83		39	Male	White	Hispanic or Latino	175	87.6	28.6	2.06	V
S1.6	Spray #1	Octocrylene	84	1.45		39	Male	White	Hispanic or Latino	175	87.6	28.6	2.06	V
S1.6	Spray #1	Octocrylene	86	0.88		39	Male	White	Hispanic or Latino	175	87.6	28.6	2.06	V
S1.6	Spray #1	Octocrylene	95	0.95		39	Male	White	Hispanic or Latino	175	87.6	28.6	2.06	V
S1.6	Spray #1	Octocrylene	120	1.04		39	Male	White	Hispanic or Latino	175	87.6	28.6	2.06	V
S1.6	Spray #1	Octocrylene	144	0.55		39	Male	White	Hispanic or Latino	175	87.6	28.6	2.06	V
S1.6	Spray #1	Oxybenzone	0	0	< 0.4	39	Male	White	Hispanic or Latino	175	87.6	28.6	2.06	V
S1.6	Spray #1	Oxybenzone	0.5	3.58		39	Male	White	Hispanic or Latino	175	87.6	28.6	2.06	V
S1.6	Spray #1	Oxybenzone	1	14.39		39	Male	White	Hispanic or Latino	175	87.6	28.6	2.06	V
S1.6	Spray #1	Oxybenzone	1.5	21.24		39	Male	White	Hispanic or Latino	175	87.6	28.6	2.06	V
S1.6	Spray #1	Oxybenzone	2	34.35		39	Male	White	Hispanic or Latino	175	87.6	28.6	2.06	V
S1.6	Spray #1	Oxybenzone	4	56.71		39	Male	White	Hispanic or Latino	175	87.6	28.6	2.06	V
S1.6	Spray #1	Oxybenzone	6	133		39	Male	White	Hispanic or Latino	175	87.6	28.6	2.06	V
S1.6	Spray #1	Oxybenzone	8	129.62		39	Male	White	Hispanic or Latino	175	87.6	28.6	2.06	V
S1.6	Spray #1	Oxybenzone	9	94.52		39	Male	White	Hispanic or Latino	175	87.6	28.6	2.06	V
S1.6	Spray #1	Oxybenzone	10	84.04		39	Male	White	Hispanic or Latino	175	87.6	28.6	2.06	V
S1.6	Spray #1	Oxybenzone	12	110.12		39	Male	White	Hispanic or Latino	175	87.6	28.6	2.06	V
S1.6	Spray #1	Oxybenzone	14	92.75		39	Male	White	Hispanic or Latino	175	87.6	28.6	2.06	V
S1.6	Spray #1	Oxybenzone	23	84.64		39	Male	White	Hispanic or Latino	175	87.6	28.6	2.06	V
S1.6	Spray #1	Oxybenzone	28	83.22		39	Male	White	Hispanic or Latino	175	87.6	28.6	2.06	V
S1.6	Spray #1	Oxybenzone	33	115.26		39	Male	White	Hispanic or Latino	175	87.6	28.6	2.06	V
S1.6	Spray #1	Oxybenzone	47	89.1		39	Male	White	Hispanic or Latino	175	87.6	28.6	2.06	V
S1.6	Spray #1	Oxybenzone	52	106.02		39	Male	White	Hispanic or Latino	175	87.6	28.6	2.06	V
S1.6	Spray #1	Oxybenzone	57	209.83		39	Male	White	Hispanic or Latino	175	87.6	28.6	2.06	V
S1.6	Spray #1	Oxybenzone	71	107.85		39	Male	White	Hispanic or Latino	175	87.6	28.6	2.06	V
S1.6	Spray #1	Oxybenzone	73	139.86		39	Male	White	Hispanic or Latino	175	87.6	28.6	2.06	V
S1.6	Spray #1	Oxybenzone	74	129.66		39	Male	White	Hispanic or Latino	175	87.6	28.6	2.06	V
S1.6	Spray #1	Oxybenzone	76	112.42		39	Male	White	Hispanic or Latino	175	87.6	28.6	2.06	V
S1.6	Spray #1	Oxybenzone	78	116.16		39	Male	White	Hispanic or Latino	175	87.6	28.6	2.06	V
S1.6	Spray #1	Oxybenzone	81	91.48		39	Male	White	Hispanic or Latino	175	87.6	28.6	2.06	V
S1.6	Spray #1	Oxybenzone	82	106.09		39	Male	White	Hispanic or Latino	175	87.6	28.6	2.06	V
S1.6	Spray #1	Oxybenzone	84	144.88		39	Male	White	Hispanic or Latino	175	87.6	28.6	2.06	V
S1.6	Spray #1	Oxybenzone	86	86.06		39	Male	White	Hispanic or Latino	175	87.6	28.6	2.06	V
S1.6	Spray #1	Oxybenzone	95	120.56		39	Male	White	Hispanic or Latino	175	87.6	28.6	2.06	V
S1.6	Spray #1	Oxybenzone	120	78.09		39	Male	White	Hispanic or Latino	175	87.6	28.6	2.06	V
S1.6	Spray #1	Oxybenzone	144	40.66		39	Male	White	Hispanic or Latino	175	87.6	28.6	2.06	V
S2.1	Spray #2	Avobenzone	0	0	< 0.2	46	Female	White	Not Hispanic or Latino	161.5	58	22.2	1.61	IV
S2.1	Spray #2	Avobenzone	0.5	0	< 0.2	46	Female	White	Not Hispanic or Latino	161.5	58	22.2	1.61	IV
S2.1	Spray #2	Avobenzone	1	0	< 0.2	46	Female	White	Not Hispanic or Latino	161.5	58	22.2	1.61	IV
S2.1	Spray #2	Avobenzone	1.5	0	< 0.2	46	Female	White	Not Hispanic or Latino	161.5	58	22.2	1.61	IV
S2.1	Spray #2	Avobenzone	2	0	< 0.2	46	Female	White	Not Hispanic or Latino	161.5	58	22.2	1.61	IV
S2.1	Spray #2	Avobenzone	4	0.82		46	Female	White	Not Hispanic or Latino	161.5	58	22.2	1.61	IV
S2.1	Spray #2	Avobenzone	6	1.13		46	Female	White	Not Hispanic or Latino	161.5	58	22.2	1.61	IV
S2.1	Spray #2	Avobenzone	8	2.18		46	Female	White	Not Hispanic or Latino	161.5	58	22.2	1.61	IV
S2.1	Spray #2	Avobenzone	9	1.58		46	Female	White	Not Hispanic or Latino	161.5	58	22.2	1.61	IV
S2.1	Spray #2	Avobenzone	10	1.47		46	Female	White	Not Hispanic or Latino	161.5	58	22.2	1.61	IV
S2.1	Spray #2	Avobenzone	12	1.48		46	Female	White	Not Hispanic or Latino	161.5	58	22.2	1.61	IV
S2.1	Spray #2	Avobenzone	14	2.1		46	Female	White	Not Hispanic or Latino	161.5	58	22.2	1.61	IV
S2.1	Spray #2	Avobenzone	23	1.82		46	Female	White	Not Hispanic or Latino	161.5	58	22.2	1.61	IV
S2.1	Spray #2	Avobenzone	28	2.24		46	Female	White	Not Hispanic or Latino	161.5	58	22.2	1.61	IV
S2.1	Spray #2	Avobenzone	33	4.52		46	Female	White	Not Hispanic or Latino	161.5	58	22.2	1.61	IV
S2.1	Spray #2	Avobenzone	47	2.39		46	Female	White	Not Hispanic or Latino	161.5	58	22.2	1.61	IV
S2.1	Spray #2	Avobenzone	52	2.64		46	Female	White	Not Hispanic or Latino	161.5	58	22.2	1.61	IV
S2.1	Spray #2	Avobenzone	57	3.56		46	Female	White	Not Hispanic or Latino	161.5	58	22.2	1.61	IV
S2.1	Spray #2	Avobenzone	71	2.96		46	Female	White	Not Hispanic or Latino	161.5	58	22.2	1.61	IV
S2.1	Spray #2	Avobenzone	73	1.94		46	Female	White	Not Hispanic or Latino	161.5	58	22.2	1.61	IV
S2.1	Spray #2	Avobenzone	74	2.43		46	Female	White	Not Hispanic or Latino	161.5	58	22.2	1.61	IV
S2.1	Spray #2	Avobenzone	76	2.44		46	Female	White	Not Hispanic or Latino	161.5	58	22.2	1.61	IV
S2.1	Spray #2	Avobenzone	78	4.27		46	Female	White	Not Hispanic or Latino	161.5	58	22.2	1.61	IV
S2.1	Spray #2	Avobenzone	81	2.18		46	Female	White	Not Hispanic or Latino	161.5	58	22.2	1.61	IV
S2.1	Spray #2	Avobenzone	82	2.69		46	Female	White	Not Hispanic or Latino	161.5	58	22.2	1.61	IV
S2.1	Spray #2	Avobenzone	84	3.49		46	Female	White	Not Hispanic or Latino	161.5	58	22.2	1.61	IV
S2.1	Spray #2	Avobenzone	86	2.3		46	Female	White	Not Hispanic or Latino	161.5	58	22.2	1.61	IV
S2.1	Spray #2	Avobenzone	95	1.96		46	Female	White	Not Hispanic or Latino	161.5	58	22.2	1.61	IV
S2.1	Spray #2	Avobenzone	120	1.87		46	Female	White	Not Hispanic or Latino	161.5	58	22.2	1.61	IV
S2.1	Spray #2	Avobenzone	144	1.6		46	Female	White	Not Hispanic or Latino	161.5	58	22.2	1.61	IV
S2.1	Spray #2	Octocrylene	0	0	< 0.4	46	Female	White	Not Hispanic or Latino	161.5	58	22.2	1.61	IV
S2.1	Spray #2	Octocrylene	0.5	0	< 0.4	46	Female	White	Not Hispanic or Latino	161.5	58	22.2	1.61	IV
S2.1	Spray #2	Octocrylene	1	0.83		46	Female	White	Not Hispanic or Latino	161.5	58	22.2	1.61	IV
S2.1	Spray #2	Octocrylene	1.5	0.92		46	Female	White	Not Hispanic or Latino	161.5	58	22.2	1.61	IV
S2.1	Spray #2	Octocrylene	2	1.09		46	Female	White	Not Hispanic or Latino	161.5	58	22.2	1.61	IV
S2.1	Spray #2	Octocrylene	4	2.01		46	Female	White	Not Hispanic or Latino	161.5	58	22.2	1.61	IV
S2.1	Spray #2	Octocrylene	6	2.22		46	Female	White	Not Hispanic or Latino	161.5	58	22.2	1.61	IV
S2.1	Spray #2	Octocrylene	8	6		46	Female	White	Not Hispanic or Latino	161.5	58	22.2	1.61	IV
S2.1	Spray #2	Octocrylene	9	4.41		46	Female	White	Not Hispanic or Latino	161.5	58	22.2	1.61	IV
S2.1	Spray #2	Octocrylene	10	2.25		46	Female	White	Not Hispanic or Latino	161.5	58	22.2	1.61	IV
S2.1	Spray #2	Octocrylene	12	2.82		46	Female	White	Not Hispanic or Latino	161.5	58	22.2	1.61	IV
S2.1	Spray #2	Octocrylene	14	3.04		46	Female	White	Not Hispanic or Latino	161.5	58	22.2	1.61	IV
S2.1	Spray #2	Octocrylene	23	2.9		46	Female	White	Not Hispanic or Latino	161.5	58	22.2	1.61	IV
S2.1	Spray #2	Octocrylene	28	3.57		46	Female	White	Not Hispanic or Latino	161.5	58	22.2	1.61	IV
S2.1	Spray #2	Octocrylene	33	12.06		46	Female	White	Not Hispanic or Latino	161.5	58	22.2	1.61	IV
S2.1	Spray #2	Octocrylene	47	3.8		46	Female	White	Not Hispanic or Latino	161.5	58	22.2	1.61	IV
S2.1	Spray #2	Octocrylene	52	4.84		46	Female	White	Not Hispanic or Latino	161.5	58	22.2	1.61	IV
S2.1	Spray #2	Octocrylene	57	5.25		46	Female	White	Not Hispanic or Latino	161.5	58	22.2	1.61	IV
S2.1	Spray #2	Octocrylene	71	6.18		46	Female	White	Not Hispanic or Latino	161.5	58	22.2	1.61	IV
S2.1	Spray #2	Octocrylene	73	2.97		46	Female	White	Not Hispanic or Latino	161.5	58	22.2	1.61	IV
S2.1	Spray #2	Octocrylene	74	4.07		46	Female	White	Not Hispanic or Latino	161.5	58	22.2	1.61	IV
S2.1	Spray #2	Octocrylene	76	4.27		46	Female	White	Not Hispanic or Latino	161.5	58	22.2	1.61	IV
S2.1	Spray #2	Octocrylene	78	8.84		46	Female	White	Not Hispanic or Latino	161.5	58	22.2	1.61	IV
S2.1	Spray #2	Octocrylene	81	4.25		46	Female	White	Not Hispanic or Latino	161.5	58	22.2	1.61	IV
S2.1	Spray #2	Octocrylene	82	5.15		46	Female	White	Not Hispanic or Latino	161.5	58	22.2	1.61	IV
S2.1	Spray #2	Octocrylene	84	7.19		46	Female	White	Not Hispanic or Latino	161.5	58	22.2	1.61	IV
S2.1	Spray #2	Octocrylene	86	3.25		46	Female	White	Not Hispanic or Latino	161.5	58	22.2	1.61	IV
S2.1	Spray #2	Octocrylene	95	2.84		46	Female	White	Not Hispanic or Latino	161.5	58	22.2	1.61	IV
S2.1	Spray #2	Octocrylene	120	2.95		46	Female	White	Not Hispanic or Latino	161.5	58	22.2	1.61	IV
S2.1	Spray #2	Octocrylene	144	2.58		46	Female	White	Not Hispanic or Latino	161.5	58	22.2	1.61	IV
S2.1	Spray #2	Oxybenzone	0	0	< 0.4	46	Female	White	Not Hispanic or Latino	161.5	58	22.2	1.61	IV
S2.1	Spray #2	Oxybenzone	0.5	5.58		46	Female	White	Not Hispanic or Latino	161.5	58	22.2	1.61	IV
S2.1	Spray #2	Oxybenzone	1	31.34		46	Female	White	Not Hispanic or Latino	161.5	58	22.2	1.61	IV
S2.1	Spray #2	Oxybenzone	1.5	95.96		46	Female	White	Not Hispanic or Latino	161.5	58	22.2	1.61	IV
S2.1	Spray #2	Oxybenzone	2	177.13		46	Female	White	Not Hispanic or Latino	161.5	58	22.2	1.61	IV
S2.1	Spray #2	Oxybenzone	4	235.05		46	Female	White	Not Hispanic or Latino	161.5	58	22.2	1.61	IV
S2.1	Spray #2	Oxybenzone	6	297.09		46	Female	White	Not Hispanic or Latino	161.5	58	22.2	1.61	IV
S2.1	Spray #2	Oxybenzone	8	177.94		46	Female	White	Not Hispanic or Latino	161.5	58	22.2	1.61	IV
S2.1	Spray #2	Oxybenzone	9	65.18		46	Female	White	Not Hispanic or Latino	161.5	58	22.2	1.61	IV
S2.1	Spray #2	Oxybenzone	10	75.11		46	Female	White	Not Hispanic or Latino	161.5	58	22.2	1.61	IV
S2.1	Spray #2	Oxybenzone	12	124.9		46	Female	White	Not Hispanic or Latino	161.5	58	22.2	1.61	IV
S2.1	Spray #2	Oxybenzone	14	212.98		46	Female	White	Not Hispanic or Latino	161.5	58	22.2	1.61	IV
S2.1	Spray #2	Oxybenzone	23	68.71		46	Female	White	Not Hispanic or Latino	161.5	58	22.2	1.61	IV
S2.1	Spray #2	Oxybenzone	28	154.53		46	Female	White	Not Hispanic or Latino	161.5	58	22.2	1.61	IV
S2.1	Spray #2	Oxybenzone	33	61.21		46	Female	White	Not Hispanic or Latino	161.5	58	22.2	1.61	IV
S2.1	Spray #2	Oxybenzone	47	93.08		46	Female	White	Not Hispanic or Latino	161.5	58	22.2	1.61	IV
S2.1	Spray #2	Oxybenzone	52	166.73		46	Female	White	Not Hispanic or Latino	161.5	58	22.2	1.61	IV
S2.1	Spray #2	Oxybenzone	57	135.75		46	Female	White	Not Hispanic or Latino	161.5	58	22.2	1.61	IV
S2.1	Spray #2	Oxybenzone	71	99.95		46	Female	White	Not Hispanic or Latino	161.5	58	22.2	1.61	IV
S2.1	Spray #2	Oxybenzone	73	72.17		46	Female	White	Not Hispanic or Latino	161.5	58	22.2	1.61	IV
S2.1	Spray #2	Oxybenzone	74	100.27		46	Female	White	Not Hispanic or Latino	161.5	58	22.2	1.61	IV
S2.1	Spray #2	Oxybenzone	76	172.22		46	Female	White	Not Hispanic or Latino	161.5	58	22.2	1.61	IV
S2.1	Spray #2	Oxybenzone	78	218.8		46	Female	White	Not Hispanic or Latino	161.5	58	22.2	1.61	IV
S2.1	Spray #2	Oxybenzone	81	113.52		46	Female	White	Not Hispanic or Latino	161.5	58	22.2	1.61	IV
S2.1	Spray #2	Oxybenzone	82	107.65		46	Female	White	Not Hispanic or Latino	161.5	58	22.2	1.61	IV
S2.1	Spray #2	Oxybenzone	84	173.62		46	Female	White	Not Hispanic or Latino	161.5	58	22.2	1.61	IV
S2.1	Spray #2	Oxybenzone	86	86.43		46	Female	White	Not Hispanic or Latino	161.5	58	22.2	1.61	IV
S2.1	Spray #2	Oxybenzone	95	56.27		46	Female	White	Not Hispanic or Latino	161.5	58	22.2	1.61	IV
S2.1	Spray #2	Oxybenzone	120	83.06		46	Female	White	Not Hispanic or Latino	161.5	58	22.2	1.61	IV
S2.1	Spray #2	Oxybenzone	144	42.38		46	Female	White	Not Hispanic or Latino	161.5	58	22.2	1.61	IV
S2.2	Spray #2	Avobenzone	0	0	< 0.2	22	Female	Black or African American	Not Hispanic or Latino	160	58.2	22.7	1.61	V
S2.2	Spray #2	Avobenzone	0.5	0	< 0.2	22	Female	Black or African American	Not Hispanic or Latino	160	58.2	22.7	1.61	V
S2.2	Spray #2	Avobenzone	1	0	< 0.2	22	Female	Black or African American	Not Hispanic or Latino	160	58.2	22.7	1.61	V
S2.2	Spray #2	Avobenzone	1.5	0	< 0.2	22	Female	Black or African American	Not Hispanic or Latino	160	58.2	22.7	1.61	V
S2.2	Spray #2	Avobenzone	2	0	< 0.2	22	Female	Black or African American	Not Hispanic or Latino	160	58.2	22.7	1.61	V
S2.2	Spray #2	Avobenzone	4	0	< 0.2	22	Female	Black or African American	Not Hispanic or Latino	160	58.2	22.7	1.61	V
S2.2	Spray #2	Avobenzone	6	0.35		22	Female	Black or African American	Not Hispanic or Latino	160	58.2	22.7	1.61	V
S2.2	Spray #2	Avobenzone	8	0.7		22	Female	Black or African American	Not Hispanic or Latino	160	58.2	22.7	1.61	V
S2.2	Spray #2	Avobenzone	9	1.02		22	Female	Black or African American	Not Hispanic or Latino	160	58.2	22.7	1.61	V
S2.2	Spray #2	Avobenzone	10	1.01		22	Female	Black or African American	Not Hispanic or Latino	160	58.2	22.7	1.61	V
S2.2	Spray #2	Avobenzone	12	0.89		22	Female	Black or African American	Not Hispanic or Latino	160	58.2	22.7	1.61	V
S2.2	Spray #2	Avobenzone	14	1.23		22	Female	Black or African American	Not Hispanic or Latino	160	58.2	22.7	1.61	V
S2.2	Spray #2	Avobenzone	23	1.26		22	Female	Black or African American	Not Hispanic or Latino	160	58.2	22.7	1.61	V
S2.2	Spray #2	Avobenzone	28	1.31		22	Female	Black or African American	Not Hispanic or Latino	160	58.2	22.7	1.61	V
S2.2	Spray #2	Avobenzone	33	1.66		22	Female	Black or African American	Not Hispanic or Latino	160	58.2	22.7	1.61	V
S2.2	Spray #2	Avobenzone	47	1.59		22	Female	Black or African American	Not Hispanic or Latino	160	58.2	22.7	1.61	V
S2.2	Spray #2	Avobenzone	52	1.67		22	Female	Black or African American	Not Hispanic or Latino	160	58.2	22.7	1.61	V
S2.2	Spray #2	Avobenzone	57	2.13		22	Female	Black or African American	Not Hispanic or Latino	160	58.2	22.7	1.61	V
S2.2	Spray #2	Avobenzone	71	1.46		22	Female	Black or African American	Not Hispanic or Latino	160	58.2	22.7	1.61	V
S2.2	Spray #2	Avobenzone	73	1.97		22	Female	Black or African American	Not Hispanic or Latino	160	58.2	22.7	1.61	V
S2.2	Spray #2	Avobenzone	74	1.67		22	Female	Black or African American	Not Hispanic or Latino	160	58.2	22.7	1.61	V
S2.2	Spray #2	Avobenzone	76	1.22		22	Female	Black or African American	Not Hispanic or Latino	160	58.2	22.7	1.61	V
S2.2	Spray #2	Avobenzone	78	1.33		22	Female	Black or African American	Not Hispanic or Latino	160	58.2	22.7	1.61	V
S2.2	Spray #2	Avobenzone	81	1.5		22	Female	Black or African American	Not Hispanic or Latino	160	58.2	22.7	1.61	V
S2.2	Spray #2	Avobenzone	82	2.48		22	Female	Black or African American	Not Hispanic or Latino	160	58.2	22.7	1.61	V
S2.2	Spray #2	Avobenzone	84	2.02		22	Female	Black or African American	Not Hispanic or Latino	160	58.2	22.7	1.61	V
S2.2	Spray #2	Avobenzone	86	1.74		22	Female	Black or African American	Not Hispanic or Latino	160	58.2	22.7	1.61	V
S2.2	Spray #2	Avobenzone	95	2.07		22	Female	Black or African American	Not Hispanic or Latino	160	58.2	22.7	1.61	V
S2.2	Spray #2	Avobenzone	120	1.39		22	Female	Black or African American	Not Hispanic or Latino	160	58.2	22.7	1.61	V
S2.2	Spray #2	Avobenzone	144	0.93		22	Female	Black or African American	Not Hispanic or Latino	160	58.2	22.7	1.61	V
S2.2	Spray #2	Octocrylene	0	0	< 0.4	22	Female	Black or African American	Not Hispanic or Latino	160	58.2	22.7	1.61	V
S2.2	Spray #2	Octocrylene	0.5	0	< 0.4	22	Female	Black or African American	Not Hispanic or Latino	160	58.2	22.7	1.61	V
S2.2	Spray #2	Octocrylene	1	0	< 0.4	22	Female	Black or African American	Not Hispanic or Latino	160	58.2	22.7	1.61	V
S2.2	Spray #2	Octocrylene	1.5	0	< 0.4	22	Female	Black or African American	Not Hispanic or Latino	160	58.2	22.7	1.61	V
S2.2	Spray #2	Octocrylene	2	0	< 0.4	22	Female	Black or African American	Not Hispanic or Latino	160	58.2	22.7	1.61	V
S2.2	Spray #2	Octocrylene	4	0	< 0.4	22	Female	Black or African American	Not Hispanic or Latino	160	58.2	22.7	1.61	V
S2.2	Spray #2	Octocrylene	6	0.69		22	Female	Black or African American	Not Hispanic or Latino	160	58.2	22.7	1.61	V
S2.2	Spray #2	Octocrylene	8	1.38		22	Female	Black or African American	Not Hispanic or Latino	160	58.2	22.7	1.61	V
S2.2	Spray #2	Octocrylene	9	1.52		22	Female	Black or African American	Not Hispanic or Latino	160	58.2	22.7	1.61	V
S2.2	Spray #2	Octocrylene	10	2.58		22	Female	Black or African American	Not Hispanic or Latino	160	58.2	22.7	1.61	V
S2.2	Spray #2	Octocrylene	12	1.58		22	Female	Black or African American	Not Hispanic or Latino	160	58.2	22.7	1.61	V
S2.2	Spray #2	Octocrylene	14	1.77		22	Female	Black or African American	Not Hispanic or Latino	160	58.2	22.7	1.61	V
S2.2	Spray #2	Octocrylene	23	1.48		22	Female	Black or African American	Not Hispanic or Latino	160	58.2	22.7	1.61	V
S2.2	Spray #2	Octocrylene	28	1.48		22	Female	Black or African American	Not Hispanic or Latino	160	58.2	22.7	1.61	V
S2.2	Spray #2	Octocrylene	33	1.97		22	Female	Black or African American	Not Hispanic or Latino	160	58.2	22.7	1.61	V
S2.2	Spray #2	Octocrylene	47	2.1		22	Female	Black or African American	Not Hispanic or Latino	160	58.2	22.7	1.61	V
S2.2	Spray #2	Octocrylene	52	2		22	Female	Black or African American	Not Hispanic or Latino	160	58.2	22.7	1.61	V
S2.2	Spray #2	Octocrylene	57	2.59		22	Female	Black or African American	Not Hispanic or Latino	160	58.2	22.7	1.61	V
S2.2	Spray #2	Octocrylene	71	1.91		22	Female	Black or African American	Not Hispanic or Latino	160	58.2	22.7	1.61	V
S2.2	Spray #2	Octocrylene	73	2.95		22	Female	Black or African American	Not Hispanic or Latino	160	58.2	22.7	1.61	V
S2.2	Spray #2	Octocrylene	74	2.49		22	Female	Black or African American	Not Hispanic or Latino	160	58.2	22.7	1.61	V
S2.2	Spray #2	Octocrylene	76	1.82		22	Female	Black or African American	Not Hispanic or Latino	160	58.2	22.7	1.61	V
S2.2	Spray #2	Octocrylene	78	1.67		22	Female	Black or African American	Not Hispanic or Latino	160	58.2	22.7	1.61	V
S2.2	Spray #2	Octocrylene	81	2.08		22	Female	Black or African American	Not Hispanic or Latino	160	58.2	22.7	1.61	V
S2.2	Spray #2	Octocrylene	82	2.8		22	Female	Black or African American	Not Hispanic or Latino	160	58.2	22.7	1.61	V
S2.2	Spray #2	Octocrylene	84	2.23		22	Female	Black or African American	Not Hispanic or Latino	160	58.2	22.7	1.61	V
S2.2	Spray #2	Octocrylene	86	2.23		22	Female	Black or African American	Not Hispanic or Latino	160	58.2	22.7	1.61	V
S2.2	Spray #2	Octocrylene	95	2.2		22	Female	Black or African American	Not Hispanic or Latino	160	58.2	22.7	1.61	V
S2.2	Spray #2	Octocrylene	120	1.56		22	Female	Black or African American	Not Hispanic or Latino	160	58.2	22.7	1.61	V
S2.2	Spray #2	Octocrylene	144	1.34		22	Female	Black or African American	Not Hispanic or Latino	160	58.2	22.7	1.61	V
S2.2	Spray #2	Oxybenzone	0	0	< 0.4	22	Female	Black or African American	Not Hispanic or Latino	160	58.2	22.7	1.61	V
S2.2	Spray #2	Oxybenzone	0.5	3.75		22	Female	Black or African American	Not Hispanic or Latino	160	58.2	22.7	1.61	V
S2.2	Spray #2	Oxybenzone	1	18.36		22	Female	Black or African American	Not Hispanic or Latino	160	58.2	22.7	1.61	V
S2.2	Spray #2	Oxybenzone	1.5	39.5		22	Female	Black or African American	Not Hispanic or Latino	160	58.2	22.7	1.61	V
S2.2	Spray #2	Oxybenzone	2	28.39		22	Female	Black or African American	Not Hispanic or Latino	160	58.2	22.7	1.61	V
S2.2	Spray #2	Oxybenzone	4	57.65		22	Female	Black or African American	Not Hispanic or Latino	160	58.2	22.7	1.61	V
S2.2	Spray #2	Oxybenzone	6	59.4		22	Female	Black or African American	Not Hispanic or Latino	160	58.2	22.7	1.61	V
S2.2	Spray #2	Oxybenzone	8	147.14		22	Female	Black or African American	Not Hispanic or Latino	160	58.2	22.7	1.61	V
S2.2	Spray #2	Oxybenzone	9	88.49		22	Female	Black or African American	Not Hispanic or Latino	160	58.2	22.7	1.61	V
S2.2	Spray #2	Oxybenzone	10	85.65		22	Female	Black or African American	Not Hispanic or Latino	160	58.2	22.7	1.61	V
S2.2	Spray #2	Oxybenzone	12	68.1		22	Female	Black or African American	Not Hispanic or Latino	160	58.2	22.7	1.61	V
S2.2	Spray #2	Oxybenzone	14	55.08		22	Female	Black or African American	Not Hispanic or Latino	160	58.2	22.7	1.61	V
S2.2	Spray #2	Oxybenzone	23	38.92		22	Female	Black or African American	Not Hispanic or Latino	160	58.2	22.7	1.61	V
S2.2	Spray #2	Oxybenzone	28	70.95		22	Female	Black or African American	Not Hispanic or Latino	160	58.2	22.7	1.61	V
S2.2	Spray #2	Oxybenzone	33	74.87		22	Female	Black or African American	Not Hispanic or Latino	160	58.2	22.7	1.61	V
S2.2	Spray #2	Oxybenzone	47	61.38		22	Female	Black or African American	Not Hispanic or Latino	160	58.2	22.7	1.61	V
S2.2	Spray #2	Oxybenzone	52	71.68		22	Female	Black or African American	Not Hispanic or Latino	160	58.2	22.7	1.61	V
S2.2	Spray #2	Oxybenzone	57	59.74		22	Female	Black or African American	Not Hispanic or Latino	160	58.2	22.7	1.61	V
S2.2	Spray #2	Oxybenzone	71	47.89		22	Female	Black or African American	Not Hispanic or Latino	160	58.2	22.7	1.61	V
S2.2	Spray #2	Oxybenzone	73	81.74		22	Female	Black or African American	Not Hispanic or Latino	160	58.2	22.7	1.61	V
S2.2	Spray #2	Oxybenzone	74	70.44		22	Female	Black or African American	Not Hispanic or Latino	160	58.2	22.7	1.61	V
S2.2	Spray #2	Oxybenzone	76	56.49		22	Female	Black or African American	Not Hispanic or Latino	160	58.2	22.7	1.61	V
S2.2	Spray #2	Oxybenzone	78	89.69		22	Female	Black or African American	Not Hispanic or Latino	160	58.2	22.7	1.61	V
S2.2	Spray #2	Oxybenzone	81	95.79		22	Female	Black or African American	Not Hispanic or Latino	160	58.2	22.7	1.61	V
S2.2	Spray #2	Oxybenzone	82	119.52		22	Female	Black or African American	Not Hispanic or Latino	160	58.2	22.7	1.61	V
S2.2	Spray #2	Oxybenzone	84	71.88		22	Female	Black or African American	Not Hispanic or Latino	160	58.2	22.7	1.61	V
S2.2	Spray #2	Oxybenzone	86	73.11		22	Female	Black or African American	Not Hispanic or Latino	160	58.2	22.7	1.61	V
S2.2	Spray #2	Oxybenzone	95	69.76		22	Female	Black or African American	Not Hispanic or Latino	160	58.2	22.7	1.61	V
S2.2	Spray #2	Oxybenzone	120	22.05		22	Female	Black or African American	Not Hispanic or Latino	160	58.2	22.7	1.61	V
S2.2	Spray #2	Oxybenzone	144	18.28		22	Female	Black or African American	Not Hispanic or Latino	160	58.2	22.7	1.61	V
S2.3	Spray #2	Avobenzone	0	0	< 0.2	33	Female	Black or African American	Not Hispanic or Latino	164	59.6	22.2	1.65	VI
S2.3	Spray #2	Avobenzone	0.5	0	< 0.2	33	Female	Black or African American	Not Hispanic or Latino	164	59.6	22.2	1.65	VI
S2.3	Spray #2	Avobenzone	1	0	< 0.2	33	Female	Black or African American	Not Hispanic or Latino	164	59.6	22.2	1.65	VI
S2.3	Spray #2	Avobenzone	1.5	0	< 0.2	33	Female	Black or African American	Not Hispanic or Latino	164	59.6	22.2	1.65	VI
S2.3	Spray #2	Avobenzone	2	0	< 0.2	33	Female	Black or African American	Not Hispanic or Latino	164	59.6	22.2	1.65	VI
S2.3	Spray #2	Avobenzone	4	0	< 0.2	33	Female	Black or African American	Not Hispanic or Latino	164	59.6	22.2	1.65	VI
S2.3	Spray #2	Avobenzone	6	0.3		33	Female	Black or African American	Not Hispanic or Latino	164	59.6	22.2	1.65	VI
S2.3	Spray #2	Avobenzone	8	0.4		33	Female	Black or African American	Not Hispanic or Latino	164	59.6	22.2	1.65	VI
S2.3	Spray #2	Avobenzone	9	0.23		33	Female	Black or African American	Not Hispanic or Latino	164	59.6	22.2	1.65	VI
S2.3	Spray #2	Avobenzone	10	0.27		33	Female	Black or African American	Not Hispanic or Latino	164	59.6	22.2	1.65	VI
S2.3	Spray #2	Avobenzone	12	0.22		33	Female	Black or African American	Not Hispanic or Latino	164	59.6	22.2	1.65	VI
S2.3	Spray #2	Avobenzone	14	0.35		33	Female	Black or African American	Not Hispanic or Latino	164	59.6	22.2	1.65	VI
S2.3	Spray #2	Avobenzone	23	0.24		33	Female	Black or African American	Not Hispanic or Latino	164	59.6	22.2	1.65	VI
S2.3	Spray #2	Avobenzone	28	0.3		33	Female	Black or African American	Not Hispanic or Latino	164	59.6	22.2	1.65	VI
S2.3	Spray #2	Avobenzone	33	0.68		33	Female	Black or African American	Not Hispanic or Latino	164	59.6	22.2	1.65	VI
S2.3	Spray #2	Avobenzone	47	0.5		33	Female	Black or African American	Not Hispanic or Latino	164	59.6	22.2	1.65	VI
S2.3	Spray #2	Avobenzone	52	0.63		33	Female	Black or African American	Not Hispanic or Latino	164	59.6	22.2	1.65	VI
S2.3	Spray #2	Avobenzone	57	0.71		33	Female	Black or African American	Not Hispanic or Latino	164	59.6	22.2	1.65	VI
S2.3	Spray #2	Avobenzone	71	0.58		33	Female	Black or African American	Not Hispanic or Latino	164	59.6	22.2	1.65	VI
S2.3	Spray #2	Avobenzone	73	0.58		33	Female	Black or African American	Not Hispanic or Latino	164	59.6	22.2	1.65	VI
S2.3	Spray #2	Avobenzone	74	0.91		33	Female	Black or African American	Not Hispanic or Latino	164	59.6	22.2	1.65	VI
S2.3	Spray #2	Avobenzone	76	0.57		33	Female	Black or African American	Not Hispanic or Latino	164	59.6	22.2	1.65	VI
S2.3	Spray #2	Avobenzone	78	0.83		33	Female	Black or African American	Not Hispanic or Latino	164	59.6	22.2	1.65	VI
S2.3	Spray #2	Avobenzone	81	0.8		33	Female	Black or African American	Not Hispanic or Latino	164	59.6	22.2	1.65	VI
S2.3	Spray #2	Avobenzone	82	0.87		33	Female	Black or African American	Not Hispanic or Latino	164	59.6	22.2	1.65	VI
S2.3	Spray #2	Avobenzone	84	0.76		33	Female	Black or African American	Not Hispanic or Latino	164	59.6	22.2	1.65	VI
S2.3	Spray #2	Avobenzone	86	1.01		33	Female	Black or African American	Not Hispanic or Latino	164	59.6	22.2	1.65	VI
S2.3	Spray #2	Avobenzone	95	0.64		33	Female	Black or African American	Not Hispanic or Latino	164	59.6	22.2	1.65	VI
S2.3	Spray #2	Avobenzone	120	0.69		33	Female	Black or African American	Not Hispanic or Latino	164	59.6	22.2	1.65	VI
S2.3	Spray #2	Avobenzone	144	0.26		33	Female	Black or African American	Not Hispanic or Latino	164	59.6	22.2	1.65	VI
S2.3	Spray #2	Octocrylene	0	0	< 0.4	33	Female	Black or African American	Not Hispanic or Latino	164	59.6	22.2	1.65	VI
S2.3	Spray #2	Octocrylene	0.5	0	< 0.4	33	Female	Black or African American	Not Hispanic or Latino	164	59.6	22.2	1.65	VI
S2.3	Spray #2	Octocrylene	1	0	< 0.4	33	Female	Black or African American	Not Hispanic or Latino	164	59.6	22.2	1.65	VI
S2.3	Spray #2	Octocrylene	1.5	0	< 0.4	33	Female	Black or African American	Not Hispanic or Latino	164	59.6	22.2	1.65	VI
S2.3	Spray #2	Octocrylene	2	0	< 0.4	33	Female	Black or African American	Not Hispanic or Latino	164	59.6	22.2	1.65	VI
S2.3	Spray #2	Octocrylene	4	0	< 0.4	33	Female	Black or African American	Not Hispanic or Latino	164	59.6	22.2	1.65	VI
S2.3	Spray #2	Octocrylene	6	0.58		33	Female	Black or African American	Not Hispanic or Latino	164	59.6	22.2	1.65	VI
S2.3	Spray #2	Octocrylene	8	1.09		33	Female	Black or African American	Not Hispanic or Latino	164	59.6	22.2	1.65	VI
S2.3	Spray #2	Octocrylene	9	0.72		33	Female	Black or African American	Not Hispanic or Latino	164	59.6	22.2	1.65	VI
S2.3	Spray #2	Octocrylene	10	0.62		33	Female	Black or African American	Not Hispanic or Latino	164	59.6	22.2	1.65	VI
S2.3	Spray #2	Octocrylene	12	0.68		33	Female	Black or African American	Not Hispanic or Latino	164	59.6	22.2	1.65	VI
S2.3	Spray #2	Octocrylene	14	0.95		33	Female	Black or African American	Not Hispanic or Latino	164	59.6	22.2	1.65	VI
S2.3	Spray #2	Octocrylene	23	0.68		33	Female	Black or African American	Not Hispanic or Latino	164	59.6	22.2	1.65	VI
S2.3	Spray #2	Octocrylene	28	0.71		33	Female	Black or African American	Not Hispanic or Latino	164	59.6	22.2	1.65	VI
S2.3	Spray #2	Octocrylene	33	2.12		33	Female	Black or African American	Not Hispanic or Latino	164	59.6	22.2	1.65	VI
S2.3	Spray #2	Octocrylene	47	1.38		33	Female	Black or African American	Not Hispanic or Latino	164	59.6	22.2	1.65	VI
S2.3	Spray #2	Octocrylene	52	1.41		33	Female	Black or African American	Not Hispanic or Latino	164	59.6	22.2	1.65	VI
S2.3	Spray #2	Octocrylene	57	1.4		33	Female	Black or African American	Not Hispanic or Latino	164	59.6	22.2	1.65	VI
S2.3	Spray #2	Octocrylene	71	1.29		33	Female	Black or African American	Not Hispanic or Latino	164	59.6	22.2	1.65	VI
S2.3	Spray #2	Octocrylene	73	0.96		33	Female	Black or African American	Not Hispanic or Latino	164	59.6	22.2	1.65	VI
S2.3	Spray #2	Octocrylene	74	2.34		33	Female	Black or African American	Not Hispanic or Latino	164	59.6	22.2	1.65	VI
S2.3	Spray #2	Octocrylene	76	1.29		33	Female	Black or African American	Not Hispanic or Latino	164	59.6	22.2	1.65	VI
S2.3	Spray #2	Octocrylene	78	1.74		33	Female	Black or African American	Not Hispanic or Latino	164	59.6	22.2	1.65	VI
S2.3	Spray #2	Octocrylene	81	1.49		33	Female	Black or African American	Not Hispanic or Latino	164	59.6	22.2	1.65	VI
S2.3	Spray #2	Octocrylene	82	1.69		33	Female	Black or African American	Not Hispanic or Latino	164	59.6	22.2	1.65	VI
S2.3	Spray #2	Octocrylene	84	2.49		33	Female	Black or African American	Not Hispanic or Latino	164	59.6	22.2	1.65	VI
S2.3	Spray #2	Octocrylene	86	2.17		33	Female	Black or African American	Not Hispanic or Latino	164	59.6	22.2	1.65	VI
S2.3	Spray #2	Octocrylene	95	1.51		33	Female	Black or African American	Not Hispanic or Latino	164	59.6	22.2	1.65	VI
S2.3	Spray #2	Octocrylene	120	1.69		33	Female	Black or African American	Not Hispanic or Latino	164	59.6	22.2	1.65	VI
S2.3	Spray #2	Octocrylene	144	0.57		33	Female	Black or African American	Not Hispanic or Latino	164	59.6	22.2	1.65	VI
S2.3	Spray #2	Oxybenzone	0	0	< 0.4	33	Female	Black or African American	Not Hispanic or Latino	164	59.6	22.2	1.65	VI
S2.3	Spray #2	Oxybenzone	0.5	0.96		33	Female	Black or African American	Not Hispanic or Latino	164	59.6	22.2	1.65	VI
S2.3	Spray #2	Oxybenzone	1	10.21		33	Female	Black or African American	Not Hispanic or Latino	164	59.6	22.2	1.65	VI
S2.3	Spray #2	Oxybenzone	1.5	6.98		33	Female	Black or African American	Not Hispanic or Latino	164	59.6	22.2	1.65	VI
S2.3	Spray #2	Oxybenzone	2	7.73		33	Female	Black or African American	Not Hispanic or Latino	164	59.6	22.2	1.65	VI
S2.3	Spray #2	Oxybenzone	4	22.84		33	Female	Black or African American	Not Hispanic or Latino	164	59.6	22.2	1.65	VI
S2.3	Spray #2	Oxybenzone	6	46.15		33	Female	Black or African American	Not Hispanic or Latino	164	59.6	22.2	1.65	VI
S2.3	Spray #2	Oxybenzone	8	36.4		33	Female	Black or African American	Not Hispanic or Latino	164	59.6	22.2	1.65	VI
S2.3	Spray #2	Oxybenzone	9	31.73		33	Female	Black or African American	Not Hispanic or Latino	164	59.6	22.2	1.65	VI
S2.3	Spray #2	Oxybenzone	10	20.15		33	Female	Black or African American	Not Hispanic or Latino	164	59.6	22.2	1.65	VI
S2.3	Spray #2	Oxybenzone	12	23.58		33	Female	Black or African American	Not Hispanic or Latino	164	59.6	22.2	1.65	VI
S2.3	Spray #2	Oxybenzone	14	20.26		33	Female	Black or African American	Not Hispanic or Latino	164	59.6	22.2	1.65	VI
S2.3	Spray #2	Oxybenzone	23	18.66		33	Female	Black or African American	Not Hispanic or Latino	164	59.6	22.2	1.65	VI
S2.3	Spray #2	Oxybenzone	28	29.48		33	Female	Black or African American	Not Hispanic or Latino	164	59.6	22.2	1.65	VI
S2.3	Spray #2	Oxybenzone	33	53.76		33	Female	Black or African American	Not Hispanic or Latino	164	59.6	22.2	1.65	VI
S2.3	Spray #2	Oxybenzone	47	31.77		33	Female	Black or African American	Not Hispanic or Latino	164	59.6	22.2	1.65	VI
S2.3	Spray #2	Oxybenzone	52	48.39		33	Female	Black or African American	Not Hispanic or Latino	164	59.6	22.2	1.65	VI
S2.3	Spray #2	Oxybenzone	57	40.01		33	Female	Black or African American	Not Hispanic or Latino	164	59.6	22.2	1.65	VI
S2.3	Spray #2	Oxybenzone	71	27.01		33	Female	Black or African American	Not Hispanic or Latino	164	59.6	22.2	1.65	VI
S2.3	Spray #2	Oxybenzone	73	53.98		33	Female	Black or African American	Not Hispanic or Latino	164	59.6	22.2	1.65	VI
S2.3	Spray #2	Oxybenzone	74	89.3		33	Female	Black or African American	Not Hispanic or Latino	164	59.6	22.2	1.65	VI
S2.3	Spray #2	Oxybenzone	76	44.69		33	Female	Black or African American	Not Hispanic or Latino	164	59.6	22.2	1.65	VI
S2.3	Spray #2	Oxybenzone	78	60.15		33	Female	Black or African American	Not Hispanic or Latino	164	59.6	22.2	1.65	VI
S2.3	Spray #2	Oxybenzone	81	49.98		33	Female	Black or African American	Not Hispanic or Latino	164	59.6	22.2	1.65	VI
S2.3	Spray #2	Oxybenzone	82	58.31		33	Female	Black or African American	Not Hispanic or Latino	164	59.6	22.2	1.65	VI
S2.3	Spray #2	Oxybenzone	84	49.95		33	Female	Black or African American	Not Hispanic or Latino	164	59.6	22.2	1.65	VI
S2.3	Spray #2	Oxybenzone	86	55.45		33	Female	Black or African American	Not Hispanic or Latino	164	59.6	22.2	1.65	VI
S2.3	Spray #2	Oxybenzone	95	48.01		33	Female	Black or African American	Not Hispanic or Latino	164	59.6	22.2	1.65	VI
S2.3	Spray #2	Oxybenzone	120	19.41		33	Female	Black or African American	Not Hispanic or Latino	164	59.6	22.2	1.65	VI
S2.3	Spray #2	Oxybenzone	144	9.76		33	Female	Black or African American	Not Hispanic or Latino	164	59.6	22.2	1.65	VI
S2.4	Spray #2	Avobenzone	0	0	< 0.2	33	Male	Black or African American	Not Hispanic or Latino	181.5	70.6	21.4	1.89	V
S2.4	Spray #2	Avobenzone	0.5	0	< 0.2	33	Male	Black or African American	Not Hispanic or Latino	181.5	70.6	21.4	1.89	V
S2.4	Spray #2	Avobenzone	1	0	< 0.2	33	Male	Black or African American	Not Hispanic or Latino	181.5	70.6	21.4	1.89	V
S2.4	Spray #2	Avobenzone	1.5	0	< 0.2	33	Male	Black or African American	Not Hispanic or Latino	181.5	70.6	21.4	1.89	V
S2.4	Spray #2	Avobenzone	2	0	< 0.2	33	Male	Black or African American	Not Hispanic or Latino	181.5	70.6	21.4	1.89	V
S2.4	Spray #2	Avobenzone	4	0.22		33	Male	Black or African American	Not Hispanic or Latino	181.5	70.6	21.4	1.89	V
S2.4	Spray #2	Avobenzone	6	1.71		33	Male	Black or African American	Not Hispanic or Latino	181.5	70.6	21.4	1.89	V
S2.4	Spray #2	Avobenzone	8	1.52		33	Male	Black or African American	Not Hispanic or Latino	181.5	70.6	21.4	1.89	V
S2.4	Spray #2	Avobenzone	9	1.36		33	Male	Black or African American	Not Hispanic or Latino	181.5	70.6	21.4	1.89	V
S2.4	Spray #2	Avobenzone	10	1.34		33	Male	Black or African American	Not Hispanic or Latino	181.5	70.6	21.4	1.89	V
S2.4	Spray #2	Avobenzone	12	1.57		33	Male	Black or African American	Not Hispanic or Latino	181.5	70.6	21.4	1.89	V
S2.4	Spray #2	Avobenzone	14	1.21		33	Male	Black or African American	Not Hispanic or Latino	181.5	70.6	21.4	1.89	V
S2.4	Spray #2	Avobenzone	23	1.03		33	Male	Black or African American	Not Hispanic or Latino	181.5	70.6	21.4	1.89	V
S2.4	Spray #2	Avobenzone	28	1.51		33	Male	Black or African American	Not Hispanic or Latino	181.5	70.6	21.4	1.89	V
S2.4	Spray #2	Avobenzone	33	3.14		33	Male	Black or African American	Not Hispanic or Latino	181.5	70.6	21.4	1.89	V
S2.4	Spray #2	Avobenzone	47	1.62		33	Male	Black or African American	Not Hispanic or Latino	181.5	70.6	21.4	1.89	V
S2.4	Spray #2	Avobenzone	52	3.55		33	Male	Black or African American	Not Hispanic or Latino	181.5	70.6	21.4	1.89	V
S2.4	Spray #2	Avobenzone	57	7.33		33	Male	Black or African American	Not Hispanic or Latino	181.5	70.6	21.4	1.89	V
S2.4	Spray #2	Avobenzone	71	1.66		33	Male	Black or African American	Not Hispanic or Latino	181.5	70.6	21.4	1.89	V
S2.4	Spray #2	Avobenzone	73	1.65		33	Male	Black or African American	Not Hispanic or Latino	181.5	70.6	21.4	1.89	V
S2.4	Spray #2	Avobenzone	74	1.35		33	Male	Black or African American	Not Hispanic or Latino	181.5	70.6	21.4	1.89	V
S2.4	Spray #2	Avobenzone	76	2.27		33	Male	Black or African American	Not Hispanic or Latino	181.5	70.6	21.4	1.89	V
S2.4	Spray #2	Avobenzone	78	6.41		33	Male	Black or African American	Not Hispanic or Latino	181.5	70.6	21.4	1.89	V
S2.4	Spray #2	Avobenzone	81	3.26		33	Male	Black or African American	Not Hispanic or Latino	181.5	70.6	21.4	1.89	V
S2.4	Spray #2	Avobenzone	82	2.34		33	Male	Black or African American	Not Hispanic or Latino	181.5	70.6	21.4	1.89	V
S2.4	Spray #2	Avobenzone	84	2.15		33	Male	Black or African American	Not Hispanic or Latino	181.5	70.6	21.4	1.89	V
S2.4	Spray #2	Avobenzone	86	2.61		33	Male	Black or African American	Not Hispanic or Latino	181.5	70.6	21.4	1.89	V
S2.4	Spray #2	Avobenzone	95	1.74		33	Male	Black or African American	Not Hispanic or Latino	181.5	70.6	21.4	1.89	V
S2.4	Spray #2	Avobenzone	120	0.87		33	Male	Black or African American	Not Hispanic or Latino	181.5	70.6	21.4	1.89	V
S2.4	Spray #2	Avobenzone	144	0.6		33	Male	Black or African American	Not Hispanic or Latino	181.5	70.6	21.4	1.89	V
S2.4	Spray #2	Octocrylene	0	0	< 0.4	33	Male	Black or African American	Not Hispanic or Latino	181.5	70.6	21.4	1.89	V
S2.4	Spray #2	Octocrylene	0.5	0	< 0.4	33	Male	Black or African American	Not Hispanic or Latino	181.5	70.6	21.4	1.89	V
S2.4	Spray #2	Octocrylene	1	0	< 0.4	33	Male	Black or African American	Not Hispanic or Latino	181.5	70.6	21.4	1.89	V
S2.4	Spray #2	Octocrylene	1.5	0	< 0.4	33	Male	Black or African American	Not Hispanic or Latino	181.5	70.6	21.4	1.89	V
S2.4	Spray #2	Octocrylene	2	0	< 0.4	33	Male	Black or African American	Not Hispanic or Latino	181.5	70.6	21.4	1.89	V
S2.4	Spray #2	Octocrylene	4	0	< 0.4	33	Male	Black or African American	Not Hispanic or Latino	181.5	70.6	21.4	1.89	V
S2.4	Spray #2	Octocrylene	6	2.17		33	Male	Black or African American	Not Hispanic or Latino	181.5	70.6	21.4	1.89	V
S2.4	Spray #2	Octocrylene	8	1.73		33	Male	Black or African American	Not Hispanic or Latino	181.5	70.6	21.4	1.89	V
S2.4	Spray #2	Octocrylene	9	1.27		33	Male	Black or African American	Not Hispanic or Latino	181.5	70.6	21.4	1.89	V
S2.4	Spray #2	Octocrylene	10	1.37		33	Male	Black or African American	Not Hispanic or Latino	181.5	70.6	21.4	1.89	V
S2.4	Spray #2	Octocrylene	12	1.79		33	Male	Black or African American	Not Hispanic or Latino	181.5	70.6	21.4	1.89	V
S2.4	Spray #2	Octocrylene	14	1.78		33	Male	Black or African American	Not Hispanic or Latino	181.5	70.6	21.4	1.89	V
S2.4	Spray #2	Octocrylene	23	1.45		33	Male	Black or African American	Not Hispanic or Latino	181.5	70.6	21.4	1.89	V
S2.4	Spray #2	Octocrylene	28	1.64		33	Male	Black or African American	Not Hispanic or Latino	181.5	70.6	21.4	1.89	V
S2.4	Spray #2	Octocrylene	33	5.05		33	Male	Black or African American	Not Hispanic or Latino	181.5	70.6	21.4	1.89	V
S2.4	Spray #2	Octocrylene	47	2.36		33	Male	Black or African American	Not Hispanic or Latino	181.5	70.6	21.4	1.89	V
S2.4	Spray #2	Octocrylene	52	8.96		33	Male	Black or African American	Not Hispanic or Latino	181.5	70.6	21.4	1.89	V
S2.4	Spray #2	Octocrylene	57	20.44		33	Male	Black or African American	Not Hispanic or Latino	181.5	70.6	21.4	1.89	V
S2.4	Spray #2	Octocrylene	71	2.72		33	Male	Black or African American	Not Hispanic or Latino	181.5	70.6	21.4	1.89	V
S2.4	Spray #2	Octocrylene	73	2.75		33	Male	Black or African American	Not Hispanic or Latino	181.5	70.6	21.4	1.89	V
S2.4	Spray #2	Octocrylene	74	2.41		33	Male	Black or African American	Not Hispanic or Latino	181.5	70.6	21.4	1.89	V
S2.4	Spray #2	Octocrylene	76	3.71		33	Male	Black or African American	Not Hispanic or Latino	181.5	70.6	21.4	1.89	V
S2.4	Spray #2	Octocrylene	78	17.55		33	Male	Black or African American	Not Hispanic or Latino	181.5	70.6	21.4	1.89	V
S2.4	Spray #2	Octocrylene	81	5.93		33	Male	Black or African American	Not Hispanic or Latino	181.5	70.6	21.4	1.89	V
S2.4	Spray #2	Octocrylene	82	3.07		33	Male	Black or African American	Not Hispanic or Latino	181.5	70.6	21.4	1.89	V
S2.4	Spray #2	Octocrylene	84	3.03		33	Male	Black or African American	Not Hispanic or Latino	181.5	70.6	21.4	1.89	V
S2.4	Spray #2	Octocrylene	86	3.55		33	Male	Black or African American	Not Hispanic or Latino	181.5	70.6	21.4	1.89	V
S2.4	Spray #2	Octocrylene	95	2.23		33	Male	Black or African American	Not Hispanic or Latino	181.5	70.6	21.4	1.89	V
S2.4	Spray #2	Octocrylene	120	1.26		33	Male	Black or African American	Not Hispanic or Latino	181.5	70.6	21.4	1.89	V
S2.4	Spray #2	Octocrylene	144	0.76		33	Male	Black or African American	Not Hispanic or Latino	181.5	70.6	21.4	1.89	V
S2.4	Spray #2	Oxybenzone	0	0	< 0.4	33	Male	Black or African American	Not Hispanic or Latino	181.5	70.6	21.4	1.89	V
S2.4	Spray #2	Oxybenzone	0.5	2.49		33	Male	Black or African American	Not Hispanic or Latino	181.5	70.6	21.4	1.89	V
S2.4	Spray #2	Oxybenzone	1	7.16		33	Male	Black or African American	Not Hispanic or Latino	181.5	70.6	21.4	1.89	V
S2.4	Spray #2	Oxybenzone	1.5	20.13		33	Male	Black or African American	Not Hispanic or Latino	181.5	70.6	21.4	1.89	V
S2.4	Spray #2	Oxybenzone	2	26.72		33	Male	Black or African American	Not Hispanic or Latino	181.5	70.6	21.4	1.89	V
S2.4	Spray #2	Oxybenzone	4	60.8		33	Male	Black or African American	Not Hispanic or Latino	181.5	70.6	21.4	1.89	V
S2.4	Spray #2	Oxybenzone	6	56.31		33	Male	Black or African American	Not Hispanic or Latino	181.5	70.6	21.4	1.89	V
S2.4	Spray #2	Oxybenzone	8	146.8		33	Male	Black or African American	Not Hispanic or Latino	181.5	70.6	21.4	1.89	V
S2.4	Spray #2	Oxybenzone	9	76.32		33	Male	Black or African American	Not Hispanic or Latino	181.5	70.6	21.4	1.89	V
S2.4	Spray #2	Oxybenzone	10	84.27		33	Male	Black or African American	Not Hispanic or Latino	181.5	70.6	21.4	1.89	V
S2.4	Spray #2	Oxybenzone	12	102.86		33	Male	Black or African American	Not Hispanic or Latino	181.5	70.6	21.4	1.89	V
S2.4	Spray #2	Oxybenzone	14	66.65		33	Male	Black or African American	Not Hispanic or Latino	181.5	70.6	21.4	1.89	V
S2.4	Spray #2	Oxybenzone	23	56.48		33	Male	Black or African American	Not Hispanic or Latino	181.5	70.6	21.4	1.89	V
S2.4	Spray #2	Oxybenzone	28	75.37		33	Male	Black or African American	Not Hispanic or Latino	181.5	70.6	21.4	1.89	V
S2.4	Spray #2	Oxybenzone	33	192.6		33	Male	Black or African American	Not Hispanic or Latino	181.5	70.6	21.4	1.89	V
S2.4	Spray #2	Oxybenzone	47	74.93		33	Male	Black or African American	Not Hispanic or Latino	181.5	70.6	21.4	1.89	V
S2.4	Spray #2	Oxybenzone	52	125.99		33	Male	Black or African American	Not Hispanic or Latino	181.5	70.6	21.4	1.89	V
S2.4	Spray #2	Oxybenzone	57	206.28		33	Male	Black or African American	Not Hispanic or Latino	181.5	70.6	21.4	1.89	V
S2.4	Spray #2	Oxybenzone	71	78.61		33	Male	Black or African American	Not Hispanic or Latino	181.5	70.6	21.4	1.89	V
S2.4	Spray #2	Oxybenzone	73	94.18		33	Male	Black or African American	Not Hispanic or Latino	181.5	70.6	21.4	1.89	V
S2.4	Spray #2	Oxybenzone	74	100.25		33	Male	Black or African American	Not Hispanic or Latino	181.5	70.6	21.4	1.89	V
S2.4	Spray #2	Oxybenzone	76	105.68		33	Male	Black or African American	Not Hispanic or Latino	181.5	70.6	21.4	1.89	V
S2.4	Spray #2	Oxybenzone	78	121.54		33	Male	Black or African American	Not Hispanic or Latino	181.5	70.6	21.4	1.89	V
S2.4	Spray #2	Oxybenzone	81	137.7		33	Male	Black or African American	Not Hispanic or Latino	181.5	70.6	21.4	1.89	V
S2.4	Spray #2	Oxybenzone	82	137.43		33	Male	Black or African American	Not Hispanic or Latino	181.5	70.6	21.4	1.89	V
S2.4	Spray #2	Oxybenzone	84	138.06		33	Male	Black or African American	Not Hispanic or Latino	181.5	70.6	21.4	1.89	V
S2.4	Spray #2	Oxybenzone	86	117.6		33	Male	Black or African American	Not Hispanic or Latino	181.5	70.6	21.4	1.89	V
S2.4	Spray #2	Oxybenzone	95	84.03		33	Male	Black or African American	Not Hispanic or Latino	181.5	70.6	21.4	1.89	V
S2.4	Spray #2	Oxybenzone	120	36.79		33	Male	Black or African American	Not Hispanic or Latino	181.5	70.6	21.4	1.89	V
S2.4	Spray #2	Oxybenzone	144	20.05		33	Male	Black or African American	Not Hispanic or Latino	181.5	70.6	21.4	1.89	V
S2.5	Spray #2	Avobenzone	0	0	< 0.2	26	Male	Black or African American	Not Hispanic or Latino	169.5	83.2	29	1.98	VI
S2.5	Spray #2	Avobenzone	0.5	0	< 0.2	26	Male	Black or African American	Not Hispanic or Latino	169.5	83.2	29	1.98	VI
S2.5	Spray #2	Avobenzone	1	0	< 0.2	26	Male	Black or African American	Not Hispanic or Latino	169.5	83.2	29	1.98	VI
S2.5	Spray #2	Avobenzone	1.5	0	< 0.2	26	Male	Black or African American	Not Hispanic or Latino	169.5	83.2	29	1.98	VI
S2.5	Spray #2	Avobenzone	2	0	< 0.2	26	Male	Black or African American	Not Hispanic or Latino	169.5	83.2	29	1.98	VI
S2.5	Spray #2	Avobenzone	4	0.55		26	Male	Black or African American	Not Hispanic or Latino	169.5	83.2	29	1.98	VI
S2.5	Spray #2	Avobenzone	6	1.44		26	Male	Black or African American	Not Hispanic or Latino	169.5	83.2	29	1.98	VI
S2.5	Spray #2	Avobenzone	8	0.78		26	Male	Black or African American	Not Hispanic or Latino	169.5	83.2	29	1.98	VI
S2.5	Spray #2	Avobenzone	9	0.56		26	Male	Black or African American	Not Hispanic or Latino	169.5	83.2	29	1.98	VI
S2.5	Spray #2	Avobenzone	10	0.6		26	Male	Black or African American	Not Hispanic or Latino	169.5	83.2	29	1.98	VI
S2.5	Spray #2	Avobenzone	12	1.37		26	Male	Black or African American	Not Hispanic or Latino	169.5	83.2	29	1.98	VI
S2.5	Spray #2	Avobenzone	14	1.54		26	Male	Black or African American	Not Hispanic or Latino	169.5	83.2	29	1.98	VI
S2.5	Spray #2	Avobenzone	23	0.46		26	Male	Black or African American	Not Hispanic or Latino	169.5	83.2	29	1.98	VI
S2.5	Spray #2	Avobenzone	28	1.4		26	Male	Black or African American	Not Hispanic or Latino	169.5	83.2	29	1.98	VI
S2.5	Spray #2	Avobenzone	33	1.78		26	Male	Black or African American	Not Hispanic or Latino	169.5	83.2	29	1.98	VI
S2.5	Spray #2	Avobenzone	47	0.97		26	Male	Black or African American	Not Hispanic or Latino	169.5	83.2	29	1.98	VI
S2.5	Spray #2	Avobenzone	52	2.38		26	Male	Black or African American	Not Hispanic or Latino	169.5	83.2	29	1.98	VI
S2.5	Spray #2	Avobenzone	57	1.75		26	Male	Black or African American	Not Hispanic or Latino	169.5	83.2	29	1.98	VI
S2.5	Spray #2	Avobenzone	71	1.48		26	Male	Black or African American	Not Hispanic or Latino	169.5	83.2	29	1.98	VI
S2.5	Spray #2	Avobenzone	73	1.19		26	Male	Black or African American	Not Hispanic or Latino	169.5	83.2	29	1.98	VI
S2.5	Spray #2	Avobenzone	74	2.6		26	Male	Black or African American	Not Hispanic or Latino	169.5	83.2	29	1.98	VI
S2.5	Spray #2	Avobenzone	76	1.27		26	Male	Black or African American	Not Hispanic or Latino	169.5	83.2	29	1.98	VI
S2.5	Spray #2	Avobenzone	78	4.01		26	Male	Black or African American	Not Hispanic or Latino	169.5	83.2	29	1.98	VI
S2.5	Spray #2	Avobenzone	81	2.9		26	Male	Black or African American	Not Hispanic or Latino	169.5	83.2	29	1.98	VI
S2.5	Spray #2	Avobenzone	82	1.7		26	Male	Black or African American	Not Hispanic or Latino	169.5	83.2	29	1.98	VI
S2.5	Spray #2	Avobenzone	84	1.18		26	Male	Black or African American	Not Hispanic or Latino	169.5	83.2	29	1.98	VI
S2.5	Spray #2	Avobenzone	86	2.7		26	Male	Black or African American	Not Hispanic or Latino	169.5	83.2	29	1.98	VI
S2.5	Spray #2	Avobenzone	95	1.68		26	Male	Black or African American	Not Hispanic or Latino	169.5	83.2	29	1.98	VI
S2.5	Spray #2	Avobenzone	120	0.99		26	Male	Black or African American	Not Hispanic or Latino	169.5	83.2	29	1.98	VI
S2.5	Spray #2	Avobenzone	144	0.49		26	Male	Black or African American	Not Hispanic or Latino	169.5	83.2	29	1.98	VI
S2.5	Spray #2	Octocrylene	0	0	< 0.4	26	Male	Black or African American	Not Hispanic or Latino	169.5	83.2	29	1.98	VI
S2.5	Spray #2	Octocrylene	0.5	0	< 0.4	26	Male	Black or African American	Not Hispanic or Latino	169.5	83.2	29	1.98	VI
S2.5	Spray #2	Octocrylene	1	0	< 0.4	26	Male	Black or African American	Not Hispanic or Latino	169.5	83.2	29	1.98	VI
S2.5	Spray #2	Octocrylene	1.5	0	< 0.4	26	Male	Black or African American	Not Hispanic or Latino	169.5	83.2	29	1.98	VI
S2.5	Spray #2	Octocrylene	2	0	< 0.4	26	Male	Black or African American	Not Hispanic or Latino	169.5	83.2	29	1.98	VI
S2.5	Spray #2	Octocrylene	4	0.88		26	Male	Black or African American	Not Hispanic or Latino	169.5	83.2	29	1.98	VI
S2.5	Spray #2	Octocrylene	6	2.34		26	Male	Black or African American	Not Hispanic or Latino	169.5	83.2	29	1.98	VI
S2.5	Spray #2	Octocrylene	8	1.35		26	Male	Black or African American	Not Hispanic or Latino	169.5	83.2	29	1.98	VI
S2.5	Spray #2	Octocrylene	9	1.1		26	Male	Black or African American	Not Hispanic or Latino	169.5	83.2	29	1.98	VI
S2.5	Spray #2	Octocrylene	10	0.91		26	Male	Black or African American	Not Hispanic or Latino	169.5	83.2	29	1.98	VI
S2.5	Spray #2	Octocrylene	12	2.87		26	Male	Black or African American	Not Hispanic or Latino	169.5	83.2	29	1.98	VI
S2.5	Spray #2	Octocrylene	14	3.53		26	Male	Black or African American	Not Hispanic or Latino	169.5	83.2	29	1.98	VI
S2.5	Spray #2	Octocrylene	23	0.94		26	Male	Black or African American	Not Hispanic or Latino	169.5	83.2	29	1.98	VI
S2.5	Spray #2	Octocrylene	28	3.19		26	Male	Black or African American	Not Hispanic or Latino	169.5	83.2	29	1.98	VI
S2.5	Spray #2	Octocrylene	33	2.73		26	Male	Black or African American	Not Hispanic or Latino	169.5	83.2	29	1.98	VI
S2.5	Spray #2	Octocrylene	47	2.67		26	Male	Black or African American	Not Hispanic or Latino	169.5	83.2	29	1.98	VI
S2.5	Spray #2	Octocrylene	52	4.82		26	Male	Black or African American	Not Hispanic or Latino	169.5	83.2	29	1.98	VI
S2.5	Spray #2	Octocrylene	57	3.61		26	Male	Black or African American	Not Hispanic or Latino	169.5	83.2	29	1.98	VI
S2.5	Spray #2	Octocrylene	71	3.11		26	Male	Black or African American	Not Hispanic or Latino	169.5	83.2	29	1.98	VI
S2.5	Spray #2	Octocrylene	73	2		26	Male	Black or African American	Not Hispanic or Latino	169.5	83.2	29	1.98	VI
S2.5	Spray #2	Octocrylene	74	6.66		26	Male	Black or African American	Not Hispanic or Latino	169.5	83.2	29	1.98	VI
S2.5	Spray #2	Octocrylene	76	2.05		26	Male	Black or African American	Not Hispanic or Latino	169.5	83.2	29	1.98	VI
S2.5	Spray #2	Octocrylene	78	6.96		26	Male	Black or African American	Not Hispanic or Latino	169.5	83.2	29	1.98	VI
S2.5	Spray #2	Octocrylene	81	4.12		26	Male	Black or African American	Not Hispanic or Latino	169.5	83.2	29	1.98	VI
S2.5	Spray #2	Octocrylene	82	2.94		26	Male	Black or African American	Not Hispanic or Latino	169.5	83.2	29	1.98	VI
S2.5	Spray #2	Octocrylene	84	3.38		26	Male	Black or African American	Not Hispanic or Latino	169.5	83.2	29	1.98	VI
S2.5	Spray #2	Octocrylene	86	4.19		26	Male	Black or African American	Not Hispanic or Latino	169.5	83.2	29	1.98	VI
S2.5	Spray #2	Octocrylene	95	3.59		26	Male	Black or African American	Not Hispanic or Latino	169.5	83.2	29	1.98	VI
[truncated: 122 more rows]
